# Supplementary material for: Psychometric Characteristics of the Patient-Reported Outcome Measures Applied in the CENTER-TBI Study
Source: J Clin Med. 2021 May 28;10(11):2396. doi: 10.3390/jcm10112396 (PMC8199160; doi:10.3390/jcm10112396)
Supplement: Supplementary file 1 [file jcm-10-02396-s001.zip]

Archive with 4 entries (4 files):
- OS_1_Sociodemographics.xlsx
- OS_2_Reliability.xlsx
- OS_3_Factorial_validity.xlsx
- OS_4_Participants_and_Investigators.pdf
