# Supplementary material for: Psychometric Characteristics of the Patient-Reported Outcome Measures Applied in the CENTER-TBI Study
Source: J Clin Med. 2021 May 28;10(11):2396. doi: 10.3390/jcm10112396 (PMC8199160; doi:10.3390/jcm10112396)
Supplement: Supplementary file 1 [file jcm-10-02396-s001.zip › OS_1_Sociodemographics.xlsx]

## Sheet: Table 1. GAD-7
		Dutch	English	Finnish	French	German	Italian	Norwegian	Spanish	Swedish
Variable	Group/statistics	(N=584)	(N=214)	(N=207)	(N=109)	(N=78)	(N=266)	(N=253)	(N=253)	(N=60)
Sex	female	222 (38.0%)	70 (32.7%)	83 (40.1%)	27 (24.8%)	23 (29.5%)	84 (31.6%)	80 (31.6%)	75 (29.6%)	28 (46.7%)
	male	362 (62.0%)	144 (67.3%)	124 (59.9%)	82 (75.2%)	55 (70.5%)	182 (68.4%)	173 (68.4%)	178 (70.4%)	32 (53.3%)
Age	M (SD)	53.0 (18.8)	47.8 (16.9)	47.6 (19.7)	43.0 (17.9)	57.3 (18.0)	50.1 (20.7)	45.9 (19.7)	47.0 (19.4)	49.6 (18.6)
	Mdn [Min, Max]	57.0 [16.0, 95.0]	49.0 [16.0, 85.0]	49.0 [16.0, 89.0]	43.0 [16.0, 87.0]	59.0 [18.0, 86.0]	53.0 [16.0, 93.0]	48.0 [16.0, 89.0]	44.0 [16.0, 93.0]	50.0 [18.0, 81.0]
Education	post-high school	356 (61.0%)	136 (63.6%)	71 (34.3%)	48 (44.0%)	34 (43.6%)	63 (23.7%)	154 (60.9%)	64 (25.3%)	27 (45.0%)
	secondary school/high school	124 (21.2%)	56 (26.2%)	65 (31.4%)	44 (40.4%)	26 (33.3%)	101 (38.0%)	62 (24.5%)	105 (41.5%)	16 (26.7%)
	primary school/none/unknown	36 (6.2%)	2 (0.9%)	23 (11.1%)	7 (6.4%)	7 (9.0%)	64 (24.1%)	26 (10.3%)	81 (32.0%)	6 (10.0%)
	missing	68 (11.6%)	20 (9.3%)	48 (23.2%)	10 (9.2%)	11 (14.1%)	38 (14.3%)	11 (4.3%)	3 (1.2%)	11 (18.3%)
Employment	full-time employed	193 (33.0%)	113 (52.8%)	87 (42.0%)	53 (48.6%)	27 (34.6%)	102 (38.3%)	125 (49.4%)	130 (51.4%)	36 (60.0%)
	part-time employed	86 (14.7%)	22 (10.3%)	6 (2.9%)	7 (6.4%)	6 (7.7%)	39 (14.7%)	32 (12.6%)	26 (10.3%)	2 (3.3%)
	in training	46 (7.9%)	11 (5.1%)	29 (14.0%)	15 (13.8%)	6 (7.7%)	27 (10.2%)	33 (13.0%)	16 (6.3%)	3 (5.0%)
	unemployed	40 (6.8%)	18 (8.4%)	14 (6.8%)	11 (10.1%)	4 (5.1%)	16 (6.0%)	18 (7.1%)	23 (9.1%)	0 (0%)
	retired	173 (29.6%)	36 (16.8%)	50 (24.2%)	19 (17.4%)	33 (42.3%)	58 (21.8%)	40 (15.8%)	53 (20.9%)	13 (21.7%)
	missing	46 (7.9%)	14 (6.5%)	21 (10.1%)	4 (3.7%)	2 (2.6%)	24 (9.0%)	5 (2.0%)	5 (2.0%)	6 (10.0%)
Marital status	partnered	325 (55.7%)	110 (51.4%)	101 (48.8%)	53 (48.6%)	47 (60.3%)	132 (49.6%)	127 (50.2%)	119 (47.0%)	30 (50.0%)
	single	257 (44.0%)	104 (48.6%)	106 (51.2%)	54 (49.5%)	31 (39.7%)	134 (50.4%)	126 (49.8%)	134 (53.0%)	30 (50.0%)
	missing	2 (0.3%)	0 (0%)	0 (0%)	2 (1.8%)	0 (0%)	0 (0%)	0 (0%)	0 (0%)	0 (0%)
Living situation	not alone	447 (76.5%)	169 (79.0%)	147 (71.0%)	90 (82.6%)	62 (79.5%)	225 (84.6%)	201 (79.4%)	216 (85.4%)	43 (71.7%)
	alone	137 (23.5%)	45 (21.0%)	60 (29.0%)	17 (15.6%)	16 (20.5%)	41 (15.4%)	52 (20.6%)	37 (14.6%)	17 (28.3%)
	missing	0 (0%)	0 (0%)	0 (0%)	2 (1.8%)	0 (0%)	0 (0%)	0 (0%)	0 (0%)	0 (0%)
Premorbid psychological problems	no	523 (89.6%)	161 (75.2%)	180 (87.0%)	88 (80.7%)	69 (88.5%)	241 (90.6%)	215 (85.0%)	222 (87.7%)	49 (81.7%)
	yes	58 (9.9%)	48 (22.4%)	27 (13.0%)	16 (14.7%)	8 (10.3%)	25 (9.4%)	33 (13.0%)	30 (11.9%)	9 (15.0%)
	missing	3 (0.5%)	5 (2.3%)	0 (0%)	5 (4.6%)	1 (1.3%)	0 (0%)	5 (2.0%)	1 (0.4%)	2 (3.3%)
Admission type	ER	97 (16.6%)	57 (26.6%)	47 (22.7%)	11 (10.1%)	10 (12.8%)	67 (25.2%)	62 (24.5%)	71 (28.1%)	14 (23.3%)
	ADM	303 (51.9%)	69 (32.2%)	98 (47.3%)	6 (5.5%)	17 (21.8%)	57 (21.4%)	111 (43.9%)	54 (21.3%)	13 (21.7%)
	ICU	184 (31.5%)	88 (41.1%)	62 (30.0%)	92 (84.4%)	51 (65.4%)	142 (53.4%)	80 (31.6%)	128 (50.6%)	33 (55.0%)
Injury cause	road traffic accident	235 (40.2%)	103 (48.1%)	66 (31.9%)	44 (40.4%)	24 (30.8%)	134 (50.4%)	101 (39.9%)	107 (42.3%)	23 (38.3%)
	incidental fall	279 (47.8%)	81 (37.9%)	97 (46.9%)	51 (46.8%)	44 (56.4%)	94 (35.3%)	105 (41.5%)	116 (45.8%)	27 (45.0%)
	other non-intentional injury	22 (3.8%)	12 (5.6%)	16 (7.7%)	4 (3.7%)	6 (7.7%)	11 (4.1%)	18 (7.1%)	6 (2.4%)	3 (5.0%)
	violence/assault	14 (2.4%)	10 (4.7%)	12 (5.8%)	3 (2.8%)	2 (2.6%)	3 (1.1%)	13 (5.1%)	9 (3.6%)	2 (3.3%)
	act of mass violence	0 (0%)	0 (0%)	1 (0.5%)	0 (0%)	0 (0%)	0 (0%)	0 (0%)	0 (0%)	0 (0%)
	suicide attempt	4 (0.7%)	0 (0%)	1 (0.5%)	0 (0%)	0 (0%)	7 (2.6%)	0 (0%)	7 (2.8%)	0 (0%)
	other	25 (4.3%)	5 (2.3%)	7 (3.4%)	3 (2.8%)	2 (2.6%)	10 (3.8%)	12 (4.7%)	3 (1.2%)	2 (3.3%)
	missing	5 (0.9%)	3 (1.4%)	7 (3.4%)	4 (3.7%)	0 (0%)	7 (2.6%)	4 (1.6%)	5 (2.0%)	3 (5.0%)
LOC	no	196 (33.6%)	43 (20.1%)	63 (30.4%)	20 (18.3%)	30 (38.5%)	127 (47.7%)	39 (15.4%)	97 (38.3%)	20 (33.3%)
	yes	347 (59.4%)	144 (67.3%)	137 (66.2%)	72 (66.1%)	42 (53.8%)	111 (41.7%)	172 (68.0%)	139 (54.9%)	37 (61.7%)
	missing	41 (7.0%)	27 (12.6%)	7 (3.4%)	17 (15.6%)	6 (7.7%)	28 (10.5%)	42 (16.6%)	17 (6.7%)	3 (5.0%)
PTA	no	253 (43.3%)	59 (27.6%)	76 (36.7%)	31 (28.4%)	31 (39.7%)	95 (35.7%)	50 (19.8%)	114 (45.1%)	13 (21.7%)
	yes	242 (41.4%)	75 (35.0%)	99 (47.8%)	27 (24.8%)	31 (39.7%)	80 (30.1%)	162 (64.0%)	113 (44.7%)	20 (33.3%)
	missing	89 (15.2%)	80 (37.4%)	32 (15.5%)	51 (46.8%)	16 (20.5%)	91 (34.2%)	41 (16.2%)	26 (10.3%)	27 (45.0%)
GCS score at baseline	M (SD)	13.4 (3.11)	12.0 (4.48)	13.7 (2.66)	10.3 (4.82)	13.0 (3.61)	11.9 (4.14)	13.4 (3.11)	12.4 (4.52)	11.5 (4.02)
	Mdn [Min, Max]	15.0 [3.00, 15.0]	15.0 [3.00, 15.0]	15.0 [3.00, 15.0]	13.0 [3.00, 15.0]	15.0 [3.00, 15.0]	14.0 [3.00, 15.0]	15.0 [3.00, 15.0]	15.0 [3.00, 15.0]	13.0 [3.00, 15.0]
	missing	15 (2.6%)	1 (0.5%)	8 (3.9%)	9 (8.3%)	1 (1.3%)	0 (0%)	2 (0.8%)	2 (0.8%)	3 (5.0%)
GOSE at six months	M (SD)	6.75 (1.33)	6.44 (1.58)	7.00 (1.37)	6.25 (1.47)	6.71 (1.72)	6.50 (1.66)	6.79 (1.28)	6.71 (1.45)	6.28 (1.67)
	Mdn [Min, Max]	7.00 [3.00, 8.00]	7.00 [3.00, 8.00]	8.00 [3.00, 8.00]	6.00 [3.00, 8.00]	8.00 [3.00, 8.00]	7.00 [3.00, 8.00]	7.00 [3.00, 8.00]	7.00 [3.00, 8.00]	7.00 [3.00, 8.00]
	missing	0 (0%)	1 (0.5%)	0 (0%)	0 (0%)	0 (0%)	0 (0%)	0 (0%)	0 (0%)	0 (0%)
Injury Severity Score	M (SD)	17.1 (12.1)	21.0 (17.7)	13.4 (10.1)	28.9 (17.9)	20.7 (14.2)	22.7 (18.0)	17.7 (14.7)	19.5 (16.4)	24.5 (17.9)
	Mdn [Min, Max]	13.0 [1.00, 75.0]	17.0 [1.00, 75.0]	9.00 [1.00, 50.0]	27.0 [1.00, 75.0]	16.0 [1.00, 66.0]	18.0 [1.00, 75.0]	13.0 [1.00, 75.0]	16.0 [1.00, 75.0]	19.5 [1.00, 66.0]
	missing	0 (0%)	0 (0%)	0 (0%)	20 (18.3%)	0 (0%)	0 (0%)	0 (0%)	0 (0%)	2 (3.3%)
Brain Injury AIS	M (SD)	2.83 (1.23)	2.98 (1.65)	2.84 (1.14)	3.96 (1.38)	3.46 (1.22)	3.10 (1.56)	2.98 (1.10)	2.87 (1.29)	3.72 (1.29)
	Mdn [Min, Max]	3.00 [1.00, 5.00]	3.00 [1.00, 5.00]	3.00 [1.00, 5.00]	4.00 [0, 6.00]	4.00 [1.00, 5.00]	3.00 [1.00, 5.00]	3.00 [1.00, 5.00]	3.00 [1.00, 6.00]	4.00 [1.00, 5.00]
	missing	0 (0%)	0 (0%)	0 (0%)	19 (17.4%)	0 (0%)	0 (0%)	0 (0%)	0 (0%)	2 (3.3%)
Abnormalities on the first CT scan	absent	279 (47.8%)	67 (31.3%)	64 (30.9%)	20 (18.3%)	6 (7.7%)	56 (21.1%)	110 (43.5%)	78 (30.8%)	15 (25.0%)
	present	286 (49.0%)	96 (44.9%)	84 (40.6%)	78 (71.6%)	36 (46.2%)	114 (42.9%)	112 (44.3%)	150 (59.3%)	42 (70.0%)
	missing	19 (3.3%)	51 (23.8%)	59 (28.5%)	11 (10.1%)	36 (46.2%)	96 (36.1%)	31 (12.3%)	25 (9.9%)	3 (5.0%)
Note. ER = emergency room, ADM = admission to a ward, ICU = intensive care unit, LOC = lost of conciousness, PTA = post-traumatic amnesia, GCS = Glasgow Coma Scale, GOSE = Glasgow Outcome Scale - Extended, Brain Injury AIS = Brain Injury Abbreviated Injury Scale, CT = computed tomography, M = mean, SD = standard deviation, Mdn = median, Min = minimum, Max = maximum.

## Sheet: Table 2. PHQ-9
		Dutch	English	Finnish	French	German	Italian	Norwegian	Spanish	Swedish
Variable	Group/statistics	(N=587)	(N=214)	(N=206)	(N=107)	(N=81)	(N=265)	(N=254)	(N=253)	(N=60)
Sex	female	223 (38.0%)	70 (32.7%)	83 (40.3%)	27 (25.2%)	26 (32.1%)	84 (31.7%)	81 (31.9%)	75 (29.6%)	28 (46.7%)
	male	364 (62.0%)	144 (67.3%)	123 (59.7%)	80 (74.8%)	55 (67.9%)	181 (68.3%)	173 (68.1%)	178 (70.4%)	32 (53.3%)
Age	M (SD)	52.9 (18.9)	47.8 (16.9)	47.6 (19.7)	42.9 (18.2)	57.7 (18.5)	50.1 (20.7)	45.8 (19.8)	47.0 (19.4)	49.6 (18.6)
	Mdn [Min, Max]	57.0 [16.0, 95.0]	49.0 [16.0, 85.0]	49.0 [16.0, 89.0]	43.0 [16.0, 87.0]	59.0 [18.0, 87.0]	53.0 [16.0, 93.0]	48.0 [16.0, 89.0]	44.0 [16.0, 93.0]	50.0 [18.0, 81.0]
Education	post-high school	356 (60.6%)	136 (63.6%)	71 (34.5%)	48 (44.9%)	34 (42.0%)	63 (23.8%)	154 (60.6%)	64 (25.3%)	27 (45.0%)
	secondary school/high school	126 (21.5%)	56 (26.2%)	65 (31.6%)	41 (38.3%)	27 (33.3%)	101 (38.1%)	63 (24.8%)	105 (41.5%)	16 (26.7%)
	primary school/none/unknown	37 (6.3%)	2 (0.9%)	23 (11.2%)	7 (6.5%)	8 (9.9%)	64 (24.2%)	26 (10.2%)	81 (32.0%)	6 (10.0%)
	missing	68 (11.6%)	20 (9.3%)	47 (22.8%)	11 (10.3%)	12 (14.8%)	37 (14.0%)	11 (4.3%)	3 (1.2%)	11 (18.3%)
Employment	full-time employed	194 (33.0%)	113 (52.8%)	86 (41.7%)	52 (48.6%)	26 (32.1%)	102 (38.5%)	125 (49.2%)	130 (51.4%)	36 (60.0%)
	part-time employed	86 (14.7%)	22 (10.3%)	6 (2.9%)	7 (6.5%)	7 (8.6%)	39 (14.7%)	32 (12.6%)	26 (10.3%)	2 (3.3%)
	in training	48 (8.2%)	11 (5.1%)	29 (14.1%)	15 (14.0%)	7 (8.6%)	27 (10.2%)	34 (13.4%)	16 (6.3%)	3 (5.0%)
	unemployed	41 (7.0%)	18 (8.4%)	14 (6.8%)	12 (11.2%)	4 (4.9%)	16 (6.0%)	18 (7.1%)	23 (9.1%)	0 (0%)
	retired	172 (29.3%)	36 (16.8%)	50 (24.3%)	17 (15.9%)	34 (42.0%)	57 (21.5%)	40 (15.7%)	53 (20.9%)	13 (21.7%)
	missing	46 (7.8%)	14 (6.5%)	21 (10.2%)	4 (3.7%)	3 (3.7%)	24 (9.1%)	5 (2.0%)	5 (2.0%)	6 (10.0%)
Marital status	partnered	324 (55.2%)	110 (51.4%)	101 (49.0%)	50 (46.7%)	47 (58.0%)	132 (49.8%)	127 (50.0%)	119 (47.0%)	30 (50.0%)
	single	261 (44.5%)	104 (48.6%)	105 (51.0%)	55 (51.4%)	34 (42.0%)	133 (50.2%)	127 (50.0%)	134 (53.0%)	30 (50.0%)
	missing	2 (0.3%)	0 (0%)	0 (0%)	2 (1.9%)	0 (0%)	0 (0%)	0 (0%)	0 (0%)	0 (0%)
Living situation	not alone	449 (76.5%)	169 (79.0%)	147 (71.4%)	87 (81.3%)	63 (77.8%)	225 (84.9%)	201 (79.1%)	216 (85.4%)	43 (71.7%)
	alone	138 (23.5%)	45 (21.0%)	59 (28.6%)	18 (16.8%)	18 (22.2%)	40 (15.1%)	53 (20.9%)	37 (14.6%)	17 (28.3%)
	missing	0 (0%)	0 (0%)	0 (0%)	2 (1.9%)	0 (0%)	0 (0%)	0 (0%)	0 (0%)	0 (0%)
Premorbid psychological problems	no	525 (89.4%)	161 (75.2%)	179 (86.9%)	85 (79.4%)	73 (90.1%)	240 (90.6%)	216 (85.0%)	222 (87.7%)	49 (81.7%)
	yes	59 (10.1%)	48 (22.4%)	27 (13.1%)	17 (15.9%)	7 (8.6%)	25 (9.4%)	33 (13.0%)	30 (11.9%)	9 (15.0%)
	missing	3 (0.5%)	5 (2.3%)	0 (0%)	5 (4.7%)	1 (1.2%)	0 (0%)	5 (2.0%)	1 (0.4%)	2 (3.3%)
Admission type	ER	97 (16.5%)	57 (26.6%)	47 (22.8%)	11 (10.3%)	12 (14.8%)	67 (25.3%)	62 (24.4%)	71 (28.1%)	14 (23.3%)
	ADM	304 (51.8%)	69 (32.2%)	98 (47.6%)	6 (5.6%)	18 (22.2%)	57 (21.5%)	111 (43.7%)	54 (21.3%)	13 (21.7%)
	ICU	186 (31.7%)	88 (41.1%)	61 (29.6%)	90 (84.1%)	51 (63.0%)	141 (53.2%)	81 (31.9%)	128 (50.6%)	33 (55.0%)
Injury cause	road traffic accident	236 (40.2%)	103 (48.1%)	66 (32.0%)	44 (41.1%)	25 (30.9%)	133 (50.2%)	102 (40.2%)	107 (42.3%)	23 (38.3%)
	incidental fall	280 (47.7%)	81 (37.9%)	97 (47.1%)	49 (45.8%)	46 (56.8%)	94 (35.5%)	105 (41.3%)	116 (45.8%)	27 (45.0%)
	other non-intentional injury	22 (3.7%)	12 (5.6%)	16 (7.8%)	4 (3.7%)	6 (7.4%)	11 (4.2%)	18 (7.1%)	6 (2.4%)	3 (5.0%)
	violence/assault	14 (2.4%)	10 (4.7%)	12 (5.8%)	3 (2.8%)	2 (2.5%)	3 (1.1%)	13 (5.1%)	9 (3.6%)	2 (3.3%)
	act of mass violence	0 (0%)	0 (0%)	1 (0.5%)	0 (0%)	0 (0%)	0 (0%)	0 (0%)	0 (0%)	0 (0%)
	suicide attempt	4 (0.7%)	0 (0%)	1 (0.5%)	0 (0%)	0 (0%)	7 (2.6%)	0 (0%)	7 (2.8%)	0 (0%)
	other	26 (4.4%)	5 (2.3%)	6 (2.9%)	3 (2.8%)	2 (2.5%)	10 (3.8%)	12 (4.7%)	3 (1.2%)	2 (3.3%)
	missing	5 (0.9%)	3 (1.4%)	7 (3.4%)	4 (3.7%)	0 (0%)	7 (2.6%)	4 (1.6%)	5 (2.0%)	3 (5.0%)
LOC	no	196 (33.4%)	43 (20.1%)	63 (30.6%)	19 (17.8%)	32 (39.5%)	127 (47.9%)	39 (15.4%)	97 (38.3%)	20 (33.3%)
	yes	350 (59.6%)	144 (67.3%)	136 (66.0%)	70 (65.4%)	43 (53.1%)	111 (41.9%)	173 (68.1%)	139 (54.9%)	37 (61.7%)
	missing	41 (7.0%)	27 (12.6%)	7 (3.4%)	18 (16.8%)	6 (7.4%)	27 (10.2%)	42 (16.5%)	17 (6.7%)	3 (5.0%)
PTA	no	254 (43.3%)	59 (27.6%)	76 (36.9%)	30 (28.0%)	34 (42.0%)	96 (36.2%)	50 (19.7%)	114 (45.1%)	13 (21.7%)
	yes	244 (41.6%)	75 (35.0%)	99 (48.1%)	26 (24.3%)	30 (37.0%)	80 (30.2%)	163 (64.2%)	113 (44.7%)	20 (33.3%)
	missing	89 (15.2%)	80 (37.4%)	31 (15.0%)	51 (47.7%)	17 (21.0%)	89 (33.6%)	41 (16.1%)	26 (10.3%)	27 (45.0%)
GCS score at baseline	M (SD)	13.4 (3.10)	12.0 (4.48)	13.7 (2.66)	10.4 (4.79)	13.3 (3.37)	12.0 (4.14)	13.4 (3.13)	12.4 (4.52)	11.5 (4.02)
	Mdn [Min, Max]	15.0 [3.00, 15.0]	15.0 [3.00, 15.0]	15.0 [3.00, 15.0]	13.0 [3.00, 15.0]	15.0 [3.00, 15.0]	14.0 [3.00, 15.0]	15.0 [3.00, 15.0]	15.0 [3.00, 15.0]	13.0 [3.00, 15.0]
	missing	15 (2.6%)	1 (0.5%)	8 (3.9%)	8 (7.5%)	1 (1.2%)	0 (0%)	2 (0.8%)	2 (0.8%)	3 (5.0%)
GOSE at six months	M (SD)	6.75 (1.33)	6.44 (1.58)	7.01 (1.37)	6.21 (1.49)	6.68 (1.75)	6.49 (1.66)	6.78 (1.28)	6.71 (1.45)	6.28 (1.67)
	Mdn [Min, Max]	7.00 [3.00, 8.00]	7.00 [3.00, 8.00]	8.00 [3.00, 8.00]	6.00 [3.00, 8.00]	8.00 [3.00, 8.00]	7.00 [3.00, 8.00]	7.00 [3.00, 8.00]	7.00 [3.00, 8.00]	7.00 [3.00, 8.00]
	missing	0 (0%)	1 (0.5%)	0 (0%)	0 (0%)	0 (0%)	0 (0%)	0 (0%)	0 (0%)	0 (0%)
Injury Severity Score	M (SD)	17.1 (12.1)	21.0 (17.7)	13.4 (10.1)	27.8 (17.2)	20.4 (14.1)	22.5 (17.9)	17.7 (14.7)	19.5 (16.4)	24.5 (17.9)
	Mdn [Min, Max]	13.0 [1.00, 75.0]	17.0 [1.00, 75.0]	9.00 [1.00, 50.0]	25.5 [1.00, 75.0]	16.0 [1.00, 66.0]	18.0 [1.00, 75.0]	13.0 [1.00, 75.0]	16.0 [1.00, 75.0]	19.5 [1.00, 66.0]
	missing	0 (0%)	0 (0%)	0 (0%)	21 (19.6%)	0 (0%)	0 (0%)	0 (0%)	0 (0%)	2 (3.3%)
Brain Injury AIS	M (SD)	2.83 (1.23)	2.98 (1.65)	2.83 (1.14)	3.91 (1.38)	3.44 (1.22)	3.09 (1.56)	2.98 (1.11)	2.87 (1.29)	3.72 (1.29)
	Mdn [Min, Max]	3.00 [1.00, 5.00]	3.00 [1.00, 5.00]	3.00 [1.00, 5.00]	4.00 [0, 5.00]	4.00 [1.00, 5.00]	3.00 [1.00, 5.00]	3.00 [1.00, 5.00]	3.00 [1.00, 6.00]	4.00 [1.00, 5.00]
	missing	0 (0%)	0 (0%)	0 (0%)	20 (18.7%)	0 (0%)	0 (0%)	0 (0%)	0 (0%)	2 (3.3%)
Abnormalities on the first CT scan	absent	282 (48.0%)	67 (31.3%)	64 (31.1%)	21 (19.6%)	8 (9.9%)	56 (21.1%)	110 (43.3%)	78 (30.8%)	15 (25.0%)
	present	286 (48.7%)	96 (44.9%)	83 (40.3%)	75 (70.1%)	36 (44.4%)	113 (42.6%)	113 (44.5%)	150 (59.3%)	42 (70.0%)
	missing	19 (3.2%)	51 (23.8%)	59 (28.6%)	11 (10.3%)	37 (45.7%)	96 (36.2%)	31 (12.2%)	25 (9.9%)	3 (5.0%)
Note. ER = emergency room, ADM = admission to a ward, ICU = intensive care unit, LOC = lost of conciousness, PTA = post-traumatic amnesia, GCS = Glasgow Coma Scale, GOSE = Glasgow Outcome Scale - Extended, Brain Injury AIS = Brain Injury Abbreviated Injury Scale, CT = computed tomography, M = mean, SD = standard deviation, Mdn = median, Min = minimum, Max = maximum.

## Sheet: Table 3. PCL-5
		Dutch	English	Finnish	French	German	Italian	Norwegian	Spanish	Swedish
Variable	Group/statistics	(N=586)	(N=213)	(N=212)	(N=110)	(N=76)	(N=261)	(N=248)	(N=256)	(N=57)
Sex	female	226 (38.6%)	69 (32.4%)	86 (40.6%)	28 (25.5%)	24 (31.6%)	83 (31.8%)	80 (32.3%)	77 (30.1%)	27 (47.4%)
	male	360 (61.4%)	144 (67.6%)	126 (59.4%)	82 (74.5%)	52 (68.4%)	178 (68.2%)	168 (67.7%)	179 (69.9%)	30 (52.6%)
Age	M (SD)	53.0 (19.0)	47.9 (17.0)	47.8 (19.6)	42.6 (18.0)	57.1 (18.7)	49.7 (20.7)	46.0 (19.7)	47.1 (19.4)	48.6 (18.3)
	Mdn [Min, Max]	57.0 [16.0, 95.0]	51.0 [16.0, 85.0]	50.0 [16.0, 89.0]	42.0 [16.0, 87.0]	59.0 [18.0, 86.0]	53.0 [16.0, 93.0]	48.0 [16.0, 89.0]	44.0 [16.0, 93.0]	50.0 [18.0, 81.0]
Education	post-high school	357 (60.9%)	134 (62.9%)	73 (34.4%)	50 (45.5%)	32 (42.1%)	63 (24.1%)	152 (61.3%)	64 (25.0%)	25 (43.9%)
	secondary school/high school	123 (21.0%)	57 (26.8%)	70 (33.0%)	43 (39.1%)	25 (32.9%)	98 (37.5%)	61 (24.6%)	106 (41.4%)	15 (26.3%)
	primary school/none/unknown	40 (6.8%)	2 (0.9%)	23 (10.8%)	7 (6.4%)	7 (9.2%)	63 (24.1%)	25 (10.1%)	83 (32.4%)	6 (10.5%)
	missing	66 (11.3%)	20 (9.4%)	46 (21.7%)	10 (9.1%)	12 (15.8%)	37 (14.2%)	10 (4.0%)	3 (1.2%)	11 (19.3%)
Employment	full-time employed	187 (31.9%)	112 (52.6%)	89 (42.0%)	55 (50.0%)	25 (32.9%)	102 (39.1%)	122 (49.2%)	131 (51.2%)	35 (61.4%)
	part-time employed	88 (15.0%)	22 (10.3%)	6 (2.8%)	8 (7.3%)	5 (6.6%)	36 (13.8%)	32 (12.9%)	26 (10.2%)	2 (3.5%)
	in training	50 (8.5%)	11 (5.2%)	30 (14.2%)	15 (13.6%)	7 (9.2%)	27 (10.3%)	34 (13.7%)	16 (6.2%)	3 (5.3%)
	unemployed	42 (7.2%)	18 (8.5%)	14 (6.6%)	10 (9.1%)	4 (5.3%)	16 (6.1%)	16 (6.5%)	23 (9.0%)	0 (0%)
	retired	174 (29.7%)	36 (16.9%)	51 (24.1%)	19 (17.3%)	32 (42.1%)	56 (21.5%)	39 (15.7%)	55 (21.5%)	11 (19.3%)
	missing	45 (7.7%)	14 (6.6%)	22 (10.4%)	3 (2.7%)	3 (3.9%)	24 (9.2%)	5 (2.0%)	5 (2.0%)	6 (10.5%)
Marital status	partnered	323 (55.1%)	110 (51.6%)	105 (49.5%)	55 (50.0%)	44 (57.9%)	129 (49.4%)	126 (50.8%)	121 (47.3%)	28 (49.1%)
	single	261 (44.5%)	103 (48.4%)	107 (50.5%)	54 (49.1%)	32 (42.1%)	132 (50.6%)	122 (49.2%)	135 (52.7%)	29 (50.9%)
	missing	2 (0.3%)	0 (0%)	0 (0%)	1 (0.9%)	0 (0%)	0 (0%)	0 (0%)	0 (0%)	0 (0%)
Living situation	not alone	448 (76.5%)	168 (78.9%)	151 (71.2%)	93 (84.5%)	60 (78.9%)	223 (85.4%)	200 (80.6%)	219 (85.5%)	41 (71.9%)
	alone	138 (23.5%)	45 (21.1%)	61 (28.8%)	16 (14.5%)	16 (21.1%)	38 (14.6%)	48 (19.4%)	37 (14.5%)	16 (28.1%)
	missing	0 (0%)	0 (0%)	0 (0%)	1 (0.9%)	0 (0%)	0 (0%)	0 (0%)	0 (0%)	0 (0%)
Premorbid psychological problems	no	526 (89.8%)	161 (75.6%)	182 (85.8%)	90 (81.8%)	68 (89.5%)	238 (91.2%)	213 (85.9%)	225 (87.9%)	47 (82.5%)
	yes	57 (9.7%)	47 (22.1%)	30 (14.2%)	16 (14.5%)	7 (9.2%)	23 (8.8%)	31 (12.5%)	30 (11.7%)	8 (14.0%)
	missing	3 (0.5%)	5 (2.3%)	0 (0%)	4 (3.6%)	1 (1.3%)	0 (0%)	4 (1.6%)	1 (0.4%)	2 (3.5%)
Admission type	ER	102 (17.4%)	56 (26.3%)	51 (24.1%)	12 (10.9%)	11 (14.5%)	67 (25.7%)	61 (24.6%)	72 (28.1%)	14 (24.6%)
	ADM	305 (52.0%)	68 (31.9%)	99 (46.7%)	6 (5.5%)	15 (19.7%)	56 (21.5%)	110 (44.4%)	54 (21.1%)	12 (21.1%)
	ICU	179 (30.5%)	89 (41.8%)	62 (29.2%)	92 (83.6%)	50 (65.8%)	138 (52.9%)	77 (31.0%)	130 (50.8%)	31 (54.4%)
Injury cause	road traffic accident	232 (39.6%)	101 (47.4%)	68 (32.1%)	46 (41.8%)	23 (30.3%)	132 (50.6%)	103 (41.5%)	109 (42.6%)	21 (36.8%)
	incidental fall	283 (48.3%)	80 (37.6%)	99 (46.7%)	51 (46.4%)	43 (56.6%)	92 (35.2%)	102 (41.1%)	117 (45.7%)	26 (45.6%)
	other non-intentional injury	22 (3.8%)	12 (5.6%)	16 (7.5%)	4 (3.6%)	6 (7.9%)	11 (4.2%)	18 (7.3%)	6 (2.3%)	3 (5.3%)
	violence/assault	14 (2.4%)	11 (5.2%)	13 (6.1%)	3 (2.7%)	2 (2.6%)	3 (1.1%)	12 (4.8%)	9 (3.5%)	2 (3.5%)
	act of mass violence	0 (0%)	0 (0%)	1 (0.5%)	0 (0%)	0 (0%)	0 (0%)	0 (0%)	0 (0%)	0 (0%)
	suicide attempt	3 (0.5%)	1 (0.5%)	1 (0.5%)	0 (0%)	0 (0%)	6 (2.3%)	0 (0%)	7 (2.7%)	0 (0%)
	other	27 (4.6%)	5 (2.3%)	6 (2.8%)	3 (2.7%)	2 (2.6%)	10 (3.8%)	10 (4.0%)	3 (1.2%)	2 (3.5%)
	missing	5 (0.9%)	3 (1.4%)	8 (3.8%)	3 (2.7%)	0 (0%)	7 (2.7%)	3 (1.2%)	5 (2.0%)	3 (5.3%)
LOC	no	196 (33.4%)	43 (20.2%)	65 (30.7%)	19 (17.3%)	30 (39.5%)	127 (48.7%)	38 (15.3%)	98 (38.3%)	18 (31.6%)
	yes	348 (59.4%)	144 (67.6%)	138 (65.1%)	76 (69.1%)	40 (52.6%)	106 (40.6%)	169 (68.1%)	139 (54.3%)	37 (64.9%)
	missing	42 (7.2%)	26 (12.2%)	9 (4.2%)	15 (13.6%)	6 (7.9%)	28 (10.7%)	41 (16.5%)	19 (7.4%)	2 (3.5%)
PTA	no	259 (44.2%)	58 (27.2%)	78 (36.8%)	32 (29.1%)	30 (39.5%)	94 (36.0%)	50 (20.2%)	116 (45.3%)	13 (22.8%)
	yes	242 (41.3%)	75 (35.2%)	103 (48.6%)	29 (26.4%)	29 (38.2%)	79 (30.3%)	160 (64.5%)	113 (44.1%)	18 (31.6%)
	missing	85 (14.5%)	80 (37.6%)	31 (14.6%)	49 (44.5%)	17 (22.4%)	88 (33.7%)	38 (15.3%)	27 (10.5%)	26 (45.6%)
GCS score at baseline	M (SD)	13.5 (3.05)	12.0 (4.52)	13.7 (2.72)	10.4 (4.82)	13.1 (3.45)	12.0 (4.08)	13.5 (3.03)	12.4 (4.53)	11.5 (4.06)
	Mdn [Min, Max]	15.0 [3.00, 15.0]	15.0 [3.00, 15.0]	15.0 [3.00, 15.0]	13.0 [3.00, 15.0]	15.0 [3.00, 15.0]	14.0 [3.00, 15.0]	15.0 [3.00, 15.0]	15.0 [3.00, 15.0]	13.0 [3.00, 15.0]
	missing	16 (2.7%)	1 (0.5%)	8 (3.8%)	7 (6.4%)	1 (1.3%)	0 (0%)	2 (0.8%)	2 (0.8%)	3 (5.3%)
GOSE at six months	M (SD)	6.78 (1.31)	6.42 (1.58)	7.01 (1.37)	6.37 (1.39)	6.63 (1.78)	6.56 (1.63)	6.81 (1.23)	6.69 (1.47)	6.30 (1.68)
	Mdn [Min, Max]	7.00 [3.00, 8.00]	7.00 [3.00, 8.00]	8.00 [3.00, 8.00]	7.00 [3.00, 8.00]	8.00 [3.00, 8.00]	7.00 [3.00, 8.00]	7.00 [3.00, 8.00]	7.00 [3.00, 8.00]	7.00 [3.00, 8.00]
	missing	0 (0%)	1 (0.5%)	0 (0%)	0 (0%)	0 (0%)	0 (0%)	0 (0%)	0 (0%)	0 (0%)
Injury Severity Score	M (SD)	16.8 (12.0)	21.1 (17.5)	13.2 (9.92)	27.9 (17.3)	21.3 (14.0)	22.3 (17.8)	17.5 (14.6)	19.4 (16.4)	24.8 (18.3)
	Mdn [Min, Max]	13.0 [1.00, 75.0]	18.0 [1.00, 75.0]	9.00 [1.00, 50.0]	27.0 [1.00, 75.0]	16.5 [1.00, 66.0]	18.0 [1.00, 75.0]	13.0 [1.00, 75.0]	16.0 [1.00, 75.0]	21.0 [1.00, 66.0]
	missing	0 (0%)	0 (0%)	0 (0%)	19 (17.3%)	0 (0%)	0 (0%)	0 (0%)	0 (0%)	2 (3.5%)
Brain Injury AIS	M (SD)	2.79 (1.22)	3.00 (1.64)	2.82 (1.13)	3.88 (1.36)	3.53 (1.19)	3.07 (1.56)	2.96 (1.11)	2.87 (1.29)	3.73 (1.33)
	Mdn [Min, Max]	3.00 [1.00, 5.00]	3.00 [1.00, 5.00]	3.00 [1.00, 5.00]	4.00 [0, 5.00]	4.00 [1.00, 5.00]	3.00 [1.00, 5.00]	3.00 [1.00, 5.00]	3.00 [1.00, 6.00]	4.00 [1.00, 5.00]
	missing	0 (0%)	0 (0%)	0 (0%)	18 (16.4%)	0 (0%)	0 (0%)	0 (0%)	0 (0%)	2 (3.5%)
Abnormalities on the first CT scan	absent	285 (48.6%)	65 (30.5%)	66 (31.1%)	21 (19.1%)	6 (7.9%)	56 (21.5%)	108 (43.5%)	79 (30.9%)	15 (26.3%)
	present	282 (48.1%)	96 (45.1%)	83 (39.2%)	78 (70.9%)	35 (46.1%)	109 (41.8%)	109 (44.0%)	152 (59.4%)	39 (68.4%)
	missing	19 (3.2%)	52 (24.4%)	63 (29.7%)	11 (10.0%)	35 (46.1%)	96 (36.8%)	31 (12.5%)	25 (9.8%)	3 (5.3%)
Note. ER = emergency room, ADM = admission to a ward, ICU = intensive care unit, LOC = lost of conciousness, PTA = post-traumatic amnesia, GCS = Glasgow Coma Scale, GOSE = Glasgow Outcome Scale - Extended, Brain Injury AIS = Brain Injury Abbreviated Injury Scale, CT = computed tomography, M = mean, SD = standard deviation, Mdn = median, Min = minimum, Max = maximum.

## Sheet: Table 4. RPQ
		Dutch	English	Finnish	French	German	Italian	Norwegian	Spanish	Swedish
Variable	Group/statistics	(N=597)	(N=223)	(N=213)	(N=115)	(N=80)	(N=268)	(N=263)	(N=254)	(N=59)
Sex	female	229 (38.4%)	74 (33.2%)	84 (39.4%)	29 (25.2%)	27 (33.8%)	84 (31.3%)	83 (31.6%)	75 (29.5%)	28 (47.5%)
	male	368 (61.6%)	149 (66.8%)	129 (60.6%)	86 (74.8%)	53 (66.2%)	184 (68.7%)	180 (68.4%)	179 (70.5%)	31 (52.5%)
Age	M (SD)	52.9 (19.1)	48.3 (17.1)	47.7 (19.6)	42.8 (18.0)	57.0 (18.6)	50.2 (20.6)	45.8 (19.9)	47.1 (19.4)	49.2 (18.5)
	Mdn [Min, Max]	57.0 [16.0, 95.0]	51.0 [16.0, 85.0]	50.0 [16.0, 89.0]	43.0 [16.0, 87.0]	59.0 [18.0, 86.0]	53.0 [16.0, 93.0]	48.0 [16.0, 89.0]	44.0 [16.0, 93.0]	50.0 [18.0, 81.0]
Education	post-high school	363 (60.8%)	140 (62.8%)	73 (34.3%)	51 (44.3%)	33 (41.2%)	64 (23.9%)	161 (61.2%)	63 (24.8%)	26 (44.1%)
	secondary school/high school	125 (20.9%)	61 (27.4%)	69 (32.4%)	45 (39.1%)	27 (33.8%)	101 (37.7%)	64 (24.3%)	105 (41.3%)	16 (27.1%)
	primary school/none/unknown	40 (6.7%)	2 (0.9%)	23 (10.8%)	8 (7.0%)	8 (10.0%)	64 (23.9%)	27 (10.3%)	83 (32.7%)	6 (10.2%)
	missing	69 (11.6%)	20 (9.0%)	48 (22.5%)	11 (9.6%)	12 (15.0%)	39 (14.6%)	11 (4.2%)	3 (1.2%)	11 (18.6%)
Employment	full-time employed	192 (32.2%)	119 (53.4%)	89 (41.8%)	56 (48.7%)	25 (31.2%)	103 (38.4%)	130 (49.4%)	130 (51.2%)	36 (61.0%)
	part-time employed	88 (14.7%)	23 (10.3%)	7 (3.3%)	8 (7.0%)	8 (10.0%)	40 (14.9%)	33 (12.5%)	26 (10.2%)	2 (3.4%)
	in training	51 (8.5%)	11 (4.9%)	30 (14.1%)	16 (13.9%)	7 (8.8%)	27 (10.1%)	35 (13.3%)	16 (6.3%)	3 (5.1%)
	unemployed	42 (7.0%)	18 (8.1%)	14 (6.6%)	12 (10.4%)	4 (5.0%)	16 (6.0%)	18 (6.8%)	23 (9.1%)	0 (0%)
	retired	177 (29.6%)	38 (17.0%)	51 (23.9%)	19 (16.5%)	33 (41.2%)	58 (21.6%)	42 (16.0%)	54 (21.3%)	12 (20.3%)
	missing	47 (7.9%)	14 (6.3%)	22 (10.3%)	4 (3.5%)	3 (3.8%)	24 (9.0%)	5 (1.9%)	5 (2.0%)	6 (10.2%)
Marital status	partnered	325 (54.4%)	114 (51.1%)	104 (48.8%)	56 (48.7%)	46 (57.5%)	134 (50.0%)	130 (49.4%)	121 (47.6%)	29 (49.2%)
	single	270 (45.2%)	109 (48.9%)	109 (51.2%)	57 (49.6%)	34 (42.5%)	134 (50.0%)	133 (50.6%)	133 (52.4%)	30 (50.8%)
	missing	2 (0.3%)	0 (0%)	0 (0%)	2 (1.7%)	0 (0%)	0 (0%)	0 (0%)	0 (0%)	0 (0%)
Living situation	not alone	454 (76.0%)	176 (78.9%)	151 (70.9%)	95 (82.6%)	63 (78.8%)	227 (84.7%)	208 (79.1%)	217 (85.4%)	42 (71.2%)
	alone	143 (24.0%)	47 (21.1%)	62 (29.1%)	18 (15.7%)	17 (21.2%)	41 (15.3%)	55 (20.9%)	37 (14.6%)	17 (28.8%)
	missing	0 (0%)	0 (0%)	0 (0%)	2 (1.7%)	0 (0%)	0 (0%)	0 (0%)	0 (0%)	0 (0%)
Premorbid psychological problems	no	532 (89.1%)	167 (74.9%)	181 (85.0%)	93 (80.9%)	72 (90.0%)	243 (90.7%)	224 (85.2%)	223 (87.8%)	48 (81.4%)
	yes	62 (10.4%)	51 (22.9%)	32 (15.0%)	17 (14.8%)	7 (8.8%)	25 (9.3%)	34 (12.9%)	30 (11.8%)	9 (15.3%)
	missing	3 (0.5%)	5 (2.2%)	0 (0%)	5 (4.3%)	1 (1.2%)	0 (0%)	5 (1.9%)	1 (0.4%)	2 (3.4%)
Admission type	ER	102 (17.1%)	62 (27.8%)	51 (23.9%)	12 (10.4%)	12 (15.0%)	67 (25.0%)	66 (25.1%)	71 (28.0%)	14 (23.7%)
	ADM	308 (51.6%)	74 (33.2%)	99 (46.5%)	6 (5.2%)	18 (22.5%)	57 (21.3%)	114 (43.3%)	54 (21.3%)	13 (22.0%)
	ICU	187 (31.3%)	87 (39.0%)	63 (29.6%)	97 (84.3%)	50 (62.5%)	144 (53.7%)	83 (31.6%)	129 (50.8%)	32 (54.2%)
Injury cause	road traffic accident	238 (39.9%)	104 (46.6%)	70 (32.9%)	48 (41.7%)	25 (31.2%)	135 (50.4%)	105 (39.9%)	107 (42.1%)	22 (37.3%)
	incidental fall	287 (48.1%)	88 (39.5%)	98 (46.0%)	53 (46.1%)	44 (55.0%)	95 (35.4%)	111 (42.2%)	116 (45.7%)	27 (45.8%)
	other non-intentional injury	22 (3.7%)	13 (5.8%)	16 (7.5%)	4 (3.5%)	6 (7.5%)	11 (4.1%)	18 (6.8%)	6 (2.4%)	3 (5.1%)
	violence/assault	14 (2.3%)	10 (4.5%)	13 (6.1%)	3 (2.6%)	2 (2.5%)	3 (1.1%)	13 (4.9%)	9 (3.5%)	2 (3.4%)
	act of mass violence	0 (0%)	0 (0%)	1 (0.5%)	0 (0%)	0 (0%)	0 (0%)	0 (0%)	0 (0%)	0 (0%)
	suicide attempt	4 (0.7%)	0 (0%)	1 (0.5%)	0 (0%)	0 (0%)	7 (2.6%)	0 (0%)	7 (2.8%)	0 (0%)
	other	27 (4.5%)	5 (2.2%)	6 (2.8%)	3 (2.6%)	3 (3.8%)	10 (3.7%)	12 (4.6%)	3 (1.2%)	2 (3.4%)
	missing	5 (0.8%)	3 (1.3%)	8 (3.8%)	4 (3.5%)	0 (0%)	7 (2.6%)	4 (1.5%)	6 (2.4%)	3 (5.1%)
LOC	no	199 (33.3%)	47 (21.1%)	66 (31.0%)	20 (17.4%)	30 (37.5%)	128 (47.8%)	42 (16.0%)	97 (38.2%)	20 (33.9%)
	yes	356 (59.6%)	150 (67.3%)	138 (64.8%)	77 (67.0%)	43 (53.8%)	112 (41.8%)	177 (67.3%)	138 (54.3%)	37 (62.7%)
	missing	42 (7.0%)	26 (11.7%)	9 (4.2%)	18 (15.7%)	7 (8.8%)	28 (10.4%)	44 (16.7%)	19 (7.5%)	2 (3.4%)
PTA	no	262 (43.9%)	64 (28.7%)	79 (37.1%)	32 (27.8%)	33 (41.2%)	96 (35.8%)	53 (20.2%)	115 (45.3%)	13 (22.0%)
	yes	245 (41.0%)	80 (35.9%)	102 (47.9%)	30 (26.1%)	30 (37.5%)	80 (29.9%)	166 (63.1%)	112 (44.1%)	19 (32.2%)
	missing	90 (15.1%)	79 (35.4%)	32 (15.0%)	53 (46.1%)	17 (21.2%)	92 (34.3%)	44 (16.7%)	27 (10.6%)	27 (45.8%)
GCS score at baseline	M (SD)	13.4 (3.09)	12.2 (4.38)	13.7 (2.73)	10.3 (4.82)	13.2 (3.39)	11.9 (4.13)	13.4 (3.13)	12.4 (4.51)	11.4 (4.03)
	Mdn [Min, Max]	15.0 [3.00, 15.0]	15.0 [3.00, 15.0]	15.0 [3.00, 15.0]	13.0 [3.00, 15.0]	15.0 [3.00, 15.0]	14.0 [3.00, 15.0]	15.0 [3.00, 15.0]	15.0 [3.00, 15.0]	13.0 [3.00, 15.0]
	missing	15 (2.5%)	1 (0.4%)	8 (3.8%)	8 (7.0%)	1 (1.2%)	0 (0%)	2 (0.8%)	2 (0.8%)	3 (5.1%)
GOSE at six months	M (SD)	6.77 (1.31)	6.42 (1.59)	6.99 (1.39)	6.25 (1.49)	6.70 (1.76)	6.48 (1.67)	6.75 (1.31)	6.70 (1.45)	6.25 (1.67)
	Mdn [Min, Max]	7.00 [3.00, 8.00]	7.00 [3.00, 8.00]	8.00 [3.00, 8.00]	6.00 [3.00, 8.00]	8.00 [3.00, 8.00]	7.00 [3.00, 8.00]	7.00 [3.00, 8.00]	7.00 [3.00, 8.00]	7.00 [3.00, 8.00]
	missing	0 (0%)	1 (0.4%)	0 (0%)	0 (0%)	0 (0%)	0 (0%)	0 (0%)	0 (0%)	0 (0%)
Injury Severity Score	M (SD)	17.0 (12.1)	20.5 (17.4)	13.3 (9.94)	27.9 (17.0)	20.7 (14.0)	22.8 (18.0)	17.6 (14.7)	19.4 (16.3)	24.4 (18.1)
	Mdn [Min, Max]	13.0 [1.00, 75.0]	17.0 [1.00, 75.0]	9.00 [1.00, 50.0]	26.5 [1.00, 75.0]	16.0 [1.00, 66.0]	18.0 [1.00, 75.0]	13.0 [1.00, 75.0]	16.0 [1.00, 75.0]	18.0 [1.00, 66.0]
	missing	0 (0%)	0 (0%)	0 (0%)	21 (18.3%)	0 (0%)	0 (0%)	0 (0%)	0 (0%)	2 (3.4%)
Brain Injury AIS	M (SD)	2.82 (1.23)	2.94 (1.63)	2.84 (1.13)	3.92 (1.35)	3.48 (1.20)	3.11 (1.56)	2.97 (1.12)	2.87 (1.29)	3.72 (1.31)
	Mdn [Min, Max]	3.00 [1.00, 5.00]	3.00 [1.00, 5.00]	3.00 [1.00, 5.00]	4.00 [0, 5.00]	4.00 [1.00, 5.00]	3.00 [1.00, 5.00]	3.00 [1.00, 5.00]	3.00 [1.00, 6.00]	4.00 [1.00, 5.00]
	missing	0 (0%)	0 (0%)	0 (0%)	20 (17.4%)	0 (0%)	0 (0%)	0 (0%)	0 (0%)	2 (3.4%)
Abnormalities on the first CT scan	absent	288 (48.2%)	74 (33.2%)	65 (30.5%)	23 (20.0%)	8 (10.0%)	56 (20.9%)	115 (43.7%)	78 (30.7%)	15 (25.4%)
	present	290 (48.6%)	98 (43.9%)	85 (39.9%)	80 (69.6%)	35 (43.8%)	116 (43.3%)	117 (44.5%)	152 (59.8%)	41 (69.5%)
	missing	19 (3.2%)	51 (22.9%)	63 (29.6%)	12 (10.4%)	37 (46.2%)	96 (35.8%)	31 (11.8%)	24 (9.4%)	3 (5.1%)
Note. ER = emergency room, ADM = admission to a ward, ICU = intensive care unit, LOC = lost of conciousness, PTA = post-traumatic amnesia, GCS = Glasgow Coma Scale, GOSE = Glasgow Outcome Scale - Extended, Brain Injury AIS = Brain Injury Abbreviated Injury Scale, CT = computed tomography, M = mean, SD = standard deviation, Mdn = median, Min = minimum, Max = maximum.

## Sheet: Table 5. QOLIBRI
		Dutch	English	Finnish	French	German	Italian	Norwegian	Spanish	Swedish
Variable	Group/statistics	(N=583)	(N=224)	(N=207)	(N=104)	(N=77)	(N=271)	(N=247)	(N=255)	(N=57)
Sex	female	221 (37.9%)	75 (33.5%)	82 (39.6%)	26 (25.0%)	24 (31.2%)	85 (31.4%)	80 (32.4%)	75 (29.4%)	27 (47.4%)
	male	362 (62.1%)	149 (66.5%)	125 (60.4%)	78 (75.0%)	53 (68.8%)	186 (68.6%)	167 (67.6%)	180 (70.6%)	30 (52.6%)
Age	M (SD)	53.1 (18.9)	48.1 (17.1)	47.7 (19.5)	43.4 (18.2)	57.7 (18.2)	49.3 (20.8)	45.7 (19.5)	47.0 (19.4)	49.6 (18.5)
	Mdn [Min, Max]	57.0 [16.0, 95.0]	51.0 [16.0, 85.0]	50.0 [16.0, 89.0]	43.0 [16.0, 87.0]	59.0 [18.0, 86.0]	51.0 [16.0, 93.0]	48.0 [16.0, 85.0]	44.0 [16.0, 93.0]	50.0 [18.0, 81.0]
Education	post-high school	352 (60.4%)	142 (63.4%)	69 (33.3%)	47 (45.2%)	30 (39.0%)	66 (24.4%)	152 (61.5%)	65 (25.5%)	25 (43.9%)
	secondary school/high school	125 (21.4%)	62 (27.7%)	68 (32.9%)	39 (37.5%)	27 (35.1%)	103 (38.0%)	62 (25.1%)	105 (41.2%)	15 (26.3%)
	primary school/none/unknown	39 (6.7%)	0 (0%)	22 (10.6%)	7 (6.7%)	7 (9.1%)	64 (23.6%)	23 (9.3%)	82 (32.2%)	6 (10.5%)
	missing	67 (11.5%)	20 (8.9%)	48 (23.2%)	11 (10.6%)	13 (16.9%)	38 (14.0%)	10 (4.0%)	3 (1.2%)	11 (19.3%)
Employment	full-time employed	190 (32.6%)	119 (53.1%)	87 (42.0%)	48 (46.2%)	25 (32.5%)	106 (39.1%)	123 (49.8%)	131 (51.4%)	34 (59.6%)
	part-time employed	86 (14.8%)	23 (10.3%)	7 (3.4%)	7 (6.7%)	5 (6.5%)	39 (14.4%)	32 (13.0%)	26 (10.2%)	2 (3.5%)
	in training	48 (8.2%)	11 (4.9%)	28 (13.5%)	15 (14.4%)	6 (7.8%)	30 (11.1%)	34 (13.8%)	16 (6.3%)	3 (5.3%)
	unemployed	41 (7.0%)	19 (8.5%)	14 (6.8%)	11 (10.6%)	4 (5.2%)	17 (6.3%)	16 (6.5%)	23 (9.0%)	0 (0%)
	retired	173 (29.7%)	38 (17.0%)	49 (23.7%)	19 (18.3%)	33 (42.9%)	55 (20.3%)	37 (15.0%)	54 (21.2%)	12 (21.1%)
	missing	45 (7.7%)	14 (6.2%)	22 (10.6%)	4 (3.8%)	4 (5.2%)	24 (8.9%)	5 (2.0%)	5 (2.0%)	6 (10.5%)
Marital status	partnered	322 (55.2%)	116 (51.8%)	102 (49.3%)	49 (47.1%)	45 (58.4%)	134 (49.4%)	126 (51.0%)	121 (47.5%)	28 (49.1%)
	single	259 (44.4%)	108 (48.2%)	105 (50.7%)	53 (51.0%)	32 (41.6%)	137 (50.6%)	121 (49.0%)	134 (52.5%)	29 (50.9%)
	missing	2 (0.3%)	0 (0%)	0 (0%)	2 (1.9%)	0 (0%)	0 (0%)	0 (0%)	0 (0%)	0 (0%)
Living situation	not alone	447 (76.7%)	178 (79.5%)	147 (71.0%)	87 (83.7%)	61 (79.2%)	230 (84.9%)	200 (81.0%)	218 (85.5%)	40 (70.2%)
	alone	136 (23.3%)	46 (20.5%)	60 (29.0%)	15 (14.4%)	16 (20.8%)	41 (15.1%)	47 (19.0%)	37 (14.5%)	17 (29.8%)
	missing	0 (0%)	0 (0%)	0 (0%)	2 (1.9%)	0 (0%)	0 (0%)	0 (0%)	0 (0%)	0 (0%)
Premorbid psychological problems	no	522 (89.5%)	168 (75.0%)	179 (86.5%)	85 (81.7%)	69 (89.6%)	246 (90.8%)	210 (85.0%)	224 (87.8%)	46 (80.7%)
	yes	57 (9.8%)	51 (22.8%)	28 (13.5%)	16 (15.4%)	7 (9.1%)	25 (9.2%)	33 (13.4%)	30 (11.8%)	9 (15.8%)
	missing	4 (0.7%)	5 (2.2%)	0 (0%)	3 (2.9%)	1 (1.3%)	0 (0%)	4 (1.6%)	1 (0.4%)	2 (3.5%)
Admission type	ER	96 (16.5%)	60 (26.8%)	47 (22.7%)	12 (11.5%)	10 (13.0%)	69 (25.5%)	61 (24.7%)	72 (28.2%)	14 (24.6%)
	ADM	305 (52.3%)	72 (32.1%)	97 (46.9%)	5 (4.8%)	15 (19.5%)	60 (22.1%)	109 (44.1%)	55 (21.6%)	12 (21.1%)
	ICU	182 (31.2%)	92 (41.1%)	63 (30.4%)	87 (83.7%)	52 (67.5%)	142 (52.4%)	77 (31.2%)	128 (50.2%)	31 (54.4%)
Injury cause	road traffic accident	231 (39.6%)	105 (46.9%)	67 (32.4%)	42 (40.4%)	22 (28.6%)	138 (50.9%)	101 (40.9%)	109 (42.7%)	21 (36.8%)
	incidental fall	282 (48.4%)	85 (37.9%)	97 (46.9%)	49 (47.1%)	44 (57.1%)	94 (34.7%)	102 (41.3%)	116 (45.5%)	26 (45.6%)
	other non-intentional injury	22 (3.8%)	13 (5.8%)	16 (7.7%)	4 (3.8%)	7 (9.1%)	13 (4.8%)	18 (7.3%)	6 (2.4%)	3 (5.3%)
	violence/assault	14 (2.4%)	11 (4.9%)	12 (5.8%)	3 (2.9%)	2 (2.6%)	3 (1.1%)	12 (4.9%)	9 (3.5%)	2 (3.5%)
	act of mass violence	0 (0%)	0 (0%)	1 (0.5%)	0 (0%)	0 (0%)	0 (0%)	0 (0%)	0 (0%)	0 (0%)
	suicide attempt	4 (0.7%)	1 (0.4%)	1 (0.5%)	0 (0%)	0 (0%)	7 (2.6%)	0 (0%)	7 (2.7%)	0 (0%)
	other	26 (4.5%)	6 (2.7%)	6 (2.9%)	3 (2.9%)	2 (2.6%)	9 (3.3%)	11 (4.5%)	3 (1.2%)	2 (3.5%)
	missing	4 (0.7%)	3 (1.3%)	7 (3.4%)	3 (2.9%)	0 (0%)	7 (2.6%)	3 (1.2%)	5 (2.0%)	3 (5.3%)
LOC	no	192 (32.9%)	49 (21.9%)	63 (30.4%)	19 (18.3%)	30 (39.0%)	130 (48.0%)	37 (15.0%)	99 (38.8%)	20 (35.1%)
	yes	351 (60.2%)	147 (65.6%)	136 (65.7%)	70 (67.3%)	41 (53.2%)	113 (41.7%)	170 (68.8%)	138 (54.1%)	35 (61.4%)
	missing	40 (6.9%)	28 (12.5%)	8 (3.9%)	15 (14.4%)	6 (7.8%)	28 (10.3%)	40 (16.2%)	18 (7.1%)	2 (3.5%)
PTA	no	256 (43.9%)	62 (27.7%)	75 (36.2%)	29 (27.9%)	30 (39.0%)	98 (36.2%)	49 (19.8%)	116 (45.5%)	13 (22.8%)
	yes	239 (41.0%)	80 (35.7%)	99 (47.8%)	26 (25.0%)	29 (37.7%)	85 (31.4%)	161 (65.2%)	112 (43.9%)	18 (31.6%)
	missing	88 (15.1%)	82 (36.6%)	33 (15.9%)	49 (47.1%)	18 (23.4%)	88 (32.5%)	37 (15.0%)	27 (10.6%)	26 (45.6%)
GCS score at baseline	M (SD)	13.4 (3.14)	12.1 (4.48)	13.6 (2.86)	10.2 (4.86)	13.0 (3.53)	12.0 (4.12)	13.5 (3.03)	12.3 (4.54)	11.5 (3.97)
	Mdn [Min, Max]	15.0 [3.00, 15.0]	15.0 [3.00, 15.0]	15.0 [3.00, 15.0]	12.5 [3.00, 15.0]	15.0 [3.00, 15.0]	14.0 [3.00, 15.0]	15.0 [3.00, 15.0]	15.0 [3.00, 15.0]	13.0 [3.00, 15.0]
	missing	15 (2.6%)	2 (0.9%)	8 (3.9%)	8 (7.7%)	1 (1.3%)	0 (0%)	2 (0.8%)	2 (0.8%)	3 (5.3%)
GOSE at six months	M (SD)	6.75 (1.33)	6.42 (1.59)	7.01 (1.38)	6.20 (1.52)	6.60 (1.76)	6.57 (1.62)	6.81 (1.24)	6.70 (1.46)	6.32 (1.64)
	Mdn [Min, Max]	7.00 [3.00, 8.00]	7.00 [3.00, 8.00]	8.00 [3.00, 8.00]	6.00 [3.00, 8.00]	8.00 [3.00, 8.00]	7.00 [3.00, 8.00]	7.00 [3.00, 8.00]	7.00 [3.00, 8.00]	7.00 [3.00, 8.00]
	missing	0 (0%)	1 (0.4%)	0 (0%)	0 (0%)	0 (0%)	1 (0.4%)	0 (0%)	0 (0%)	0 (0%)
Injury Severity Score	M (SD)	17.0 (12.0)	21.0 (17.5)	13.4 (10.1)	28.5 (18.3)	21.5 (13.9)	22.3 (17.6)	17.6 (14.6)	19.4 (16.4)	24.3 (17.9)
	Mdn [Min, Max]	13.0 [1.00, 75.0]	17.0 [1.00, 75.0]	9.00 [1.00, 50.0]	25.0 [1.00, 75.0]	17.0 [1.00, 66.0]	18.0 [1.00, 75.0]	13.0 [1.00, 75.0]	16.0 [1.00, 75.0]	18.0 [1.00, 66.0]
	missing	0 (0%)	0 (0%)	0 (0%)	17 (16.3%)	0 (0%)	0 (0%)	0 (0%)	0 (0%)	2 (3.5%)
Brain Injury AIS	M (SD)	2.82 (1.23)	2.98 (1.63)	2.84 (1.16)	3.93 (1.40)	3.56 (1.15)	3.07 (1.55)	2.96 (1.10)	2.86 (1.29)	3.73 (1.30)
	Mdn [Min, Max]	3.00 [1.00, 5.00]	3.00 [1.00, 5.00]	3.00 [1.00, 5.00]	4.00 [0, 6.00]	4.00 [1.00, 5.00]	3.00 [1.00, 5.00]	3.00 [1.00, 5.00]	3.00 [1.00, 6.00]	4.00 [1.00, 5.00]
	missing	0 (0%)	0 (0%)	0 (0%)	16 (15.4%)	0 (0%)	0 (0%)	0 (0%)	0 (0%)	2 (3.5%)
Abnormalities on the first CT scan	absent	276 (47.3%)	72 (32.1%)	66 (31.9%)	22 (21.2%)	6 (7.8%)	58 (21.4%)	108 (43.7%)	80 (31.4%)	14 (24.6%)
	present	288 (49.4%)	99 (44.2%)	80 (38.6%)	73 (70.2%)	36 (46.8%)	115 (42.4%)	108 (43.7%)	151 (59.2%)	40 (70.2%)
	missing	19 (3.3%)	53 (23.7%)	61 (29.5%)	9 (8.7%)	35 (45.5%)	98 (36.2%)	31 (12.6%)	24 (9.4%)	3 (5.3%)
Note. ER = emergency room, ADM = admission to a ward, ICU = intensive care unit, LOC = lost of conciousness, PTA = post-traumatic amnesia, GCS = Glasgow Coma Scale, GOSE = Glasgow Outcome Scale - Extended, Brain Injury AIS = Brain Injury Abbreviated Injury Scale, CT = computed tomography, M = mean, SD = standard deviation, Mdn = median, Min = minimum, Max = maximum.

## Sheet: Table 6. QOLIBRI-OS
		Dutch	English	Finnish	French	German	Italian	Norwegian	Spanish	Swedish
Variable	Group/statistics	(N=602)	(N=239)	(N=227)	(N=109)	(N=84)	(N=280)	(N=261)	(N=265)	(N=63)
Sex	female	230 (38.2%)	80 (33.5%)	85 (37.4%)	27 (24.8%)	27 (32.1%)	88 (31.4%)	85 (32.6%)	78 (29.4%)	28 (44.4%)
	male	372 (61.8%)	159 (66.5%)	142 (62.6%)	82 (75.2%)	57 (67.9%)	192 (68.6%)	176 (67.4%)	187 (70.6%)	35 (55.6%)
Age	M (SD)	53.1 (18.8)	48.4 (17.1)	47.2 (19.5)	43.3 (18.2)	56.5 (18.4)	49.6 (20.7)	46.0 (19.9)	46.9 (19.4)	49.2 (18.7)
	Mdn [Min, Max]	57.0 [16.0, 95.0]	51.0 [16.0, 85.0]	49.0 [16.0, 89.0]	43.0 [16.0, 87.0]	58.5 [18.0, 86.0]	52.0 [16.0, 93.0]	48.0 [16.0, 89.0]	44.0 [16.0, 93.0]	50.0 [18.0, 81.0]
Education	post-high school	365 (60.6%)	146 (61.1%)	80 (35.2%)	48 (44.0%)	34 (40.5%)	67 (23.9%)	162 (62.1%)	65 (24.5%)	29 (46.0%)
	secondary school/high school	128 (21.3%)	66 (27.6%)	72 (31.7%)	42 (38.5%)	27 (32.1%)	107 (38.2%)	61 (23.4%)	109 (41.1%)	16 (25.4%)
	primary school/none/unknown	39 (6.5%)	2 (0.8%)	23 (10.1%)	7 (6.4%)	9 (10.7%)	66 (23.6%)	27 (10.3%)	86 (32.5%)	7 (11.1%)
	missing	70 (11.6%)	25 (10.5%)	52 (22.9%)	12 (11.0%)	14 (16.7%)	40 (14.3%)	11 (4.2%)	5 (1.9%)	11 (17.5%)
Employment	full-time employed	198 (32.9%)	125 (52.3%)	95 (41.9%)	51 (46.8%)	29 (34.5%)	107 (38.2%)	127 (48.7%)	137 (51.7%)	36 (57.1%)
	part-time employed	90 (15.0%)	25 (10.5%)	9 (4.0%)	7 (6.4%)	6 (7.1%)	42 (15.0%)	33 (12.6%)	26 (9.8%)	2 (3.2%)
	in training	48 (8.0%)	12 (5.0%)	33 (14.5%)	15 (13.8%)	7 (8.3%)	30 (10.7%)	35 (13.4%)	16 (6.0%)	4 (6.3%)
	unemployed	41 (6.8%)	19 (7.9%)	15 (6.6%)	11 (10.1%)	5 (6.0%)	17 (6.1%)	18 (6.9%)	24 (9.1%)	1 (1.6%)
	retired	178 (29.6%)	41 (17.2%)	51 (22.5%)	20 (18.3%)	33 (39.3%)	60 (21.4%)	42 (16.1%)	56 (21.1%)	14 (22.2%)
	missing	47 (7.8%)	17 (7.1%)	24 (10.6%)	5 (4.6%)	4 (4.8%)	24 (8.6%)	6 (2.3%)	6 (2.3%)	6 (9.5%)
Marital status	partnered	333 (55.3%)	123 (51.5%)	111 (48.9%)	52 (47.7%)	49 (58.3%)	138 (49.3%)	130 (49.8%)	127 (47.9%)	31 (49.2%)
	single	267 (44.4%)	116 (48.5%)	116 (51.1%)	54 (49.5%)	35 (41.7%)	142 (50.7%)	131 (50.2%)	138 (52.1%)	32 (50.8%)
	missing	2 (0.3%)	0 (0%)	0 (0%)	3 (2.8%)	0 (0%)	0 (0%)	0 (0%)	0 (0%)	0 (0%)
Living situation	not alone	462 (76.7%)	190 (79.5%)	162 (71.4%)	90 (82.6%)	65 (77.4%)	236 (84.3%)	206 (78.9%)	228 (86.0%)	45 (71.4%)
	alone	140 (23.3%)	49 (20.5%)	65 (28.6%)	16 (14.7%)	19 (22.6%)	44 (15.7%)	55 (21.1%)	37 (14.0%)	18 (28.6%)
	missing	0 (0%)	0 (0%)	0 (0%)	3 (2.8%)	0 (0%)	0 (0%)	0 (0%)	0 (0%)	0 (0%)
Premorbid psychological problems	no	537 (89.2%)	177 (74.1%)	196 (86.3%)	88 (80.7%)	73 (86.9%)	256 (91.4%)	221 (84.7%)	232 (87.5%)	50 (79.4%)
	yes	61 (10.1%)	56 (23.4%)	31 (13.7%)	15 (13.8%)	9 (10.7%)	24 (8.6%)	35 (13.4%)	32 (12.1%)	11 (17.5%)
	missing	4 (0.7%)	6 (2.5%)	0 (0%)	6 (5.5%)	2 (2.4%)	0 (0%)	5 (1.9%)	1 (0.4%)	2 (3.2%)
Admission type	ER	100 (16.6%)	65 (27.2%)	50 (22.0%)	12 (11.0%)	11 (13.1%)	70 (25.0%)	65 (24.9%)	76 (28.7%)	14 (22.2%)
	ADM	308 (51.2%)	76 (31.8%)	106 (46.7%)	6 (5.5%)	19 (22.6%)	61 (21.8%)	114 (43.7%)	55 (20.8%)	13 (20.6%)
	ICU	194 (32.2%)	98 (41.0%)	71 (31.3%)	91 (83.5%)	54 (64.3%)	149 (53.2%)	82 (31.4%)	134 (50.6%)	36 (57.1%)
Injury cause	road traffic accident	243 (40.4%)	109 (45.6%)	77 (33.9%)	43 (39.4%)	26 (31.0%)	147 (52.5%)	105 (40.2%)	113 (42.6%)	23 (36.5%)
	incidental fall	288 (47.8%)	93 (38.9%)	102 (44.9%)	51 (46.8%)	47 (56.0%)	93 (33.2%)	109 (41.8%)	119 (44.9%)	29 (46.0%)
	other non-intentional injury	22 (3.7%)	12 (5.0%)	15 (6.6%)	4 (3.7%)	7 (8.3%)	13 (4.6%)	18 (6.9%)	6 (2.3%)	3 (4.8%)
	violence/assault	14 (2.3%)	13 (5.4%)	14 (6.2%)	3 (2.8%)	2 (2.4%)	3 (1.1%)	13 (5.0%)	11 (4.2%)	3 (4.8%)
	act of mass violence	0 (0%)	0 (0%)	1 (0.4%)	0 (0%)	0 (0%)	0 (0%)	0 (0%)	0 (0%)	0 (0%)
	suicide attempt	4 (0.7%)	1 (0.4%)	1 (0.4%)	0 (0%)	0 (0%)	7 (2.5%)	0 (0%)	7 (2.6%)	0 (0%)
	other	26 (4.3%)	8 (3.3%)	8 (3.5%)	3 (2.8%)	2 (2.4%)	10 (3.6%)	12 (4.6%)	3 (1.1%)	2 (3.2%)
	missing	5 (0.8%)	3 (1.3%)	9 (4.0%)	5 (4.6%)	0 (0%)	7 (2.5%)	4 (1.5%)	6 (2.3%)	3 (4.8%)
LOC	no	203 (33.7%)	50 (20.9%)	68 (30.0%)	20 (18.3%)	31 (36.9%)	134 (47.9%)	41 (15.7%)	101 (38.1%)	21 (33.3%)
	yes	356 (59.1%)	161 (67.4%)	150 (66.1%)	72 (66.1%)	46 (54.8%)	116 (41.4%)	176 (67.4%)	142 (53.6%)	39 (61.9%)
	missing	43 (7.1%)	28 (11.7%)	9 (4.0%)	17 (15.6%)	7 (8.3%)	30 (10.7%)	44 (16.9%)	22 (8.3%)	3 (4.8%)
PTA	no	261 (43.4%)	66 (27.6%)	81 (35.7%)	31 (28.4%)	34 (40.5%)	98 (35.0%)	52 (19.9%)	119 (44.9%)	13 (20.6%)
	yes	245 (40.7%)	81 (33.9%)	111 (48.9%)	27 (24.8%)	31 (36.9%)	85 (30.4%)	167 (64.0%)	114 (43.0%)	20 (31.7%)
	missing	96 (15.9%)	92 (38.5%)	35 (15.4%)	51 (46.8%)	19 (22.6%)	97 (34.6%)	42 (16.1%)	32 (12.1%)	30 (47.6%)
GCS score at baseline	M (SD)	13.3 (3.16)	12.0 (4.53)	13.6 (2.84)	10.3 (4.86)	13.1 (3.59)	11.9 (4.21)	13.4 (3.07)	12.3 (4.60)	11.1 (4.29)
	Mdn [Min, Max]	15.0 [3.00, 15.0]	15.0 [3.00, 15.0]	15.0 [3.00, 15.0]	13.0 [3.00, 15.0]	15.0 [3.00, 15.0]	14.0 [3.00, 15.0]	15.0 [3.00, 15.0]	15.0 [3.00, 15.0]	13.0 [3.00, 15.0]
	missing	17 (2.8%)	1 (0.4%)	8 (3.5%)	10 (9.2%)	1 (1.2%)	0 (0%)	2 (0.8%)	2 (0.8%)	3 (4.8%)
GOSE at six months	M (SD)	6.72 (1.36)	6.37 (1.62)	7.03 (1.36)	6.24 (1.50)	6.75 (1.73)	6.51 (1.67)	6.74 (1.32)	6.63 (1.53)	6.13 (1.77)
	Mdn [Min, Max]	7.00 [3.00, 8.00]	7.00 [3.00, 8.00]	8.00 [3.00, 8.00]	6.00 [3.00, 8.00]	8.00 [3.00, 8.00]	7.00 [3.00, 8.00]	7.00 [3.00, 8.00]	7.00 [3.00, 8.00]	7.00 [3.00, 8.00]
	missing	0 (0%)	1 (0.4%)	0 (0%)	0 (0%)	0 (0%)	1 (0.4%)	0 (0%)	0 (0%)	0 (0%)
Injury Severity Score	M (SD)	17.2 (12.2)	21.0 (17.6)	13.5 (9.94)	28.3 (18.1)	21.2 (13.9)	22.6 (17.9)	17.6 (14.6)	19.5 (16.3)	24.8 (17.6)
	Mdn [Min, Max]	13.5 [1.00, 75.0]	18.0 [1.00, 75.0]	9.00 [1.00, 50.0]	25.5 [1.00, 75.0]	16.5 [1.00, 66.0]	18.0 [1.00, 75.0]	13.0 [1.00, 75.0]	16.0 [1.00, 75.0]	22.0 [1.00, 66.0]
	missing	0 (0%)	0 (0%)	0 (0%)	21 (19.3%)	0 (0%)	0 (0%)	0 (0%)	0 (0%)	2 (3.2%)
Brain Injury AIS	M (SD)	2.84 (1.24)	3.00 (1.64)	2.84 (1.17)	3.92 (1.40)	3.49 (1.15)	3.08 (1.56)	2.97 (1.11)	2.89 (1.31)	3.77 (1.28)
	Mdn [Min, Max]	3.00 [1.00, 5.00]	3.00 [1.00, 5.00]	3.00 [1.00, 5.00]	4.00 [0, 6.00]	4.00 [1.00, 5.00]	3.00 [1.00, 5.00]	3.00 [1.00, 5.00]	3.00 [1.00, 6.00]	4.00 [1.00, 5.00]
	missing	0 (0%)	0 (0%)	0 (0%)	20 (18.3%)	0 (0%)	0 (0%)	0 (0%)	0 (0%)	2 (3.2%)
Abnormalities on the first CT scan	absent	286 (47.5%)	77 (32.2%)	71 (31.3%)	22 (20.2%)	11 (13.1%)	59 (21.1%)	113 (43.3%)	83 (31.3%)	15 (23.8%)
	present	296 (49.2%)	107 (44.8%)	89 (39.2%)	76 (69.7%)	37 (44.0%)	121 (43.2%)	117 (44.8%)	157 (59.2%)	45 (71.4%)
	missing	20 (3.3%)	55 (23.0%)	67 (29.5%)	11 (10.1%)	36 (42.9%)	100 (35.7%)	31 (11.9%)	25 (9.4%)	3 (4.8%)
Note. ER = emergency room, ADM = admission to a ward, ICU = intensive care unit, LOC = lost of conciousness, PTA = post-traumatic amnesia, GCS = Glasgow Coma Scale, GOSE = Glasgow Outcome Scale - Extended, Brain Injury AIS = Brain Injury Abbreviated Injury Scale, CT = computed tomography, M = mean, SD = standard deviation, Mdn = median, Min = minimum, Max = maximum.

## Sheet: Table7. SF-36v2
		Dutch	English	Finnish	French	German	Italian	Norwegian	Spanish	Swedish
Variable	Group/statistics	(N=579)	(N=220)	(N=214)	(N=110)	(N=78)	(N=270)	(N=254)	(N=255)	(N=57)
Sex	female	219 (37.8%)	71 (32.3%)	85 (39.7%)	27 (24.5%)	25 (32.1%)	86 (31.9%)	83 (32.7%)	77 (30.2%)	28 (49.1%)
	male	360 (62.2%)	149 (67.7%)	129 (60.3%)	83 (75.5%)	53 (67.9%)	184 (68.1%)	171 (67.3%)	178 (69.8%)	29 (50.9%)
Age	M (SD)	53.1 (18.9)	48.2 (17.1)	47.9 (19.6)	43.5 (18.0)	57.4 (17.9)	49.6 (20.8)	46.0 (19.8)	47.2 (19.4)	50.4 (18.2)
	Mdn [Min, Max]	57.0 [16.0, 95.0]	51.0 [16.0, 85.0]	50.0 [16.0, 89.0]	43.5 [16.0, 87.0]	59.0 [18.0, 86.0]	52.0 [16.0, 93.0]	48.0 [16.0, 89.0]	44.0 [16.0, 93.0]	50.0 [19.0, 81.0]
Education	post-high school	349 (60.3%)	137 (62.3%)	71 (33.2%)	47 (42.7%)	32 (41.0%)	64 (23.7%)	156 (61.4%)	65 (25.5%)	27 (47.4%)
	secondary school/high school	123 (21.2%)	60 (27.3%)	71 (33.2%)	45 (40.9%)	26 (33.3%)	104 (38.5%)	62 (24.4%)	104 (40.8%)	14 (24.6%)
	primary school/none/unknown	38 (6.6%)	2 (0.9%)	23 (10.7%)	7 (6.4%)	8 (10.3%)	64 (23.7%)	26 (10.2%)	83 (32.5%)	6 (10.5%)
	missing	69 (11.9%)	21 (9.5%)	49 (22.9%)	11 (10.0%)	12 (15.4%)	38 (14.1%)	10 (3.9%)	3 (1.2%)	10 (17.5%)
Employment	full-time employed	188 (32.5%)	115 (52.3%)	89 (41.6%)	52 (47.3%)	27 (34.6%)	102 (37.8%)	125 (49.2%)	130 (51.0%)	35 (61.4%)
	part-time employed	84 (14.5%)	22 (10.0%)	8 (3.7%)	7 (6.4%)	6 (7.7%)	41 (15.2%)	32 (12.6%)	26 (10.2%)	2 (3.5%)
	in training	48 (8.3%)	11 (5.0%)	29 (13.6%)	15 (13.6%)	6 (7.7%)	30 (11.1%)	35 (13.8%)	16 (6.3%)	2 (3.5%)
	unemployed	40 (6.9%)	19 (8.6%)	14 (6.5%)	12 (10.9%)	4 (5.1%)	16 (5.9%)	16 (6.3%)	23 (9.0%)	0 (0%)
	retired	172 (29.7%)	38 (17.3%)	52 (24.3%)	19 (17.3%)	32 (41.0%)	57 (21.1%)	41 (16.1%)	55 (21.6%)	13 (22.8%)
	missing	47 (8.1%)	15 (6.8%)	22 (10.3%)	5 (4.5%)	3 (3.8%)	24 (8.9%)	5 (2.0%)	5 (2.0%)	5 (8.8%)
Marital status	partnered	317 (54.7%)	114 (51.8%)	105 (49.1%)	53 (48.2%)	47 (60.3%)	134 (49.6%)	128 (50.4%)	121 (47.5%)	29 (50.9%)
	single	260 (44.9%)	106 (48.2%)	109 (50.9%)	54 (49.1%)	31 (39.7%)	136 (50.4%)	126 (49.6%)	134 (52.5%)	28 (49.1%)
	missing	2 (0.3%)	0 (0%)	0 (0%)	3 (2.7%)	0 (0%)	0 (0%)	0 (0%)	0 (0%)	0 (0%)
Living situation	not alone	445 (76.9%)	174 (79.1%)	151 (70.6%)	90 (81.8%)	63 (80.8%)	229 (84.8%)	204 (80.3%)	218 (85.5%)	41 (71.9%)
	alone	134 (23.1%)	46 (20.9%)	63 (29.4%)	17 (15.5%)	15 (19.2%)	41 (15.2%)	50 (19.7%)	37 (14.5%)	16 (28.1%)
	missing	0 (0%)	0 (0%)	0 (0%)	3 (2.7%)	0 (0%)	0 (0%)	0 (0%)	0 (0%)	0 (0%)
Premorbid psychological problems	no	516 (89.1%)	167 (75.9%)	183 (85.5%)	87 (79.1%)	70 (89.7%)	245 (90.7%)	217 (85.4%)	224 (87.8%)	46 (80.7%)
	yes	60 (10.4%)	48 (21.8%)	31 (14.5%)	17 (15.5%)	7 (9.0%)	25 (9.3%)	33 (13.0%)	30 (11.8%)	9 (15.8%)
	missing	3 (0.5%)	5 (2.3%)	0 (0%)	6 (5.5%)	1 (1.3%)	0 (0%)	4 (1.6%)	1 (0.4%)	2 (3.5%)
Admission type	ER	96 (16.6%)	58 (26.4%)	50 (23.4%)	12 (10.9%)	11 (14.1%)	67 (24.8%)	63 (24.8%)	72 (28.2%)	14 (24.6%)
	ADM	302 (52.2%)	68 (30.9%)	103 (48.1%)	6 (5.5%)	16 (20.5%)	59 (21.9%)	112 (44.1%)	54 (21.2%)	13 (22.8%)
	ICU	181 (31.3%)	94 (42.7%)	61 (28.5%)	92 (83.6%)	51 (65.4%)	144 (53.3%)	79 (31.1%)	129 (50.6%)	30 (52.6%)
Injury cause	road traffic accident	231 (39.9%)	105 (47.7%)	71 (33.2%)	44 (40.0%)	24 (30.8%)	139 (51.5%)	103 (40.6%)	110 (43.1%)	22 (38.6%)
	incidental fall	280 (48.4%)	81 (36.8%)	100 (46.7%)	51 (46.4%)	44 (56.4%)	92 (34.1%)	107 (42.1%)	115 (45.1%)	25 (43.9%)
	other non-intentional injury	22 (3.8%)	12 (5.5%)	14 (6.5%)	4 (3.6%)	6 (7.7%)	12 (4.4%)	18 (7.1%)	6 (2.4%)	3 (5.3%)
	violence/assault	13 (2.2%)	12 (5.5%)	13 (6.1%)	3 (2.7%)	2 (2.6%)	3 (1.1%)	12 (4.7%)	9 (3.5%)	2 (3.5%)
	act of mass violence	0 (0%)	0 (0%)	1 (0.5%)	0 (0%)	0 (0%)	0 (0%)	0 (0%)	0 (0%)	0 (0%)
	suicide attempt	4 (0.7%)	1 (0.5%)	1 (0.5%)	0 (0%)	0 (0%)	7 (2.6%)	0 (0%)	7 (2.7%)	0 (0%)
	other	25 (4.3%)	6 (2.7%)	6 (2.8%)	3 (2.7%)	2 (2.6%)	10 (3.7%)	11 (4.3%)	3 (1.2%)	2 (3.5%)
	missing	4 (0.7%)	3 (1.4%)	8 (3.7%)	5 (4.5%)	0 (0%)	7 (2.6%)	3 (1.2%)	5 (2.0%)	3 (5.3%)
LOC	no	195 (33.7%)	46 (20.9%)	65 (30.4%)	20 (18.2%)	31 (39.7%)	130 (48.1%)	40 (15.7%)	99 (38.8%)	20 (35.1%)
	yes	342 (59.1%)	146 (66.4%)	140 (65.4%)	72 (65.5%)	41 (52.6%)	113 (41.9%)	172 (67.7%)	137 (53.7%)	34 (59.6%)
	missing	42 (7.3%)	28 (12.7%)	9 (4.2%)	18 (16.4%)	6 (7.7%)	27 (10.0%)	42 (16.5%)	19 (7.5%)	3 (5.3%)
PTA	no	258 (44.6%)	60 (27.3%)	77 (36.0%)	31 (28.2%)	32 (41.0%)	97 (35.9%)	51 (20.1%)	117 (45.9%)	13 (22.8%)
	yes	234 (40.4%)	75 (34.1%)	105 (49.1%)	28 (25.5%)	30 (38.5%)	82 (30.4%)	164 (64.6%)	110 (43.1%)	20 (35.1%)
	missing	87 (15.0%)	85 (38.6%)	32 (15.0%)	51 (46.4%)	16 (20.5%)	91 (33.7%)	39 (15.4%)	28 (11.0%)	24 (42.1%)
GCS score at baseline	M (SD)	13.4 (3.09)	12.0 (4.55)	13.7 (2.72)	10.3 (4.86)	13.1 (3.58)	11.9 (4.18)	13.5 (3.00)	12.3 (4.58)	11.9 (3.75)
	Mdn [Min, Max]	15.0 [3.00, 15.0]	15.0 [3.00, 15.0]	15.0 [3.00, 15.0]	13.0 [3.00, 15.0]	15.0 [3.00, 15.0]	14.0 [3.00, 15.0]	15.0 [3.00, 15.0]	15.0 [3.00, 15.0]	13.5 [3.00, 15.0]
	missing	15 (2.6%)	2 (0.9%)	8 (3.7%)	10 (9.1%)	1 (1.3%)	0 (0%)	2 (0.8%)	2 (0.8%)	3 (5.3%)
GOSE at six months	M (SD)	6.75 (1.33)	6.40 (1.60)	6.98 (1.40)	6.16 (1.51)	6.65 (1.77)	6.51 (1.66)	6.79 (1.26)	6.68 (1.48)	6.44 (1.56)
	Mdn [Min, Max]	7.00 [3.00, 8.00]	7.00 [3.00, 8.00]	8.00 [3.00, 8.00]	6.00 [3.00, 8.00]	8.00 [3.00, 8.00]	7.00 [3.00, 8.00]	7.00 [3.00, 8.00]	7.00 [3.00, 8.00]	7.00 [3.00, 8.00]
	missing	0 (0%)	1 (0.5%)	0 (0%)	0 (0%)	0 (0%)	1 (0.4%)	0 (0%)	0 (0%)	0 (0%)
Injury Severity Score	M (SD)	17.1 (12.2)	21.3 (17.7)	13.3 (9.90)	28.3 (18.0)	20.8 (14.1)	22.6 (17.6)	17.4 (14.5)	19.5 (16.4)	23.5 (17.5)
	Mdn [Min, Max]	13.0 [1.00, 75.0]	18.0 [1.00, 75.0]	9.00 [1.00, 50.0]	25.5 [1.00, 75.0]	16.0 [1.00, 66.0]	18.0 [1.00, 75.0]	13.0 [1.00, 75.0]	16.0 [1.00, 75.0]	17.0 [1.00, 66.0]
	missing	0 (0%)	0 (0%)	0 (0%)	22 (20.0%)	0 (0%)	0 (0%)	0 (0%)	0 (0%)	2 (3.5%)
Brain Injury AIS	M (SD)	2.82 (1.23)	3.01 (1.65)	2.83 (1.13)	3.91 (1.40)	3.47 (1.18)	3.11 (1.55)	2.96 (1.11)	2.87 (1.29)	3.65 (1.29)
	Mdn [Min, Max]	3.00 [1.00, 5.00]	3.00 [1.00, 5.00]	3.00 [1.00, 5.00]	4.00 [0, 6.00]	4.00 [1.00, 5.00]	3.00 [1.00, 5.00]	3.00 [1.00, 5.00]	3.00 [1.00, 6.00]	4.00 [1.00, 5.00]
	missing	0 (0%)	0 (0%)	0 (0%)	21 (19.1%)	0 (0%)	0 (0%)	0 (0%)	0 (0%)	2 (3.5%)
Abnormalities on the first CT scan	absent	276 (47.7%)	68 (30.9%)	67 (31.3%)	23 (20.9%)	6 (7.7%)	55 (20.4%)	110 (43.3%)	80 (31.4%)	15 (26.3%)
	present	284 (49.1%)	100 (45.5%)	85 (39.7%)	76 (69.1%)	37 (47.4%)	116 (43.0%)	113 (44.5%)	153 (60.0%)	39 (68.4%)
	missing	19 (3.3%)	52 (23.6%)	62 (29.0%)	11 (10.0%)	35 (44.9%)	99 (36.7%)	31 (12.2%)	22 (8.6%)	3 (5.3%)
Note. ER = emergency room, ADM = admission to a ward, ICU = intensive care unit, LOC = lost of conciousness, PTA = post-traumatic amnesia, GCS = Glasgow Coma Scale, GOSE = Glasgow Outcome Scale - Extended, Brain Injury AIS = Brain Injury Abbreviated Injury Scale, CT = computed tomography, M = mean, SD = standard deviation, Mdn = median, Min = minimum, Max = maximum.

## Sheet: Table 8. SF-12v2
		Dutch	English	Finnish	French	German	Italian	Norwegian	Spanish	Swedish
Variable	Group/statistics	(N=241)	(N=54)	(N=172)	(N=30)	(N=68)	(N=138)	(N=32)	(N=210)	(N=15)
Sex	female	89 (36.9%)	22 (40.7%)	64 (37.2%)	6 (20.0%)	22 (32.4%)	41 (29.7%)	11 (34.4%)	60 (28.6%)	4 (26.7%)
	male	152 (63.1%)	32 (59.3%)	108 (62.8%)	24 (80.0%)	46 (67.6%)	97 (70.3%)	21 (65.6%)	150 (71.4%)	11 (73.3%)
Age	M (SD)	50.0 (18.4)	48.7 (17.8)	48.3 (20.0)	44.9 (18.6)	58.2 (18.7)	48.0 (19.9)	48.6 (18.6)	47.3 (19.2)	44.7 (19.8)
	Mdn [Min, Max]	54.0 [16.0, 84.0]	51.0 [18.0, 83.0]	49.0 [16.0, 89.0]	50.0 [16.0, 80.0]	59.5 [18.0, 87.0]	48.0 [16.0, 93.0]	48.0 [16.0, 89.0]	44.0 [16.0, 93.0]	46.0 [19.0, 73.0]
Education	post-high school	128 (53.1%)	23 (42.6%)	65 (37.8%)	15 (50.0%)	34 (50.0%)	32 (23.2%)	16 (50.0%)	43 (20.5%)	9 (60.0%)
	secondary school/high school	72 (29.9%)	18 (33.3%)	47 (27.3%)	10 (33.3%)	21 (30.9%)	51 (37.0%)	6 (18.8%)	97 (46.2%)	3 (20.0%)
	primary school/none/unknown	19 (7.9%)	1 (1.9%)	19 (11.0%)	0 (0%)	5 (7.4%)	35 (25.4%)	5 (15.6%)	69 (32.9%)	2 (13.3%)
	missing	22 (9.1%)	12 (22.2%)	41 (23.8%)	5 (16.7%)	8 (11.8%)	20 (14.5%)	5 (15.6%)	1 (0.5%)	1 (6.7%)
Employment	full-time employed	84 (34.9%)	22 (40.7%)	69 (40.1%)	12 (40.0%)	20 (29.4%)	65 (47.1%)	13 (40.6%)	109 (51.9%)	10 (66.7%)
	part-time employed	35 (14.5%)	6 (11.1%)	7 (4.1%)	2 (6.7%)	6 (8.8%)	17 (12.3%)	7 (21.9%)	23 (11.0%)	0 (0%)
	in training	24 (10.0%)	2 (3.7%)	23 (13.4%)	4 (13.3%)	5 (7.4%)	11 (8.0%)	2 (6.2%)	10 (4.8%)	0 (0%)
	unemployed	24 (10.0%)	6 (11.1%)	11 (6.4%)	2 (6.7%)	4 (5.9%)	7 (5.1%)	4 (12.5%)	21 (10.0%)	0 (0%)
	retired	57 (23.7%)	8 (14.8%)	45 (26.2%)	6 (20.0%)	30 (44.1%)	28 (20.3%)	5 (15.6%)	43 (20.5%)	4 (26.7%)
	missing	17 (7.1%)	10 (18.5%)	17 (9.9%)	4 (13.3%)	3 (4.4%)	10 (7.2%)	1 (3.1%)	4 (1.9%)	1 (6.7%)
Marital status	partnered	122 (50.6%)	27 (50.0%)	82 (47.7%)	13 (43.3%)	41 (60.3%)	67 (48.6%)	17 (53.1%)	103 (49.0%)	8 (53.3%)
	single	119 (49.4%)	27 (50.0%)	90 (52.3%)	15 (50.0%)	27 (39.7%)	71 (51.4%)	15 (46.9%)	107 (51.0%)	7 (46.7%)
	missing	0 (0%)	0 (0%)	0 (0%)	2 (6.7%)	0 (0%)	0 (0%)	0 (0%)	0 (0%)	0 (0%)
Living situation	not alone	188 (78.0%)	45 (83.3%)	121 (70.3%)	25 (83.3%)	56 (82.4%)	117 (84.8%)	23 (71.9%)	183 (87.1%)	12 (80.0%)
	alone	53 (22.0%)	9 (16.7%)	51 (29.7%)	3 (10.0%)	12 (17.6%)	21 (15.2%)	9 (28.1%)	27 (12.9%)	3 (20.0%)
	missing	0 (0%)	0 (0%)	0 (0%)	2 (6.7%)	0 (0%)	0 (0%)	0 (0%)	0 (0%)	0 (0%)
Premorbid psychological problems	no	210 (87.1%)	38 (70.4%)	142 (82.6%)	20 (66.7%)	61 (89.7%)	129 (93.5%)	25 (78.1%)	194 (92.4%)	12 (80.0%)
	yes	29 (12.0%)	13 (24.1%)	30 (17.4%)	6 (20.0%)	7 (10.3%)	9 (6.5%)	4 (12.5%)	16 (7.6%)	1 (6.7%)
	missing	2 (0.8%)	3 (5.6%)	0 (0%)	4 (13.3%)	0 (0%)	0 (0%)	3 (9.4%)	0 (0%)	2 (13.3%)
Admission type	ER	61 (25.3%)	11 (20.4%)	44 (25.6%)	8 (26.7%)	6 (8.8%)	16 (11.6%)	1 (3.1%)	56 (26.7%)	2 (13.3%)
	ADM	71 (29.5%)	15 (27.8%)	77 (44.8%)	4 (13.3%)	16 (23.5%)	19 (13.8%)	15 (46.9%)	49 (23.3%)	0 (0%)
	ICU	109 (45.2%)	28 (51.9%)	51 (29.7%)	18 (60.0%)	46 (67.6%)	103 (74.6%)	16 (50.0%)	105 (50.0%)	13 (86.7%)
Injury cause	road traffic accident	103 (42.7%)	21 (38.9%)	56 (32.6%)	8 (26.7%)	16 (23.5%)	77 (55.8%)	7 (21.9%)	92 (43.8%)	6 (40.0%)
	incidental fall	102 (42.3%)	24 (44.4%)	76 (44.2%)	16 (53.3%)	42 (61.8%)	44 (31.9%)	15 (46.9%)	92 (43.8%)	3 (20.0%)
	other non-intentional injury	11 (4.6%)	2 (3.7%)	11 (6.4%)	1 (3.3%)	6 (8.8%)	4 (2.9%)	4 (12.5%)	5 (2.4%)	0 (0%)
	violence/assault	5 (2.1%)	2 (3.7%)	10 (5.8%)	1 (3.3%)	2 (2.9%)	2 (1.4%)	1 (3.1%)	8 (3.8%)	1 (6.7%)
	act of mass violence	0 (0%)	0 (0%)	1 (0.6%)	0 (0%)	0 (0%)	0 (0%)	0 (0%)	0 (0%)	0 (0%)
	suicide attempt	4 (1.7%)	0 (0%)	1 (0.6%)	0 (0%)	0 (0%)	4 (2.9%)	0 (0%)	6 (2.9%)	0 (0%)
	other	13 (5.4%)	4 (7.4%)	8 (4.7%)	1 (3.3%)	2 (2.9%)	3 (2.2%)	4 (12.5%)	2 (1.0%)	2 (13.3%)
	missing	3 (1.2%)	1 (1.9%)	9 (5.2%)	3 (10.0%)	0 (0%)	4 (2.9%)	1 (3.1%)	5 (2.4%)	3 (20.0%)
LOC	no	73 (30.3%)	14 (25.9%)	52 (30.2%)	5 (16.7%)	26 (38.2%)	62 (44.9%)	3 (9.4%)	84 (40.0%)	2 (13.3%)
	yes	158 (65.6%)	29 (53.7%)	118 (68.6%)	19 (63.3%)	37 (54.4%)	53 (38.4%)	24 (75.0%)	116 (55.2%)	10 (66.7%)
	missing	10 (4.1%)	11 (20.4%)	2 (1.2%)	6 (20.0%)	5 (7.4%)	23 (16.7%)	5 (15.6%)	10 (4.8%)	3 (20.0%)
PTA	no	87 (36.1%)	13 (24.1%)	65 (37.8%)	10 (33.3%)	23 (33.8%)	40 (29.0%)	5 (15.6%)	93 (44.3%)	1 (6.7%)
	yes	98 (40.7%)	10 (18.5%)	82 (47.7%)	3 (10.0%)	32 (47.1%)	30 (21.7%)	17 (53.1%)	102 (48.6%)	1 (6.7%)
	missing	56 (23.2%)	31 (57.4%)	25 (14.5%)	17 (56.7%)	13 (19.1%)	68 (49.3%)	10 (31.2%)	15 (7.1%)	13 (86.7%)
GCS score at baseline	M (SD)	12.7 (3.72)	10.6 (5.19)	13.7 (2.81)	11.3 (4.90)	13.3 (3.30)	10.8 (4.25)	11.4 (4.34)	12.2 (4.66)	9.58 (4.64)
	Mdn [Min, Max]	15.0 [3.00, 15.0]	14.0 [3.00, 15.0]	15.0 [3.00, 15.0]	14.0 [3.00, 15.0]	15.0 [3.00, 15.0]	12.0 [3.00, 15.0]	14.0 [3.00, 15.0]	15.0 [3.00, 15.0]	10.5 [3.00, 15.0]
	missing	12 (5.0%)	0 (0%)	4 (2.3%)	3 (10.0%)	1 (1.5%)	0 (0%)	0 (0%)	1 (0.5%)	3 (20.0%)
GOSE at six months	M (SD)	6.54 (1.49)	6.00 (1.76)	7.04 (1.42)	6.27 (1.44)	6.62 (1.86)	6.22 (1.71)	6.53 (1.32)	6.68 (1.48)	5.67 (1.88)
	Mdn [Min, Max]	7.00 [3.00, 8.00]	6.00 [3.00, 8.00]	8.00 [3.00, 8.00]	7.00 [4.00, 8.00]	8.00 [3.00, 8.00]	7.00 [3.00, 8.00]	7.00 [3.00, 8.00]	7.00 [3.00, 8.00]	6.00 [3.00, 8.00]
	missing	0 (0%)	0 (0%)	0 (0%)	0 (0%)	0 (0%)	0 (0%)	0 (0%)	0 (0%)	0 (0%)
Injury Severity Score	M (SD)	19.2 (14.4)	23.9 (16.9)	12.9 (9.71)	22.4 (21.5)	18.2 (12.3)	28.0 (17.0)	23.6 (16.9)	19.8 (16.2)	41.8 (13.9)
	Mdn [Min, Max]	17.0 [1.00, 75.0]	25.0 [1.00, 75.0]	9.00 [1.00, 50.0]	16.0 [1.00, 75.0]	16.0 [1.00, 57.0]	25.0 [1.00, 75.0]	21.0 [1.00, 66.0]	16.0 [1.00, 75.0]	41.0 [25.0, 66.0]
	missing	0 (0%)	0 (0%)	0 (0%)	8 (26.7%)	0 (0%)	0 (0%)	0 (0%)	0 (0%)	2 (13.3%)
Brain Injury AIS	M (SD)	2.90 (1.41)	3.46 (1.53)	2.78 (1.17)	3.23 (1.72)	3.43 (1.24)	3.67 (1.45)	3.31 (1.26)	2.87 (1.22)	4.85 (0.376)
	Mdn [Min, Max]	3.00 [1.00, 5.00]	3.00 [1.00, 5.00]	3.00 [1.00, 5.00]	4.00 [1.00, 5.00]	4.00 [1.00, 5.00]	4.00 [1.00, 5.00]	3.00 [1.00, 5.00]	3.00 [1.00, 5.00]	5.00 [4.00, 5.00]
	missing	0 (0%)	0 (0%)	0 (0%)	8 (26.7%)	0 (0%)	0 (0%)	0 (0%)	0 (0%)	2 (13.3%)
Abnormalities on the first CT scan	absent	108 (44.8%)	15 (27.8%)	64 (37.2%)	10 (33.3%)	6 (8.8%)	27 (19.6%)	3 (9.4%)	63 (30.0%)	2 (13.3%)
	present	125 (51.9%)	21 (38.9%)	71 (41.3%)	16 (53.3%)	31 (45.6%)	75 (54.3%)	8 (25.0%)	129 (61.4%)	13 (86.7%)
	missing	8 (3.3%)	18 (33.3%)	37 (21.5%)	4 (13.3%)	31 (45.6%)	36 (26.1%)	21 (65.6%)	18 (8.6%)	0 (0%)
Note. ER = emergency room, ADM = admission to a ward, ICU = intensive care unit, LOC = lost of conciousness, PTA = post-traumatic amnesia, GCS = Glasgow Coma Scale, GOSE = Glasgow Outcome Scale - Extended, Brain Injury AIS = Brain Injury Abbreviated Injury Scale, CT = computed tomography, M = mean, SD = standard deviation, Mdn = median, Min = minimum, Max = maximum.
