# Supplementary material for: Psychometric Characteristics of the Patient-Reported Outcome Measures Applied in the CENTER-TBI Study
Source: J Clin Med. 2021 May 28;10(11):2396. doi: 10.3390/jcm10112396 (PMC8199160; doi:10.3390/jcm10112396)
Supplement: Supplementary file 1 [file jcm-10-02396-s001.zip › OS_2_Reliability.xlsx]

## Sheet: Table 1. GAD-7
		Item level					Total score
Language	Item	NA (%)	M	SD	SK	KU	Item - total correlation	Cronbach's alpha	Cronbach's alpha if item omitted	Split-half reliability	N
Dutch	Feeling nervous, anxious or on edge	0	0.472603	0.74957	1.71552	2.64263	0.784982	0.923074	0.909046	0.933102	584
	Not being able to stop or control worrying	0.00171233	0.48542	0.83071	1.80559	2.50055	0.842812		0.902541
	Worrying too much about different things	0	0.640411	0.863284	1.35168	1.12393	0.85602		0.900998
	Having trouble relaxing	0	0.535959	0.831668	1.62743	1.9813	0.792334		0.907952
	Being so restless that it is hard to sit still	0.00171233	0.372213	0.734788	2.22257	4.58614	0.698884		0.917161
	Becoming easily annoyed or irritable	0.00171233	0.572899	0.827628	1.49232	1.62061	0.721286		0.915375
	Feeling afraid, as if something awful might happen	0.00684932	0.341379	0.703319	2.29754	4.98203	0.618753		0.924182
English	Feeling nervous, anxious or on edge	0	0.579439	0.811159	1.42485	1.49384	0.760219	0.90201	0.881889	0.914194	214
	Not being able to stop or control worrying	0.0046729	0.530516	0.821445	1.4528	1.21288	0.812111		0.875789
	Worrying too much about different things	0	0.565421	0.846379	1.41421	1.11077	0.778612		0.879474
	Having trouble relaxing	0	0.570093	0.867917	1.41475	1.01172	0.722216		0.886208
	Being so restless that it is hard to sit still	0.0046729	0.342723	0.707044	2.11802	3.81499	0.619689		0.8972
	Becoming easily annoyed or irritable	0	0.616822	0.92584	1.3538	0.694679	0.626039		0.898883
	Feeling afraid, as if something awful might happen	0	0.35514	0.778253	2.26983	4.25699	0.673322		0.891586
Finnish	Feeling nervous, anxious or on edge	0	0.47343	0.729423	1.62276	2.38115	0.786204	0.85625	0.809315	0.894308	207
	Not being able to stop or control worrying	0	0.309179	0.616176	2.17519	4.80774	0.700472		0.825049
	Worrying too much about different things	0	0.21256	0.465548	2.08467	3.62855	0.601398		0.84224
	Having trouble relaxing	0	0.458937	0.728747	1.60232	2.10286	0.611038		0.838887
	Being so restless that it is hard to sit still	0	0.231884	0.594757	2.77215	7.4979	0.654024		0.831972
	Becoming easily annoyed or irritable	0	0.429952	0.771879	1.87233	2.8691	0.596698		0.842965
	Feeling afraid, as if something awful might happen	0.00483092	0.208738	0.513355	2.84531	9.18158	0.451455		0.857157
French	Feeling nervous, anxious or on edge	0	0.798165	0.960129	0.965844	-0.163813	0.854703	0.937894	0.922947	0.948311	109
	Not being able to stop or control worrying	0	0.688073	0.978446	1.1759	0.107152	0.878143		0.920631
	Worrying too much about different things	0	0.706422	1.01199	1.1877	0.0750928	0.887761		0.919521
	Having trouble relaxing	0	0.761468	1.0878	1.16125	-0.133671	0.854545		0.923065
	Being so restless that it is hard to sit still	0	0.422018	0.853029	2.01472	2.96839	0.660933		0.93963
	Becoming easily annoyed or irritable	0	0.816514	0.954183	0.93776	-0.175729	0.721491		0.934975
	Feeling afraid, as if something awful might happen	0.0183486	0.476636	0.904348	1.81267	2.05539	0.722438		0.934736
German	Feeling nervous, anxious or on edge	0	0.525641	0.715766	1.37973	1.81963	0.675672	0.836654	0.799711	0.850484	78
	Not being able to stop or control worrying	0	0.384615	0.668994	1.96107	4.12038	0.720104		0.793513
	Worrying too much about different things	0	0.5	0.785419	1.58764	1.9482	0.750833		0.785226
	Having trouble relaxing	0	0.461538	0.696789	1.38581	1.30582	0.58696		0.814451
	Being so restless that it is hard to sit still	0	0.269231	0.550633	1.89073	2.56753	0.441814		0.834427
	Becoming easily annoyed or irritable	0	0.448718	0.657572	1.13323	0.0516627	0.360846		0.847224
	Feeling afraid, as if something awful might happen	0	0.320513	0.693075	2.49798	6.23543	0.578458		0.815791
Italian	Feeling nervous, anxious or on edge	0.0037594	0.777358	0.839065	1.12473	0.927453	0.796738	0.923183	0.907753	0.949799	266
	Not being able to stop or control worrying	0	0.639098	0.880295	1.36036	1.05268	0.810896		0.906135
	Worrying too much about different things	0	0.695489	0.895133	1.19761	0.577068	0.834168		0.903614
	Having trouble relaxing	0	0.725564	0.921373	1.14253	0.353039	0.80811		0.906506
	Being so restless that it is hard to sit still	0	0.368421	0.72657	2.07864	3.75347	0.698286		0.917672
	Becoming easily annoyed or irritable	0	0.672932	0.869928	1.26247	0.876024	0.723707		0.915145
	Feeling afraid, as if something awful might happen	0	0.43609	0.794827	1.89357	2.84174	0.648083		0.921935
Norwegian	Feeling nervous, anxious or on edge	0	0.525692	0.72671	1.30142	1.21337	0.732568	0.899455	0.881342	0.925265	253
	Not being able to stop or control worrying	0	0.422925	0.739334	1.84939	2.96865	0.794318		0.873823
	Worrying too much about different things	0	0.557312	0.787852	1.38763	1.35357	0.784791		0.874895
	Having trouble relaxing	0	0.478261	0.75889	1.67391	2.39235	0.820493		0.870361
	Being so restless that it is hard to sit still	0	0.383399	0.660117	1.79234	3.00839	0.583481		0.897535
	Becoming easily annoyed or irritable	0	0.494071	0.710581	1.40887	1.63269	0.563463		0.900395
	Feeling afraid, as if something awful might happen	0	0.221344	0.596301	3.01539	9.12464	0.663962		0.889889
Spanish	Feeling nervous, anxious or on edge	0	0.786561	0.878478	0.985225	0.242653	0.693324	0.890052	0.87301	0.927522	253
	Not being able to stop or control worrying	0	0.786561	0.9646	1.01553	-0.0677575	0.717188		0.870134
	Worrying too much about different things	0.00790514	0.932271	0.963013	0.750276	-0.460671	0.667328		0.876666
	Having trouble relaxing	0.00395257	0.694444	0.868832	1.06411	0.228616	0.789254		0.861514
	Being so restless that it is hard to sit still	0	0.490119	0.819469	1.69073	2.0663	0.667547		0.876286
	Becoming easily annoyed or irritable	0	0.719368	0.932387	1.10707	0.162843	0.68178		0.874518
	Feeling afraid, as if something awful might happen	0.00790514	0.434263	0.799163	1.92363	2.95177	0.588565		0.884854
Swedish	Feeling nervous, anxious or on edge	0	0.483333	0.596364	1.24153	2.76718	0.507637	0.862794	0.859167	0.828444	60
	Not being able to stop or control worrying	0	0.383333	0.640224	1.76622	3.3233	0.70979		0.83325
	Worrying too much about different things	0	0.4	0.741048	1.93636	3.28448	0.748747		0.825805
	Having trouble relaxing	0	0.533333	0.724081	1.46653	2.2804	0.714203		0.831324
	Being so restless that it is hard to sit still	0	0.233333	0.563484	2.80623	8.8346	0.573169		0.851742
	Becoming easily annoyed or irritable	0	0.533333	0.700282	1.19411	1.10807	0.501142		0.86199
	Feeling afraid, as if something awful might happen	0.0166667	0.355932	0.737253	2.14342	3.99564	0.684532		0.835928
Total	M	0.00134445	0.508721	0.778932	1.64456	2.39803	0.696993	0.892374	0.876268	0.907937	224.889
	Max	0.0183486	0.932271	1.0878	3.01539	9.18158	0.887761	0.937894	0.93963	0.949799	584
	Min	0	0.208738	0.465548	0.750276	-0.460671	0.360846	0.836654	0.785226	0.828444	60
	SD	0.00354244	0.16878	0.127651	0.506824	2.21687	0.111495	0.0325716	0.0387484	0.0405231	148.327
Note. N = number of observations; NA = missing data; M = mean; SD = standard deviation; for skewness (SK), values less than -1 or greater than 1 indicate highly skewed distribution; values from ±1 to ±0.5 show that the distribution is moderately skewed; values from -0.5 and 0.5 indicate a symmetrical distribution. For asymmetry and kurtosis (KU), the values from -2 and +2 are considered acceptabl…

## Sheet: Table 2. PHQ-9
		Item level					Total score
Language	Item	NA (%)	M	SD	SK	KU	Item - total correlation	Cronbach's alpha	Cronbach's alpha if item omitted	Split-half reliability	N
Dutch	Little interest or pleasure in doing things	0.00340716	0.504274	0.823706	1.70227	2.18372	0.721678	0.877779	0.855422	0.904758	587
	Feeling down, depressed, or hopeless	0.00170358	0.411263	0.718362	1.91395	3.4203	0.743916		0.855384
	Trouble falling or staying asleep, or sleeping too much	0	0.848382	1.03974	0.932391	-0.433919	0.608149		0.868502
	Feeling tired or having little energy	0	1.04089	0.999162	0.666414	-0.620119	0.683954		0.859375
	Poor appetite or overeating	0.00170358	0.453925	0.846568	1.87396	2.49886	0.674448		0.859584
	Feeling bad about yourself	0.00170358	0.319113	0.700825	2.35432	5.00206	0.630429		0.86444
	Trouble concentrating on things	0	0.654174	0.928132	1.3104	0.661936	0.568922		0.870175
	Moving or speaking so slowly	0	0.25724	0.661156	2.88435	8.01268	0.487735		0.87489
	Thoughts that you would be better off dead or of hurting yourself	0.00340716	0.150427	0.508089	4.06574	17.7126	0.577946		0.87127
English	Little interest or pleasure in doing things	0	0.509346	0.815004	1.67919	2.19002	0.747845	0.875899	0.851355	0.897623	214
	Feeling down, depressed, or hopeless	0	0.584112	0.793122	1.26972	0.956926	0.758756		0.850864
	Trouble falling or staying asleep, or sleeping too much	0	0.929907	1.0919	0.784218	-0.801502	0.511623		0.876558
	Feeling tired or having little energy	0	1.1028	1.04755	0.600319	-0.840799	0.674316		0.857849
	Poor appetite or overeating	0	0.542056	0.906734	1.54913	1.22344	0.629692		0.861306
	Feeling bad about yourself	0	0.523364	0.907411	1.67585	1.66448	0.626616		0.861596
	Trouble concentrating on things	0	0.560748	0.868624	1.39687	0.876073	0.590874		0.864731
	Moving or speaking so slowly	0	0.294393	0.63709	2.26225	4.68751	0.56988		0.867672
	Thoughts that you would be better off dead or of hurting yourself	0	0.214953	0.548631	2.95795	9.47632	0.571384		0.869124
Finnish	Little interest or pleasure in doing things	0	0.461165	0.756079	1.64725	2.10404	0.631174	0.863661	0.845763	0.922035	206
	Feeling down, depressed, or hopeless	0	0.466019	0.743302	1.64074	2.2472	0.668717		0.842514
	Trouble falling or staying asleep, or sleeping too much	0	0.912621	1.05559	0.866753	-0.541074	0.573928		0.85554
	Feeling tired or having little energy	0	0.927184	1.00707	0.772326	-0.575533	0.77177		0.829595
	Poor appetite or overeating	0	0.378641	0.740685	2.06747	3.69184	0.504812		0.856985
	Feeling bad about yourself	0.00485437	0.429268	0.7417	1.85619	3.06656	0.653662		0.843895
	Trouble concentrating on things	0	0.432039	0.833882	2.02286	3.19045	0.630567		0.845429
	Moving or speaking so slowly	0	0.276699	0.688683	2.70379	6.79251	0.52609		0.855199
	Thoughts that you would be better off dead or of hurting yourself	0	0.15534	0.458146	3.59294	15.227	0.44057		0.862966
French	Little interest or pleasure in doing things	0	0.915888	1.0472	0.849589	-0.550606	0.655716	0.874282	0.856803	0.913596	107
	Feeling down, depressed, or hopeless	0	0.738318	1.0218	1.16336	0.0437859	0.765968		0.845912
	Trouble falling or staying asleep, or sleeping too much	0	1.04673	1.06738	0.553791	-1.02756	0.459987		0.876013
	Feeling tired or having little energy	0	1.16822	1.02318	0.396857	-1.01775	0.674979		0.854889
	Poor appetite or overeating	0	0.841121	1.02928	0.882384	-0.540669	0.497755		0.871763
	Feeling bad about yourself	0.00934579	0.698113	0.957873	1.13962	0.100135	0.711063		0.851822
	Trouble concentrating on things	0	0.654206	0.962532	1.29222	0.457657	0.645456		0.857785
	Moving or speaking so slowly	0	0.439252	0.826193	1.8326	2.35461	0.586273		0.863408
	Thoughts that you would be better off dead or of hurting yourself	0.00934579	0.235849	0.61026	2.82024	7.85088	0.601303		0.86557
German	Little interest or pleasure in doing things	0	0.604938	0.903867	1.44542	1.13301	0.720515	0.850209	0.817043	0.896211	81
	Feeling down, depressed, or hopeless	0	0.432099	0.789593	1.95139	3.21939	0.701221		0.820754
	Trouble falling or staying asleep, or sleeping too much	0	0.851852	0.988826	0.906962	-0.317262	0.641383		0.827471
	Feeling tired or having little energy	0	0.888889	1.0247	0.907755	-0.380522	0.808191		0.804779
	Poor appetite or overeating	0	0.419753	0.756046	2.06901	4.08626	0.404807		0.850183
	Feeling bad about yourself	0	0.209877	0.49285	2.27045	4.37055	0.501393		0.843542
	Trouble concentrating on things	0	0.604938	0.831851	1.3427	1.15408	0.629404		0.82802
	Moving or speaking so slowly	0	0.358025	0.763358	2.3095	4.73147	0.337445		0.856537
	Thoughts that you would be better off dead or of hurting yourself	0	0.123457	0.366835	2.96621	8.68518	0.456628		0.848966
Italian	Little interest or pleasure in doing things	0	0.769811	0.876802	1.09942	0.579045	0.740026	0.88577	0.864356	0.906402	265
	Feeling down, depressed, or hopeless	0	0.70566	0.818909	1.12065	0.809462	0.749973		0.864251
	Trouble falling or staying asleep, or sleeping too much	0	0.841509	1.07193	0.996607	-0.386651	0.544836		0.88453
	Feeling tired or having little energy	0	1.06038	0.955514	0.710615	-0.369623	0.703861		0.867328
	Poor appetite or overeating	0	0.584906	0.90942	1.50941	1.24764	0.613408		0.875339
	Feeling bad about yourself	0.00377358	0.488636	0.813306	1.72632	2.27667	0.647945		0.872468
	Trouble concentrating on things	0.00377358	0.67803	0.90967	1.24807	0.618982	0.632756		0.87365
	Moving or speaking so slowly	0	0.366038	0.742371	2.23422	4.51184	0.54437		0.880395
	Thoughts that you would be better off dead or of hurting yourself	0.00377358	0.227273	0.617747	3.18906	10.3634	0.62878		0.876275
Norwegian	Little interest or pleasure in doing things	0	0.562992	0.791487	1.46089	1.71247	0.741253	0.890552	0.870651	0.911328	254
	Feeling down, depressed, or hopeless	0	0.543307	0.777712	1.43832	1.57795	0.799747		0.865942
	Trouble falling or staying asleep, or sleeping too much	0	0.854331	0.973178	0.933327	-0.183412	0.590782		0.885961
	Feeling tired or having little energy	0	1.01181	0.926049	0.660895	-0.395463	0.663918		0.877899
	Poor appetite or overeating	0	0.511811	0.813582	1.58509	1.75796	0.623421		0.880447
	Feeling bad about yourself	0	0.464567	0.757521	1.66824	2.23539	0.734303		0.871599
	Trouble concentrating on things	0	0.519685	0.808555	1.47827	1.33732	0.677107		0.875945
	Moving or speaking so slowly	0	0.299213	0.663146	2.42092	5.58231	0.53764		0.886572
	Thoughts that you would be better off dead or of hurting yourself	0	0.15748	0.452052	3.43433	13.9126	0.528719		0.88918
Spanish	Little interest or pleasure in doing things	0	0.70751	0.951931	1.2129	0.391696	0.714065	0.879375	0.857918	0.912076	253
	Feeling down, depressed, or hopeless	0	0.735178	0.932774	1.0417	-0.00265095	0.752609		0.854444
	Trouble falling or staying asleep, or sleeping too much	0.00395257	0.845238	1.02744	0.925485	-0.416962	0.541744		0.874895
	Feeling tired or having little energy	0	0.996047	1.03317	0.760476	-0.598395	0.714373		0.857807
	Poor appetite or overeating	0	0.683794	0.965072	1.26929	0.452766	0.477018		0.87971
	Feeling bad about yourself	0	0.438735	0.797567	1.81248	2.4136	0.644242		0.865097
	Trouble concentrating on things	0	0.592885	0.888791	1.42543	1.05641	0.702035		0.859449
	Moving or speaking so slowly	0	0.422925	0.849246	1.98286	2.80592	0.605147		0.867852
	Thoughts that you would be better off dead or of hurting yourself	0	0.205534	0.581842	3.31492	11.4194	0.50861		0.876444
Swedish	Little interest or pleasure in doing things	0	0.55	0.852215	1.62415	1.96218	0.472245	0.778799	0.756981	0.854355	60
	Feeling down, depressed, or hopeless	0	0.533333	0.700282	1.19411	1.10807	0.59499		0.739549
	Trouble falling or staying asleep, or sleeping too much	0	0.816667	0.911167	0.888123	-0.131891	0.611906		0.732641
	Feeling tired or having little energy	0	0.916667	0.888565	0.72886	-0.238656	0.490834		0.754416
	Poor appetite or overeating	0.0166667	0.508475	0.838161	1.44181	0.948491	0.648933		0.726904
	Feeling bad about yourself	0	0.3	0.645716	2.24343	4.74073	0.406951		0.765316
	Trouble concentrating on things	0	0.383333	0.640224	1.76622	3.3233	0.379194		0.768685
	Moving or speaking so slowly	0.0166667	0.220339	0.645082	3.18318	9.86096	0.181188		0.791924
	Thoughts that you would be better off dead or of hurting yourself	0.0166667	0.186441	0.472505	2.47025	5.4199	0.380294		0.7702
Total	M	0.00124376	0.571141	0.822609	1.65864	2.7053	0.606274	0.864036	0.849164	0.902043	225.222
	Max	0.0166667	1.16822	1.0919	4.06574	17.7126	0.808191	0.890552	0.88918	0.922035	587
	Min	0	0.123457	0.366835	0.396857	-1.02756	0.181188	0.778799	0.726904	0.854355	60
	SD	0.00352943	0.264745	0.168318	0.795822	3.84813	0.116318	0.0323493	0.0370945	0.0185968	148.733
Note. N = number of observations; NA = missing data; M = mean; SD = standard deviation; for skewness (SK), values less than -1 or greater than 1 indicate highly skewed distribution; values from ±1 to ±0.5 show that the distribution is moderately skewed; values from -0.5 and 0.5 indicate a symmetrical distribution. For asymmetry and kurtosis (KU), the values from -2 and +2 are considered acceptabl…

## Sheet: Table 3. PCL-5
			Item level					Cluster level				Total score
Language	DSM-5 Cluster	Item	NA (%)	M	SD	SK	KU	Item - total correlation	Cronbach's alpha	Cronbach's alpha if item omitted	Split-half reliability	Item - total correlation	Cronbach's alpha	Cronbach's alpha if item omitted	Split-half reliability	N
Dutch	B	Unwanted memories of the stressful experience	0	0.614334	0.989552	1.81111	2.7347	0.738881	0.902349	0.89319	0.920996	0.687467	0.934559	0.930114	0.95616	586
		Disturbing dreams of the stressful experience	0.00341297	0.275685	0.729922	3.09038	9.74016	0.75626		0.8818		0.649739		0.931342
		Feeling or acting as if the stressful experience were actually happening again	0	0.351536	0.777442	2.61348	6.89806	0.764206		0.879256		0.692409		0.93054
		Feeling very upset	0.00341297	0.335616	0.775061	2.6307	6.75415	0.808812		0.869873		0.768102		0.929403
		Having strong physical reactions	0	0.276451	0.710381	3.05979	9.5872	0.762096		0.881281		0.69342		0.930815
	C	Avoiding memories, thoughts, or feelings	0	0.424915	0.880167	2.32333	4.97038	0.660239	0.794932	0.660239	-	0.652848		0.930888
		Avoiding external reminders	0	0.421502	0.917903	2.38275	5.0397	0.660239		0.660239		0.661208		0.930684
	D	Trouble remembering important parts	0.00341297	0.797945	1.28866	1.52163	0.970655	0.42996	0.848055	0.865372	0.865799	0.492615		0.935298
		Having strong negative beliefs about yourself, other people, or the world	0	0.383959	0.86391	2.52731	6.01143	0.692868		0.816756		0.667797		0.930668
		Blaming yourself or someone else	0.00341297	0.409247	0.902816	2.38644	4.97016	0.466971		0.845891		0.513379		0.933273
		Having strong negative feelings	0	0.431741	0.894207	2.38181	5.26864	0.716546		0.812652		0.735097		0.92943
		Loss of interest in activities	0	0.699659	1.10255	1.55158	1.43713	0.640963		0.821984		0.673649		0.9304
		Feeling distant or cut off	0.00170648	0.478632	0.934483	2.17344	4.15933	0.714177		0.811886		0.665682		0.930581
		Trouble experiencing positive feelings	0	0.433447	0.907617	2.40941	5.44405	0.708232		0.813431		0.690371		0.930183
	E	Irritable behaviour, angry outbursts, or acting aggressively	0	0.55802	0.963015	1.882	2.8573	0.58475	0.794611	0.75602	0.844003	0.641358		0.931006
		Taking too many risks or doing things that could cause you harm	0	0.180887	0.585911	3.96676	17.4699	0.428759		0.793344		0.47387		0.933961
		Being “super alert” or watchful or on guard	0	0.959044	1.20186	1.1637	0.35607	0.496362		0.778197		0.545505		0.933535
		Feeling jumpy or easily startled	0.00170648	0.601709	0.965322	1.74109	2.55925	0.67769		0.735528		0.70976		0.929719
		Having difficulty concentrating	0	1.09727	1.22192	0.981725	-0.0506195	0.625573		0.743683		0.651644		0.931146
		Trouble falling or staying asleep	0	1.01877	1.29218	1.04717	-0.17248	0.559022		0.764454		0.550803		0.933905
English	B	Unwanted memories of the stressful experience	0	0.704225	1.09967	1.44746	1.00625	0.707742	0.889512	0.873115	0.914271	0.710563	0.937292	0.932812	0.947305	213
English		Disturbing dreams of the stressful experience	0	0.394366	0.963664	2.4553	5.02914	0.75281		0.86077		0.701619		0.933243
English		Feeling or acting as if the stressful experience were actually happening again	0.00469484	0.287736	0.812952	3.22714	10.2101	0.797361		0.856899		0.714175		0.933587
English		Feeling very upset	0	0.690141	1.10648	1.62753	1.70637	0.656484		0.886115		0.680681		0.93334
English		Having strong physical reactions	0	0.42723	0.931934	2.29933	4.59871	0.793587		0.852392		0.762036		0.932415
English	C	Avoiding memories, thoughts, or feelings	0	0.57277	1.07309	1.86359	2.37739	0.708449	0.829197	0.708449	-	0.69677		0.933095
English		Avoiding external reminders	0	0.568075	1.0467	1.85921	2.43369	0.708449		0.708449		0.685948		0.933322
English	D	Trouble remembering important parts	0.00469484	1.25943	1.59194	0.758939	-1.10919	0.379445	0.835071	0.860865	0.869755	0.353675		0.94229
English		Having strong negative beliefs about yourself, other people, or the world	0	0.568075	0.971924	1.77266	2.40514	0.66459		0.804473		0.727986		0.932804
English		Blaming yourself or someone else	0	0.737089	1.20392	1.5611	1.23653	0.567546		0.815348		0.596897		0.934929
English		Having strong negative feelings	0	0.638498	1.10991	1.60796	1.42306	0.654909		0.80258		0.677304		0.933398
English		Loss of interest in activities	0	0.868545	1.23685	1.26141	0.341374	0.598929		0.810358		0.650335		0.933919
English		Feeling distant or cut off	0.00469484	0.792453	1.166	1.38812	0.850208	0.70832		0.793215		0.712547		0.9327
English		Trouble experiencing positive feelings	0	0.610329	1.00155	1.64587	1.73733	0.675804		0.802121		0.686444		0.933396
English	E	Irritable behaviour, angry outbursts, or acting aggressively	0	0.765258	1.13325	1.35643	0.655403	0.556439	0.810211	0.783506	0.847466	0.591147		0.934956
English		Taking too many risks or doing things that could cause you harm	0	0.338028	0.788065	2.55408	6.23809	0.467564		0.803249		0.452935		0.93698
English		Being “super alert” or watchful or on guard	0	0.746479	1.17423	1.55945	1.34075	0.639166		0.764426		0.665373		0.933594
English		Feeling jumpy or easily startled	0	0.57277	1.06868	1.89995	2.618	0.668583		0.759822		0.685489		0.933298
English		Having difficulty concentrating	0	1.01878	1.21687	1.02737	-0.0287361	0.65064		0.761347		0.672602		0.933463
English		Trouble falling or staying asleep	0	1.05164	1.35708	0.977713	-0.473496	0.486883		0.805868		0.547465		0.936342
Finnish	B	Unwanted memories of the stressful experience	0	0.584906	0.922267	1.48315	1.23598	0.67961	0.811683	0.763108	0.863487	0.597717	0.917892	0.913359	0.936915	212
Finish		Disturbing dreams of the stressful experience	0	0.259434	0.662936	2.86768	8.5462	0.673874		0.753046		0.556584		0.914708
Finish		Feeling or acting as if the stressful experience were actually happening again	0	0.207547	0.537097	2.86802	8.54441	0.655183		0.767844		0.563213		0.915209
Finish		Feeling very upset	0	0.330189	0.65631	2.34161	6.42365	0.551122		0.789138		0.602838		0.913976
Finish		Having strong physical reactions	0	0.20283	0.577124	3.20153	10.4124	0.523828		0.797044		0.597148		0.914501
Finish	C	Avoiding memories, thoughts, or feelings	0	0.325472	0.703891	2.45639	6.25659	0.650982	0.784472	0.650982	-	0.652629		0.912876
Finish		Avoiding external reminders	0	0.382075	0.802992	2.48919	6.36834	0.650982		0.650982		0.608248		0.913313
Finish	D	Trouble remembering important parts	0	1.33019	1.5712	0.717986	-1.08901	0.325827	0.78913	0.838404	0.828971	0.361427		0.926031
Finish		Having strong negative beliefs about yourself, other people, or the world	0	0.433962	0.826331	2.06578	3.96803	0.591276		0.752696		0.649504		0.912394
Finish		Blaming yourself or someone else	0	0.580189	1.01093	1.72703	2.01125	0.388551		0.785856		0.39863		0.918376
Finish		Having strong negative feelings	0	0.372642	0.740057	2.22096	4.9283	0.660638		0.74653		0.672713		0.912313
Finish		Loss of interest in activities	0	0.641509	1.02748	1.5365	1.49215	0.629441		0.739722		0.688873		0.911045
Finish		Feeling distant or cut off	0.00471698	0.545024	0.956985	1.7541	2.23491	0.763149		0.715809		0.752499		0.909582
Finish		Trouble experiencing positive feelings	0	0.349057	0.735588	2.33976	5.40575	0.583044		0.757695		0.600852		0.913669
Finish	E	Irritable behaviour, angry outbursts, or acting aggressively	0	0.575472	0.928211	1.7444	2.6602	0.636328	0.828415	0.79344	0.838824	0.639722		0.912373
Finish		Taking too many risks or doing things that could cause you harm	0	0.287736	0.665494	2.38917	5.06366	0.569085		0.812754		0.57325		0.914423
Finish		Being “super alert” or watchful or on guard	0	0.457547	0.844884	2.12696	4.46865	0.580546		0.805471		0.626781		0.912821
Finish		Feeling jumpy or easily startled	0	0.448113	0.838723	2.08172	4.02416	0.679445		0.787872		0.668632		0.911947
Finish		Having difficulty concentrating	0	0.891509	1.16119	1.1866	0.439767	0.681655		0.783261		0.730019		0.909886
Finish		Trouble falling or staying asleep	0.00471698	1.00948	1.27985	1.08111	-0.0294883	0.559219		0.821212		0.558379		0.915672
French	B	Unwanted memories of the stressful experience	0	0.627273	1.08246	1.63067	1.53976	0.661928	0.889683	0.883331	0.91116	0.587458	0.934815	0.932277	0.938434	110
French		Disturbing dreams of the stressful experience	0	0.363636	0.905916	2.67937	6.56139	0.725486		0.86812		0.568472		0.932733
French		Feeling or acting as if the stressful experience were actually happening again	0	0.363636	0.809658	2.44517	5.62537	0.790937		0.859261		0.647503		0.931916
French		Feeling very upset	0	0.736364	1.14681	1.42485	0.868133	0.753924		0.862684		0.711168		0.930027
French		Having strong physical reactions	0	0.545455	1.03725	1.81046	2.07349	0.775529		0.855381		0.715427		0.930195
French	C	Avoiding memories, thoughts, or feelings	0	0.609091	1.00545	1.52758	1.18499	0.851306	0.919464	0.851306	-	0.733057		0.930003
French		Avoiding external reminders	0	0.572727	1.03569	1.5503	1.02213	0.851306		0.851306		0.66038		0.931107
French	D	Trouble remembering important parts	0	1.78182	1.65558	0.17769	-1.65463	0.173305	0.83241	0.891162	0.839427	0.204119		0.943183
French		Having strong negative beliefs about yourself, other people, or the world	0	0.863636	1.28846	1.27206	0.29204	0.689213		0.791821		0.671768		0.930697
French		Blaming yourself or someone else	0	0.890909	1.26597	1.2784	0.397787	0.65944		0.797031		0.625273		0.931626
French		Having strong negative feelings	0	0.881818	1.26876	1.07445	-0.262237	0.757588		0.780695		0.790797		0.928265
French		Loss of interest in activities	0	0.981818	1.24135	0.946523	-0.373063	0.591643		0.808014		0.641424		0.931291
French		Feeling distant or cut off	0.0272727	0.766355	1.13752	1.37469	0.818541	0.730554		0.788725		0.730961		0.929683
French		Trouble experiencing positive feelings	0	0.627273	1.03922	1.65503	1.87439	0.687184		0.79791		0.667794		0.930978
French	E	Irritable behaviour, angry outbursts, or acting aggressively	0	1.00909	1.25979	0.910655	-0.49653	0.643919	0.848539	0.821043	0.850695	0.606673		0.931991
French		Taking too many risks or doing things that could cause you harm	0.00909091	0.550459	1.00449	1.84534	2.41579	0.636197		0.825287		0.741008		0.929879
French		Being “super alert” or watchful or on guard	0	0.818182	1.11027	0.996029	-0.389846	0.677651		0.816088		0.621603		0.931675
French		Feeling jumpy or easily startled	0.00909091	0.862385	1.23579	1.22197	0.251492	0.771955		0.795444		0.747874		0.929187
French		Having difficulty concentrating	0.0181818	1.32407	1.33135	0.505904	-1.09861	0.604724		0.829676		0.652958		0.931117
French		Trouble falling or staying asleep	0	1.18182	1.3558	0.744311	-0.859117	0.499619		0.851661		0.53202		0.933722
German	B	Unwanted memories of the stressful experience	0	0.539474	0.870874	1.49429	1.19473	0.752729	0.884706	0.854213	0.912979	0.642562	0.916625	0.910946	0.934884	76
German		Disturbing dreams of the stressful experience	0	0.289474	0.669642	2.23256	4.03842	0.741405		0.857907		0.639445		0.911813
German		Feeling or acting as if the stressful experience were actually happening again	0	0.394737	0.784499	2.30734	5.73061	0.718886		0.860622		0.644548		0.911166
German		Feeling very upset	0	0.5	0.87178	1.60861	1.45924	0.880433		0.818982		0.806607		0.907136
German		Having strong physical reactions	0	0.223684	0.602189	2.76558	7.16375	0.550583		0.895062		0.529433		0.913953
German	C	Avoiding memories, thoughts, or feelings	0	0.368421	0.649966	1.49414	0.896182	0.635054	0.766966	0.635054	-	0.600434		0.91259
German		Avoiding external reminders	0	0.368421	0.797364	2.37475	5.68873	0.635054		0.635054		0.623974		0.911548
German	D	Trouble remembering important parts	0.0263158	1.36486	1.5041	0.614111	-1.14094	0.317433	0.778836	0.835323	0.85884	0.3689		0.923899
German		Having strong negative beliefs about yourself, other people, or the world	0	0.276316	0.665306	2.31795	4.38816	0.708427		0.726934		0.71459		0.910527
German		Blaming yourself or someone else	0	0.565789	1.02418	1.73552	2.11128	0.383478		0.776663		0.421375		0.916676
German		Having strong negative feelings	0	0.328947	0.680944	2.24934	4.86469	0.63336		0.736796		0.755573		0.909669
German		Loss of interest in activities	0	0.473684	0.916132	2.02733	3.40613	0.620651		0.727509		0.615695		0.911511
German		Feeling distant or cut off	0	0.355263	0.706238	1.85735	2.43731	0.681809		0.7277		0.627658		0.911833
German		Trouble experiencing positive feelings	0	0.368421	0.797364	2.06329	3.1395	0.605717		0.734842		0.690441		0.910154
German	E	Irritable behaviour, angry outbursts, or acting aggressively	0	0.5	0.840635	1.66121	1.89425	0.461788	0.737665	0.705018	0.775363	0.443542		0.915353
German		Taking too many risks or doing things that could cause you harm	0	0.434211	0.928591	2.11221	3.51047	0.403651		0.71982		0.456447		0.915329
German		Being “super alert” or watchful or on guard	0	0.486842	0.84053	1.5697	1.36084	0.475959		0.701503		0.53717		0.913332
German		Feeling jumpy or easily startled	0	0.421053	0.735086	1.56143	1.37651	0.617938		0.673574		0.685146		0.910594
German		Having difficulty concentrating	0	0.868421	1.12359	0.97907	-0.146059	0.547999		0.678269		0.688205		0.909643
German		Trouble falling or staying asleep	0	0.907895	1.19083	1.29693	0.735543	0.419911		0.725988		0.53744		0.914483
Italian	B	Unwanted memories of the stressful experience	0	0.877395	1.15372	1.12216	0.21634	0.793699	0.900036	0.86877	0.918911	0.736597	0.938649	0.933791	0.952394	261
Italian		Disturbing dreams of the stressful experience	0	0.509579	0.926586	1.86487	2.80254	0.730424		0.884317		0.63516		0.935821
Italian		Feeling or acting as if the stressful experience were actually happening again	0	0.563218	0.996546	1.69602	1.94279	0.701744		0.888668		0.674018		0.935102
Italian		Feeling very upset	0	0.842912	1.17434	1.22782	0.388238	0.830053		0.860123		0.786025		0.932828
Italian		Having strong physical reactions	0	0.689655	1.11607	1.52222	1.22033	0.719357		0.885443		0.699327		0.934512
Italian	C	Avoiding memories, thoughts, or feelings	0	0.681992	1.05358	1.48321	1.30703	0.816523	0.898839	0.816523	-	0.707162		0.934459
Italian		Avoiding external reminders	0	0.636015	1.02736	1.55202	1.43597	0.816523		0.816523		0.716529		0.934353
Italian	D	Trouble remembering important parts	0	1.32567	1.51571	0.695828	-1.07038	0.416922	0.826506	0.841761	0.847085	0.4424		0.941063
Italian		Having strong negative beliefs about yourself, other people, or the world	0	0.59387	1.00183	1.6287	1.75068	0.636527		0.7949		0.638944		0.935653
Italian		Blaming yourself or someone else	0	0.636015	1.04223	1.5161	1.15691	0.479082		0.817117		0.534653		0.937333
Italian		Having strong negative feelings	0	0.758621	1.14656	1.43922	1.05121	0.667356		0.787188		0.747526		0.933597
Italian		Loss of interest in activities	0	0.812261	1.20224	1.35464	0.67266	0.60577		0.797282		0.622984		0.935934
Italian		Feeling distant or cut off	0	0.720307	1.07879	1.46669	1.30295	0.672516		0.787649		0.69054		0.934707
Italian		Trouble experiencing positive feelings	0	0.547893	1.02404	1.90496	2.76366	0.623315		0.796343		0.615297		0.936015
Italian	E	Irritable behaviour, angry outbursts, or acting aggressively	0	0.812261	1.07023	1.27666	0.85045	0.634575	0.827288	0.791901	0.849693	0.671044		0.935052
Italian		Taking too many risks or doing things that could cause you harm	0.00383142	0.573077	0.890992	1.55826	1.79003	0.538341		0.812226		0.478259		0.938088
Italian		Being “super alert” or watchful or on guard	0	0.819923	1.09639	1.28312	0.727687	0.589651		0.800944		0.596477		0.93633
Italian		Feeling jumpy or easily startled	0	0.659004	1.02779	1.45504	1.07989	0.728145		0.773907		0.735421		0.93404
Italian		Having difficulty concentrating	0	1.11111	1.2244	0.853131	-0.377282	0.578292		0.804745		0.622644		0.935969
Italian		Trouble falling or staying asleep	0	0.996169	1.28751	1.10575	-0.0435022	0.550974		0.812971		0.548728		0.937578
Norwegian	B	Unwanted memories of the stressful experience	0	0.459677	0.852709	1.93961	3.19949	0.777866	0.897539	0.869037	0.921079	0.725311	0.929232	0.923654	0.947207	248
Norwegian		Disturbing dreams of the stressful experience	0	0.258065	0.718421	2.8387	7.02805	0.756013		0.873656		0.689703		0.924854
Norwegian		Feeling or acting as if the stressful experience were actually happening again	0	0.205645	0.637912	3.7099	14.7415	0.764124		0.875276		0.729687		0.924761
Norwegian		Feeling very upset	0	0.451613	0.889478	1.98479	3.22792	0.743617		0.87935		0.727812		0.923474
Norwegian		Having strong physical reactions	0	0.254032	0.711377	3.08779	9.52454	0.735076		0.87809		0.678751		0.925057
Norwegian	C	Avoiding memories, thoughts, or feelings	0	0.455645	0.938411	2.2651	4.51504	0.690482	0.816701	0.690482	-	0.66356		0.924626
Norwegian		Avoiding external reminders	0	0.443548	0.911487	2.1794	4.05687	0.690482		0.690482		0.60653		0.925773
Norwegian	D	Trouble remembering important parts	0	1.81855	1.64801	0.176262	-1.60701	0.297845	0.792174	0.851634	0.831324	0.284383		0.940468
Norwegian		Having strong negative beliefs about yourself, other people, or the world	0	0.342742	0.752504	2.47169	6.16598	0.647376		0.753281		0.694898		0.924607
Norwegian		Blaming yourself or someone else	0.00403226	0.615385	1.08662	1.7488	2.0309	0.484235		0.772583		0.48061		0.928814
Norwegian		Having strong negative feelings	0	0.423387	0.905548	2.2965	4.70534	0.656763		0.74416		0.771403		0.922566
Norwegian		Loss of interest in activities	0	0.580645	0.994697	1.71973	2.118	0.594103		0.752348		0.685546		0.924112
Norwegian		Feeling distant or cut off	0	0.439516	0.884167	2.14297	4.11348	0.71112		0.73605		0.729423		0.923461
Norwegian		Trouble experiencing positive feelings	0	0.366935	0.83353	2.49157	5.75982	0.61205		0.754435		0.583507		0.926257
Norwegian	E	Irritable behaviour, angry outbursts, or acting aggressively	0	0.504032	0.829604	1.7669	2.86903	0.649352	0.820275	0.78029	0.863649	0.651913		0.925055
Norwegian		Taking too many risks or doing things that could cause you harm	0	0.258065	0.683773	3.10692	10.253	0.432966		0.820321		0.427643		0.928808
Norwegian		Being “super alert” or watchful or on guard	0	0.467742	0.833853	1.79173	2.4936	0.545165		0.800231		0.634534		0.925353
Norwegian		Feeling jumpy or easily startled	0	0.370968	0.85336	2.52511	5.93668	0.667385		0.775857		0.702417		0.924073
Norwegian		Having difficulty concentrating	0	0.766129	1.02289	1.13214	0.269133	0.686774		0.768103		0.700641		0.923762
Norwegian		Trouble falling or staying asleep	0	0.895161	1.23261	1.27103	0.501952	0.596711		0.800006		0.633504		0.925747
Spanish	B	Unwanted memories of the stressful experience	0	0.824219	1.11512	1.14262	0.12032	0.754967	0.884725	0.8524	0.879933	0.668289	0.943826	0.94083	0.956565	256
Spanish		Disturbing dreams of the stressful experience	0	0.421875	0.873212	2.13958	3.75112	0.715753		0.86392		0.655244		0.941288
Spanish		Feeling or acting as if the stressful experience were actually happening again	0	0.558594	0.960231	1.71347	2.13747	0.717857		0.861348		0.650417		0.941207
Spanish		Feeling very upset	0	0.875	1.18156	1.16509	0.191809	0.697604		0.869287		0.716415		0.939992
Spanish		Having strong physical reactions	0	0.554688	0.996532	1.80351	2.33338	0.755133		0.852521		0.787067		0.939104
Spanish	C	Avoiding memories, thoughts, or feelings	0	0.722656	1.06882	1.42952	1.12687	0.69277	0.8185	0.69277	-	0.692021		0.940458
Spanish		Avoiding external reminders	0	0.628906	1.07329	1.62745	1.50401	0.69277		0.69277		0.661285		0.940952
Spanish	D	Trouble remembering important parts	0	1.23047	1.53317	0.755956	-1.05278	0.433282	0.8712	0.895107	0.89277	0.435787		0.946966
Spanish		Having strong negative beliefs about yourself, other people, or the world	0.00390625	0.505882	0.934343	2.04551	3.75554	0.617932		0.858116		0.627377		0.941565
Spanish		Blaming yourself or someone else	0	0.664062	1.05739	1.52994	1.41185	0.58741		0.860544		0.618038		0.941645
Spanish		Having strong negative feelings	0	0.648438	1.10677	1.65549	1.69756	0.70737		0.845328		0.795207		0.938694
Spanish		Loss of interest in activities	0	0.785156	1.16684	1.33591	0.61021	0.741553		0.840055		0.701782		0.940253
Spanish		Feeling distant or cut off	0	0.683594	1.11912	1.51125	1.05642	0.785743		0.83477		0.721637		0.939927
Spanish		Trouble experiencing positive feelings	0	0.640625	1.12535	1.6063	1.37414	0.793544		0.833584		0.759272		0.939277
Spanish	E	Irritable behaviour, angry outbursts, or acting aggressively	0	0.644531	1.05654	1.61646	1.66163	0.627382	0.835208	0.80483	0.902164	0.655306		0.941054
Spanish		Taking too many risks or doing things that could cause you harm	0	0.324219	0.735886	2.64624	7.24299	0.443492		0.837992		0.474971		0.943637
Spanish		Being “super alert” or watchful or on guard	0.00390625	0.929412	1.13417	1.041	0.117931	0.643267		0.801349		0.626955		0.941537
Spanish		Feeling jumpy or easily startled	0.00390625	0.721569	1.07078	1.20025	0.163471	0.689345		0.792038		0.678718		0.940672
Spanish		Having difficulty concentrating	0.00390625	0.886275	1.17671	1.14414	0.174274	0.64943		0.800218		0.695284		0.94037
Spanish		Trouble falling or staying asleep	0.00390625	0.898039	1.21563	1.18993	0.277088	0.6172		0.808129		0.654651		0.941131
Swedish	B	Unwanted memories of the stressful experience	0	0.54386	0.867471	1.31894	0.484391	0.755045	0.878517	0.845401	0.838671	0.593781	0.90577	0.900033	0.922791	57
Swedish		Disturbing dreams of the stressful experience	0	0.22807	0.627283	2.78961	7.2166	0.780541		0.840249		0.65219		0.900099
Swedish		Feeling or acting as if the stressful experience were actually happening again	0	0.280702	0.750104	2.50263	5.04373	0.763335		0.839478		0.616234		0.89997
Swedish		Feeling very upset	0	0.385965	0.647919	1.77389	3.29787	0.46667		0.902978		0.60171		0.900853
Swedish		Having strong physical reactions	0	0.298246	0.70622	2.51524	5.84425	0.830638		0.824019		0.707172		0.89839
Swedish	C	Avoiding memories, thoughts, or feelings	0	0.526316	0.804125	1.4345	1.27723	0.696	0.819334	0.696	-	0.589073		0.900332
Swedish		Avoiding external reminders	0	0.526316	0.868193	1.52921	1.30396	0.696		0.696		0.575167		0.900488
Swedish	D	Trouble remembering important parts	0	2.36842	1.6651	-0.332353	-1.61151	0.326098	0.797901	0.843418	0.846161	0.280032		0.918246
Swedish		Having strong negative beliefs about yourself, other people, or the world	0	0.45614	0.846636	2.12949	4.68359	0.745924		0.743945		0.797866		0.895128
Swedish		Blaming yourself or someone else	0.0175439	0.642857	1.10254	1.68127	1.76367	0.454152		0.785197		0.391675		0.906156
Swedish		Having strong negative feelings	0	0.596491	0.903557	1.57177	2.25091	0.688515		0.749429		0.717173		0.896769
Swedish		Loss of interest in activities	0	0.631579	0.993399	1.51991	1.50558	0.510822		0.775362		0.510213		0.902202
Swedish		Feeling distant or cut off	0	0.631579	0.993399	1.51991	1.50558	0.635744		0.754438		0.697542		0.896921
Swedish		Trouble experiencing positive feelings	0	0.631579	1.06287	1.63312	1.82711	0.62722		0.754058		0.649348		0.898222
Swedish	E	Irritable behaviour, angry outbursts, or acting aggressively	0	0.561404	0.866387	1.75668	3.24661	0.420259	0.76052	0.747402	0.881844	0.476741		0.902878
Swedish		Taking too many risks or doing things that could cause you harm	0	0.157895	0.367884	1.82723	1.3636	0.443479		0.756344		0.566229		0.903661
Swedish		Being “super alert” or watchful or on guard	0	0.508772	0.826412	1.27812	0.238557	0.654572		0.684666		0.722029		0.897127
Swedish		Feeling jumpy or easily startled	0	0.368421	0.697741	1.86014	2.82311	0.470873		0.73498		0.502102		0.902496
Swedish		Having difficulty concentrating	0	0.894737	0.976221	1.11107	0.771644	0.461434		0.740294		0.428283		0.904385
Swedish		Trouble falling or staying asleep	0	0.929825	1.13168	0.860866	-0.498775	0.69657		0.66536		0.565387		0.90094
Total		M	0.000974857	0.626848	0.991728	1.75058	2.69851	0.635849	0.832033	0.796362	0.867234	0.629958	0.92874	0.925257	0.943628	224.333
Total		Max	0.0272727	2.36842	1.6651	3.96676	17.4699	0.880433	0.919464	0.902978	0.921079	0.806607	0.943826	0.946966	0.956565	586
Total		Min	0	0.157895	0.367884	-0.332353	-1.65463	0.173305	0.737665	0.635054	0.775363	0.204119	0.90577	0.895128	0.922791	57
Total		SD	0.00361498	0.31303	0.229342	0.655677	2.99063	0.123658	0.0440352	0.0613701	0.382086	0.10577	0.0118745	0.0127683	0.0106245	148.386
Note. Cluster B = Intrusion; Cluster C = Avoidance; Cluster D = Negative alterations in cognitions and mood; Cluster E = Arousal; Cronbach's alpha if item omitted and split-half reliability of the Cluster C are not reported due to the scale length (two items); N = number of observations; NA = missing data; M = mean; SD = standard deviation; for skewness (SK), values less than -1 or greater than 1…

## Sheet: Table 4. RPQ
		Item level					Total score
Language	Item	NA (%)	M	SD	SK	KU	Item - total correlation	Cronbach's alpha	Cronbach's alpha if item omitted	Split-half reliability	N
Dutch	Headaches	0.00167504	0.917785	1.22781	1.12999	0.0761386	0.583653	0.932306	0.930088	0.939699	597
	Dizziness	0	0.869347	1.17139	1.14829	0.21331	0.581485		0.930017
	Nausea	0	0.261307	0.713292	3.09074	9.63784	0.471551		0.932268
	Noise Sensitivity	0	0.872697	1.20981	1.23769	0.42423	0.6605		0.928
	Sleep Disturbance	0.00335008	1.00168	1.26398	1.01056	-0.22342	0.591201		0.929985
	Fatigue	0.00502513	1.65825	1.34805	0.203105	-1.20976	0.734119		0.926029
	Irritable	0	0.969849	1.17828	1.04121	0.07468	0.717492		0.926491
	Depressed	0.00167504	0.922819	1.16132	1.10136	0.201607	0.733199		0.926103
	Frustrated	0.00502513	1.03199	1.21707	0.969949	-0.12988	0.764493		0.925178
	Forgetful	0	1.33333	1.27881	0.55284	-0.855711	0.729233		0.926126
	Poor Concentration	0.00167504	1.23826	1.23136	0.6678	-0.633488	0.7899		0.92445
	Longer To Think	0	1.28141	1.25768	0.526114	-0.917187	0.743875		0.925712
	Blurred Vision	0.00167504	0.672819	1.04616	1.53436	1.46028	0.548324		0.930647
	Light Sensitivity	0.00167504	0.528523	0.972319	1.9514	3.10389	0.607982		0.929356
	Double Vision	0	0.38191	0.871746	2.59374	6.37386	0.439238		0.932749
	Restless	0.00167504	0.838926	1.12013	1.22876	0.556136	0.762691		0.925441
English	Headaches	0.0044843	1.02252	1.26721	0.993949	-0.188535	0.569454	0.92046	0.917236	0.947418	223
English	Dizziness	0	0.825112	1.18203	1.13749	0.00672005	0.573776		0.916943
English	Nausea	0	0.2287	0.648409	3.19602	11.1395	0.521173		0.919079
English	Noise Sensitivity	0	0.686099	1.12712	1.51729	1.23291	0.626787		0.915431
English	Sleep Disturbance	0	1.16143	1.37577	0.867185	-0.582928	0.538125		0.918656
English	Fatigue	0.0044843	1.68919	1.36795	0.114867	-1.2732	0.661806		0.914472
English	Irritable	0	1.08072	1.26375	0.822145	-0.604255	0.688002		0.913532
English	Depressed	0	1.06278	1.17236	0.613595	-0.940872	0.674061		0.914034
English	Frustrated	0	1.28251	1.27555	0.51391	-0.974308	0.741684		0.911811
English	Forgetful	0	1.44395	1.32721	0.407935	-1.08326	0.729263		0.912168
English	Poor Concentration	0.0044843	1.25225	1.33839	0.629157	-0.939037	0.785338		0.910266
English	Longer To Think	0.0044843	1.23423	1.27599	0.573068	-0.91118	0.78075		0.910549
English	Blurred Vision	0	0.560538	1.03744	1.74274	1.93816	0.53291		0.917946
English	Light Sensitivity	0.0044843	0.45045	0.904876	2.13503	4.01314	0.487711		0.919032
English	Double Vision	0	0.408072	0.934488	2.34372	4.66161	0.359839		0.921871
English	Restless	0	0.695067	1.03381	1.38549	0.957598	0.653345		0.914897
Finish	Headaches	0	1.08451	1.18656	0.78183	-0.496165	0.407027	0.92367	0.925672	0.95191	213
Finish	Dizziness	0	0.995305	1.19155	0.82488	-0.525321	0.616267		0.919467
Finish	Nausea	0	0.305164	0.626326	1.96452	2.89384	0.489734		0.922906
Finish	Noise Sensitivity	0.00469484	0.589623	1.01947	1.68117	1.81784	0.664449		0.918113
Finish	Sleep Disturbance	0	1.18779	1.28945	0.753306	-0.631373	0.525725		0.922699
Finish	Fatigue	0	1.38028	1.33917	0.507359	-1.04708	0.779946		0.914273
Finish	Irritable	0.00469484	0.825472	1.07655	1.21041	0.700033	0.678799		0.91762
Finish	Depressed	0	0.694836	1.05322	1.37572	0.844629	0.663702		0.918071
Finish	Frustrated	0.00469484	0.787736	1.05185	1.13363	0.225053	0.764809		0.915311
Finish	Forgetful	0	1.11737	1.14938	0.736014	-0.342012	0.631612		0.918947
Finish	Poor Concentration	0	1.07512	1.20689	0.802045	-0.545335	0.759619		0.91502
Finish	Longer To Think	0.00469484	0.773585	1.08224	1.16969	0.253178	0.737477		0.915963
Finish	Blurred Vision	0.00469484	0.627358	1.0566	1.71673	2.16434	0.623456		0.919157
Finish	Light Sensitivity	0	0.586854	1.0498	1.77979	2.16927	0.590142		0.920052
Finish	Double Vision	0	0.347418	0.906713	2.74229	6.79121	0.492115		0.922417
Finish	Restless	0	0.671362	1.01171	1.5029	1.53796	0.709026		0.916965
French	Headaches	0.00869565	0.964912	1.24751	1.04151	-0.163967	0.550395	0.917665	0.914488	0.942211	115
French	Dizziness	0.0173913	0.769912	1.13396	1.25501	0.501646	0.572194		0.913814
French	Nausea	0.00869565	0.350877	0.830635	2.58684	6.49868	0.493844		0.916062
French	Noise Sensitivity	0	1.03478	1.26997	0.878004	-0.600105	0.652273		0.911437
French	Sleep Disturbance	0	1.16522	1.33726	0.812483	-0.612899	0.583613		0.913625
French	Fatigue	0	1.75652	1.41788	0.100862	-1.35993	0.624324		0.912449
French	Irritable	0	1.28696	1.35572	0.732504	-0.730289	0.679117		0.910554
French	Depressed	0	1.04348	1.35977	0.980519	-0.427683	0.694115		0.910059
French	Frustrated	0.0173913	1.31858	1.384	0.585214	-1.05402	0.768034		0.907547
French	Forgetful	0	1.66957	1.28228	0.230809	-1.0515	0.698582		0.909992
French	Poor Concentration	0	1.48696	1.30697	0.460566	-0.937236	0.699427		0.909931
French	Longer To Think	0	1.21739	1.24099	0.62479	-0.845821	0.724212		0.909295
French	Blurred Vision	0.00869565	0.973684	1.28614	0.988554	-0.398623	0.508404		0.915829
French	Light Sensitivity	0.00869565	0.868421	1.19374	1.24184	0.460064	0.552001		0.91438
French	Double Vision	0.0173913	0.371681	1.01941	2.77692	6.49888	0.33318		0.919627
French	Restless	0.0173913	0.778761	1.09164	1.37964	1.0568	0.641692		0.912036
German	Headaches	0	0.875	1.23632	1.18695	0.126687	0.42565	0.888118	0.887491	0.926819	80
German	Dizziness	0	1.2125	1.40247	0.766579	-0.83868	0.358639		0.892856
German	Nausea	0	0.05	0.270957	5.73064	34.3099	0.248978		0.890303
German	Noise Sensitivity	0	0.925	1.21983	1.00879	-0.278907	0.632787		0.877683
German	Sleep Disturbance	0	0.875	1.19466	1.07356	-0.075097	0.633812		0.877608
German	Fatigue	0	1.125	1.19466	0.597952	-1.06923	0.69325		0.874808
German	Irritable	0	0.65	1.02005	1.3631	0.745641	0.576704		0.880128
German	Depressed	0	0.525	0.913679	1.54954	1.1307	0.545712		0.881488
German	Frustrated	0	0.7125	1.02121	1.14976	-0.054878	0.694305		0.875433
German	Forgetful	0	0.875	1.1515	1.02694	-0.164059	0.729375		0.873247
German	Poor Concentration	0	0.825	1.06468	1.02997	-0.0710309	0.746357		0.872988
German	Longer To Think	0	0.7375	1.04025	1.19671	0.335157	0.694023		0.875335
German	Blurred Vision	0	0.4875	1.00623	2.38943	5.15318	0.449624		0.885025
German	Light Sensitivity	0	0.3625	0.750422	2.33115	5.99781	0.46476		0.884496
German	Double Vision	0	0.0625	0.243589	3.54722	10.7172	0.2476		0.890435
German	Restless	0	0.35	0.730874	2.05742	3.38781	0.590486		0.881063
Italian	Headaches	0	0.902985	1.12759	1.00214	-0.137361	0.471914	0.912807	0.911517	0.944431	268
Italian	Dizziness	0	0.701493	1.0424	1.34717	0.896846	0.429611		0.912461
Italian	Nausea	0	0.287313	0.644414	2.41326	5.5111	0.386575		0.913061
Italian	Noise Sensitivity	0	0.735075	1.05325	1.42238	1.18714	0.650044		0.906048
Italian	Sleep Disturbance	0	1	1.19612	1.08584	0.168187	0.596762		0.907674
Italian	Fatigue	0.00373134	1.30712	1.24577	0.604249	-0.68795	0.613175		0.907199
Italian	Irritable	0	1.10821	1.22683	0.849138	-0.485043	0.725214		0.903248
Italian	Depressed	0	0.985075	1.20849	0.979824	-0.233924	0.713302		0.903694
Italian	Frustrated	0	0.981343	1.13657	0.997022	0.116082	0.663086		0.905483
Italian	Forgetful	0	1.41045	1.23442	0.461205	-0.802519	0.630556		0.906572
Italian	Poor Concentration	0	1.24254	1.2105	0.564852	-0.776432	0.730128		0.903104
Italian	Longer To Think	0	0.966418	1.13951	0.973249	-0.0511571	0.719524		0.90364
Italian	Blurred Vision	0	0.656716	1.09205	1.65247	1.69386	0.553739		0.908922
Italian	Light Sensitivity	0	0.686567	1.08388	1.57417	1.53665	0.607564		0.907281
Italian	Double Vision	0	0.477612	0.945848	2.10139	3.64211	0.432527		0.912122
Italian	Restless	0	0.701493	1.0388	1.4751	1.38666	0.622563		0.906892
Norwegian	Headaches	0	0.897338	1.16276	0.866796	-0.699971	0.602178	0.922279	0.918309	0.934409	263
Norwegian	Dizziness	0.00380228	0.774809	1.09634	1.12939	0.154684	0.577626		0.918907
Norwegian	Nausea	0.00380228	0.21374	0.625237	2.99851	8.22208	0.451052		0.921996
Norwegian	Noise Sensitivity	0	0.722433	1.12694	1.27441	0.390528	0.637863		0.917171
Norwegian	Sleep Disturbance	0	0.91635	1.20457	1.11286	0.115677	0.551631		0.920021
Norwegian	Fatigue	0	1.38023	1.31633	0.379581	-1.13279	0.71864		0.914786
Norwegian	Irritable	0	0.840304	1.07592	1.05132	0.142155	0.710571		0.915063
Norwegian	Depressed	0.00380228	0.652672	1.02347	1.34879	0.651277	0.615192		0.917811
Norwegian	Frustrated	0	0.920152	1.13131	0.99122	-0.101426	0.773354		0.913041
Norwegian	Forgetful	0	1.1635	1.21688	0.686945	-0.607629	0.706265		0.915078
Norwegian	Poor Concentration	0	0.992395	1.19475	0.843952	-0.489355	0.80072		0.911997
Norwegian	Longer To Think	0	0.984791	1.1721	0.780233	-0.663866	0.716864		0.914737
Norwegian	Blurred Vision	0	0.589354	0.980049	1.56816	1.44957	0.590411		0.918492
Norwegian	Light Sensitivity	0	0.441065	0.892797	1.94006	2.89889	0.529227		0.920043
Norwegian	Double Vision	0	0.1673	0.51184	2.95804	7.32966	0.291905		0.924462
Norwegian	Restless	0	0.661597	1.04641	1.50141	1.36646	0.660944		0.916529
Spanish	Headaches	0	0.984252	1.23188	0.851116	-0.639276	0.509982	0.91751	0.915695	0.923228	254
Spanish	Dizziness	0	0.874016	1.23514	1.09147	-0.130282	0.505777		0.915837
Spanish	Nausea	0	0.216535	0.691823	3.39769	10.9359	0.418256		0.91746
Spanish	Noise Sensitivity	0.00393701	0.758893	1.18572	1.33919	0.521986	0.642381		0.911563
Spanish	Sleep Disturbance	0.00393701	0.940711	1.22168	1.07509	-0.0497544	0.644868		0.911477
Spanish	Fatigue	0.00393701	1.14229	1.37563	0.755684	-0.871231	0.687076		0.910167
Spanish	Irritable	0	0.948819	1.21313	0.904579	-0.543957	0.625618		0.912077
Spanish	Depressed	0	0.933071	1.27899	1.05035	-0.314464	0.668184		0.910734
Spanish	Frustrated	0	0.799213	1.15372	1.1483	-0.0915526	0.650802		0.911337
Spanish	Forgetful	0	1.15354	1.24	0.69978	-0.702451	0.651839		0.911257
Spanish	Poor Concentration	0.00393701	1.01976	1.28004	0.89049	-0.610974	0.75048		0.907991
Spanish	Longer To Think	0.00393701	0.735178	1.20722	1.40518	0.580098	0.643883		0.911509
Spanish	Blurred Vision	0	0.574803	1.12829	1.87034	2.23488	0.598371		0.912887
Spanish	Light Sensitivity	0	0.57874	1.09963	1.80796	1.9495	0.627902		0.912071
Spanish	Double Vision	0.00393701	0.339921	0.927462	2.75966	6.5886	0.485693		0.915863
Spanish	Restless	0	0.531496	1.02392	1.92884	2.74894	0.676477		0.910944
Swedish	Headaches	0	0.728814	0.997073	1.06162	-0.194646	0.510997	0.886579	0.880953	0.818073	59
Swedish	Dizziness	0	1.01695	1.21046	0.713653	-0.75954	0.473867		0.882924
Swedish	Nausea	0	0.135593	0.507109	4.13119	17.7844	0.23768		0.888462
Swedish	Noise Sensitivity	0	0.983051	1.23862	0.834173	-0.672747	0.64705		0.87516
Swedish	Sleep Disturbance	0	1.16949	1.19124	0.64032	-0.757172	0.597731		0.877411
Swedish	Fatigue	0	1.49153	1.35663	0.180495	-1.46611	0.702729		0.872392
Swedish	Irritable	0	0.813559	1.09031	1.30697	0.874927	0.607883		0.877085
Swedish	Depressed	0	0.915254	0.933812	0.538981	-0.913759	0.612554		0.877542
Swedish	Frustrated	0	0.813559	0.9909	1.10159	0.554936	0.559661		0.879188
Swedish	Forgetful	0	1.32203	1.23792	0.617926	-0.676194	0.637361		0.875612
Swedish	Poor Concentration	0	1.15254	1.09566	0.7078	-0.274581	0.651224		0.875296
Swedish	Longer To Think	0	1.10169	1.02881	0.454632	-1.02864	0.655357		0.875442
Swedish	Blurred Vision	0	0.711864	1.18977	1.64423	1.6184	0.384361		0.88664
Swedish	Light Sensitivity	0.0169492	0.758621	1.09721	1.33799	0.887544	0.546783		0.879552
Swedish	Double Vision	0.0169492	0.344828	0.909052	2.86647	7.68739	0.326511		0.887106
Swedish	Restless	0.0169492	0.517241	0.842748	1.93447	4.10691	0.386778		0.885061
Total	M	0.00182848	0.858322	1.1051	1.30784	1.36783	0.602994	0.913488	0.908144	0.925355	230.222
Total	Max	0.0173913	1.75652	1.41788	5.73064	34.3099	0.80072	0.932306	0.932749	0.95191	597
Total	Min	0	0.05	0.243589	0.100862	-1.46611	0.23768	0.886579	0.872392	0.818073	59
Total	SD	0.00403852	0.350096	0.208017	0.831813	4.07051	0.123056	0.0149048	0.0161955	0.0390713	150.747
Note. N = number of observations; NA = missing data; M = mean; SD = standard deviation; for skewness (SK), values less than -1 or greater than 1 indicate highly skewed distribution; values from ±1 to ±0.5 show that the distribution is moderately skewed; values from -0.5 and 0.5 indicate a symmetrical distribution. For asymmetry and kurtosis (KU), the values from -2 and +2 are considered acceptabl…

## Sheet: Table 5. QOLIBRI
	Dutch				Englisch				Finnish					French				German				Italian					Norwegian				Spanish				Swedish
Item	Item - total correlation	Cronbach's alpha	Cronbach's alpha im item omited	Split-half	Item - total correlation	Cronbach's alpha	Cronbach's alpha im item omited	Split-half	Item - total correlation	Cronbach's alpha	Cronbach's alpha im item omited	Split-half	Item	Item - total correlation	Cronbach's alpha	Cronbach's alpha im item omited	Split-half	Item - total correlation	Cronbach's alpha	Cronbach's alpha im item omited	Split-half	Item - total correlation	Cronbach's alpha	Cronbach's alpha im item omited	Split-half	Item	Item - total correlation	Cronbach's alpha	Cronbach's alpha im item omited	Split-half	Item - total correlation	Cronbach's alpha	Cronbach's alpha im item omited	Split-half	Item - total correlation	Cronbach's alpha	Cronbach's alpha im item omited	Split-half
Concentrate	0.653306	0.96247	0.96133	0.974811	0.710077	0.964167	0.962836	0.980006	0.703069	0.964417	0.963125	0.982843	Concentrate	0.646229	0.970384	0.969722	0.977825	0.678693	0.958913	0.95753	0.977428	0.71666	0.96548	0.964213	0.980495	Concentrate	0.683826	0.963387	0.962128	0.975488	0.671937	0.958555	0.957098	0.973609	0.447714	0.948732	0.948146	0.979732
Express yourself	0.635389		0.961475		0.605423		0.963403		0.730814		0.963035		Express yourself	0.648164		0.969814		0.620036		0.957778		0.678297		0.964443		Express yourself	0.62903		0.962436		0.641138		0.957323		0.522576		0.947669
Remember	0.677133		0.961203		0.619793		0.963299		0.636354		0.963475		Remember	0.72715		0.969357		0.611678		0.95786		0.651211		0.964529		Remember	0.647011		0.962333		0.611606		0.957432		0.562288		0.947387
Plan and problem solve	0.721849		0.961017		0.75752		0.962624		0.727388		0.963032		Plan and problem solve	0.707079		0.969536		0.700685		0.957254		0.694843		0.964335		Plan and problem solve	0.757916		0.961738		0.664753		0.957185		0.528795		0.947626
Decisions	0.732617		0.960963		0.720565		0.962803		0.779263		0.962759		Decisions	0.71172		0.969485		0.697937		0.9574		0.76152		0.964075		Decisions	0.751137		0.961779		0.718363		0.956872		0.641147		0.946945
Find way	0.614264		0.961576		0.668002		0.963113		0.649593		0.963418		Find way	0.641323		0.969772		0.589921		0.957931		0.663367		0.964502		Find way	0.623295		0.962471		0.590754		0.957569		0.527168		0.947687
Speed of thinking	0.704653		0.961106		0.696539		0.962937		0.780894		0.962744		Speed of thinking	0.668733		0.969631		0.805312		0.956807		0.759077		0.964062		Speed of thinking	0.739995		0.961857		0.674405		0.957121		0.682052		0.946615
Energy	0.707286		0.961003		0.712942		0.962789		0.736748		0.962912		Energy	0.777277		0.969166		0.785962		0.956845		0.800217		0.963812		Energy	0.771463		0.961583		0.730293		0.956723		0.728999		0.946038
Motivation	0.717222		0.960983		0.739801		0.962682		0.765704		0.962767		Motivation	0.788129		0.96908		0.753326		0.957011		0.805604		0.963793		Motivation	0.733407		0.961834		0.761282		0.956637		0.705387		0.946315
Self-esteem	0.776623		0.960645		0.759569		0.962578		0.802455		0.962551		Self-esteem	0.782234		0.969124		0.765026		0.956916		0.80086		0.963781		Self-esteem	0.768835		0.961699		0.747622		0.956672		0.748231		0.94599
Way you look	0.571367		0.961783		0.664555		0.963065		0.644858		0.96343		Way you look	0.719538		0.969399		0.631812		0.957705		0.765455		0.963928		Way you look	0.620759		0.962476		0.689379		0.956986		0.747231		0.94613
Achievements	0.708116		0.961054		0.674256		0.963026		0.716586		0.963031		Achievements	0.758257		0.969228		0.731207		0.957256		0.654352		0.964576		Achievements	0.767495		0.961644		0.694439		0.956932		0.648287		0.946726
Self-perception	0.71541		0.961061		0.730827		0.962765		0.737387		0.962922		Self-perception	0.770003		0.969212		0.609633		0.957881		0.792216		0.963881		Self-perception	0.782001		0.961698		0.770255		0.956579		0.756367		0.946134
Own future	0.7594		0.960788		0.730977		0.962737		0.817396		0.962442		Own future	0.832053		0.96894		0.809404		0.956727		0.773538		0.963891		Own future	0.772064		0.961645		0.711928		0.956841		0.79906		0.945592
Independence	0.720546		0.960938		0.664022		0.963069		0.686319		0.963222		Independence	0.782014		0.969092		0.703073		0.957313		0.726457		0.964129		Independence	0.63999		0.962375		0.718331		0.956778		0.681931		0.946404
Get out and about	0.670232		0.96125		0.714252		0.962789		0.687585		0.963193		Get out and about	0.718306		0.969384		0.715147		0.957133		0.671293		0.964414		Get out and about	0.651216		0.96231		0.722485		0.956736		0.737891		0.945983
Domestic activities	0.682415		0.961171		0.645526		0.963164		0.687551		0.963209		Domestic activities	0.752255		0.969224		0.678466		0.957396		0.656273		0.964495		Domestic activities	0.710862		0.961954		0.683008		0.956984		0.607771		0.947033
Run personal ﬁnances	0.663564		0.96127		0.669532		0.963058		0.660301		0.963361		Run personal ﬁnances	0.700096		0.969472		0.648619		0.957584		0.675528		0.964405		Run personal ﬁnances	0.617182		0.96249		0.635278		0.957279		0.626783		0.94689
Participation in work	0.725558		0.960889		0.684682		0.962969		0.713658		0.963296		Participation in work	0.782919		0.969051		0.760442		0.956802		0.775026		0.96385		Participation in work	0.672313		0.96229		0.761166		0.956406		0.630874		0.947162
Social-leisure activities	0.753049		0.960701		0.680397		0.962975		0.835623		0.962263		Social-leisure activities	0.787338		0.969045		0.788972		0.956588		0.787746		0.963741		Social-leisure activities	0.701327		0.962012		0.763559		0.956408		0.668715		0.946519
In charge of life	0.813525		0.960442		0.757263		0.962553		0.768493		0.962794		In charge of life	0.854982		0.968842		0.828511		0.956348		0.818648		0.96365		In charge of life	0.768396		0.961717		0.8258		0.956214		0.804854		0.945359
Affection towards others	0.631406		0.961501		0.61731		0.96333		0.597152		0.963681		Affection towards others	0.677514		0.969599		0.763987		0.956913		0.614877		0.96474		Affection towards others	0.6116		0.962559		0.562514		0.957725		0.478187		0.948082
Family members	0.534949		0.961953		0.570426		0.963563		0.535924		0.963969		Family members	0.716611		0.969447		0.426979		0.958767		0.563804		0.964958		Family members	0.562701		0.962777		0.469967		0.95819		0.468577		0.948018
Friends	0.58895		0.961705		0.657192		0.963128		0.684175		0.963255		Friends	0.702761		0.969517		0.662431		0.957578		0.671202		0.964459		Friends	0.523272		0.962952		0.533761		0.95787		0.40913		0.948365
Partner	0.512861		0.962072		0.565299		0.963602		0.461618		0.964325		Partner	0.520818		0.970317		0.438355		0.958894		0.511698		0.965271		Partner	0.46909		0.963342		0.523057		0.957974		0.478281		0.948156
Sex life	0.555133		0.962064		0.598072		0.96361		0.524363		0.964188		Sex life	0.560592		0.970302		0.568573		0.958656		0.61618		0.964787		Sex life	0.449994		0.963743		0.560863		0.957779		0.354512		0.949483
Attitudes of others	0.613746		0.961616		0.679262		0.963023		0.659622		0.963386		Attitudes of others	0.761378		0.969251		0.737914		0.957135		0.608324		0.964759		Attitudes of others	0.670931		0.962315		0.512182		0.957995		0.39675		0.948434
Loneliness	0.589954		0.961697		0.545626		0.96368		0.443483		0.964349		Loneliness	0.6629		0.969667		0.505033		0.958426		0.476051		0.96543		Loneliness	0.545994		0.962854		0.467387		0.958352		0.488349		0.947897
Boredom	0.576185		0.961763		0.479437		0.964123		0.553968		0.963884		Boredom	0.666019		0.969671		0.29802		0.959597		0.481917		0.965492		Boredom	0.527508		0.962968		0.397439		0.958821		0.416261		0.948369
Anxiety	0.563247		0.961829		0.634229		0.963243		0.56176		0.963852		Anxiety	0.695085		0.96951		0.296801		0.959612		0.466625		0.965611		Anxiety	0.587548		0.962644		0.435865		0.958582		0.583783		0.947219
Depression	0.626876		0.96149		0.660744		0.963078		0.606911		0.963635		Depression	0.726778		0.969375		0.468986		0.958703		0.585706		0.964951		Depression	0.661908		0.962252		0.531106		0.957978		0.55304		0.947456
Anger/aggression	0.523683		0.962037		0.550336		0.963725		0.424164		0.964558		Anger/aggression	0.559715		0.970166		0.250889		0.959784		0.342117		0.966303		Anger/aggression	0.529037		0.96293		0.324651		0.959452		0.348245		0.948934
Slowness/clumsy	0.609416		0.961619		0.574171		0.963586		0.570575		0.96388		Slowness/clumsy	0.654178		0.969722		0.516826		0.958409		0.649662		0.964565		Slowness/clumsy	0.561602		0.962792		0.65095		0.9572		0.519113		0.947737
Other injuries	0.393285		0.963222		0.400309		0.964655		0.338963		0.964887		Other injuries	0.409154		0.97115		0.525055		0.958418		0.54515		0.965242		Other injuries	0.445493		0.963702		0.426591		0.958931		0.358688		0.949331
Pain	0.501556		0.962403		0.587234		0.963505		0.439064		0.964484		Pain	0.49001		0.970622		0.567679		0.95811		0.525113		0.965269		Pain	0.566212		0.962805		0.527647		0.957999		0.308891		0.949076
See/hear	0.423014		0.962797		0.445852		0.964311		0.428363		0.964541		See/hear	0.414778		0.970868		0.352084		0.959679		0.496354		0.965526		See/hear	0.447353		0.963406		0.520538		0.958132		0.481814		0.948031
TBI effects	0.593267		0.961757		0.639858		0.96322		0.54423		0.964062		TBI effects	0.629823		0.969822		0.557035		0.958167		0.6562		0.964524		TBI effects	0.635279		0.962415		0.57098		0.957736		0.517504		0.947704
Note. Values in bold represent medium to high effect size (|≥.30|) or at least satisfactory reliability (|≥ .70|).													Note. Values in bold represent medium to high effect size (|≥.30|) or at least satisfactory reliability (|≥ .70|).													Note. Values in bold represent medium to high effect size (|≥.30|) or at least satisfactory reliability (|≥ .70|).

## Sheet: Table 5a. QOLIBRI Cognition
			Item level					Scale level
Language	Scale	Item	NA (%)	M	SD	SK	KU	Item - total correlation	Cronbach's alpha	Cronbach's alpha if item omitted	Split-half reliability	N
Dutch	Cognition	Concentrate	0	3.77358	1.05527	-0.801339	0.159033	0.724999	0.920882	0.912292	0.901217	583
		Express yourself	0.00171527	4.12887	0.919604	-1.23769	1.60485	0.746452		0.909754
		Remember	0	3.7307	1.04924	-0.712752	-0.0390929	0.768507		0.907505
		Plan and problem solve	0.00343053	4.14114	0.974172	-1.2896	1.49304	0.805923		0.903548
		Decisions	0.00171527	4.06014	0.973748	-1.06915	0.79788	0.761349		0.908093
		Find way	0	4.29331	0.914605	-1.55167	2.4453	0.687512		0.9153
		Speed of thinking	0	3.94168	0.970366	-0.89734	0.473176	0.788236		0.905377
English		Concentrate	0	3.61607	1.18848	-0.538608	-0.597828	0.796424	0.922091	0.906133	0.912876	224
		Express yourself	0	4.05804	1.02052	-1.02271	0.543091	0.693323		0.9164
		Remember	0	3.45089	1.18938	-0.329676	-0.833766	0.720297		0.914271
		Plan and problem solve	0	3.87054	1.14282	-0.823718	-0.165449	0.823923		0.903268
		Decisions	0	3.875	1.14919	-0.868135	-0.0748291	0.813145		0.904375
		Find way	0.00446429	4.22422	1.04577	-1.53629	1.87256	0.652166		0.920124
		Speed of thinking	0	3.66071	1.12097	-0.58327	-0.376969	0.799441		0.905899
Finnish		Concentrate	0	3.87923	1.08829	-0.817946	-0.147829	0.727096	0.923749	0.91566	0.928066	207
		Express yourself	0	4.09179	0.998193	-0.795027	-0.407858	0.757614		0.912533
		Remember	0	3.80676	1.10662	-0.514262	-0.771877	0.700462		0.918568
		Plan and problem solve	0	4.1401	1.0262	-1.00466	0.124695	0.840149		0.90428
		Decisions	0	4.13043	1.04156	-1.05563	0.287746	0.815781		0.906608
		Find way	0	4.27053	1.026	-1.46753	1.54575	0.677215		0.920197
		Speed of thinking	0	3.98551	1.04963	-0.973908	0.523057	0.815615		0.906579
French		Concentrate	0	3.72115	1.02831	-0.545037	-0.241136	0.768924	0.929553	0.919516	0.943615	104
		Express yourself	0	3.96154	0.811604	-0.578532	0.511399	0.775727		0.920039
		Remember	0	3.58654	1.11138	-0.447216	-0.492317	0.71965		0.925798
		Plan and problem solve	0.00961538	3.98058	0.918018	-0.941073	0.88193	0.785738		0.917941
		Decisions	0.00961538	3.83495	0.971123	-0.560856	-0.377176	0.808341		0.915527
		Find way	0.00961538	4.1068	0.927918	-1.0847	1.10033	0.786234		0.917831
		Speed of thinking	0.00961538	3.69903	1.02742	-0.402621	-0.564757	0.816155		0.914683
German		Concentrate	0.025974	4.09333	0.887957	-0.636038	-0.503263	0.799211	0.914256	0.895684	0.923353	77
		Express yourself	0	4.22078	0.968224	-1.21645	0.857877	0.708263		0.904477
		Remember	0	4.06494	0.89351	-0.998427	0.946933	0.726038		0.902798
		Plan and problem solve	0	4.1039	1.09526	-1.21089	0.727263	0.82051		0.892299
		Decisions	0	4.24675	0.919895	-1.3975	2.14892	0.713357		0.90393
		Find way	0	4.35065	1.03576	-1.63732	1.85422	0.624582		0.914231
		Speed of thinking	0	4.14286	0.941923	-1.02757	0.604884	0.798228		0.895103
Italian		Concentrate	0	3.69373	1.11152	-0.732803	-0.266406	0.801186	0.931697	0.919239	0.941471	271
		Express yourself	0	3.98155	1.01636	-0.996624	0.504792	0.786542		0.920716
		Remember	0	3.60148	1.11714	-0.619304	-0.263408	0.731949		0.926173
		Plan and problem solve	0	3.98155	1.07653	-1.20579	1.07243	0.813088		0.918031
		Decisions	0	3.97786	1.01446	-1.0375	0.759934	0.787388		0.920647
		Find way	0	4.09225	1.03045	-1.33738	1.47941	0.726039		0.926219
		Speed of thinking	0	3.8893	1.04115	-1.0346	0.813369	0.82314		0.917187
Norwegian		Concentrate	0	3.72874	1.01778	-0.70927	-0.0315664	0.756269	0.925193	0.914614	0.918847	247
		Express yourself	0	3.95951	0.940496	-0.971169	0.806123	0.757991		0.914482
		Remember	0	3.45749	1.09934	-0.550607	-0.351511	0.740162		0.917041
		Plan and problem solve	0	3.93117	0.99558	-0.921371	0.347207	0.830258		0.907122
		Decisions	0	3.92713	0.989145	-0.908975	0.463696	0.801352		0.910072
		Find way	0	4.10121	0.916137	-0.989606	0.703397	0.662807		0.923185
		Speed of thinking	0	3.69231	0.964018	-0.712994	0.25205	0.809886		0.909372
Spanish		Concentrate	0	3.47059	1.04905	-0.493229	-0.405083	0.761634	0.91908	0.905585	0.909158	255
		Express yourself	0	3.74902	0.959694	-0.602628	-0.00328391	0.737609		0.908086
		Remember	0	3.27451	1.06996	-0.175264	-0.566803	0.738601		0.908182
		Plan and problem solve	0	3.74902	0.979991	-0.709583	0.196604	0.777145		0.904075
		Decisions	0	3.72157	1.01025	-0.817597	0.348791	0.774877		0.904179
		Find way	0.00392157	3.87008	0.991491	-0.757374	0.268483	0.652534		0.916459
		Speed of thinking	0.00392157	3.52362	0.99675	-0.470383	-0.0635381	0.807652		0.90085
Swedish		Concentrate	0	4	0.906327	-0.989737	1.00411	0.723676	0.91572	0.90486	0.923445	57
		Express yourself	0	4.03509	0.962974	-1.12905	0.910651	0.800992		0.896575
		Remember	0	3.73684	1.02689	-0.637369	-0.0216575	0.709218		0.907095
		Plan and problem solve	0	4.26316	0.973329	-1.33034	1.2278	0.787424		0.898033
		Decisions	0	4.12281	0.907709	-1.08151	1.17257	0.817412		0.895308
		Find way	0	4.54386	0.846636	-1.78258	2.15319	0.642284		0.912703
		Speed of thinking	0	4.07018	0.96102	-0.966736	0.541821	0.716925		0.905629
Total		M	0.00132705	3.9268	1.00891	-0.908675	0.45973	0.759407	0.922469	0.910609	0.92245	225
		Max	0.025974	4.54386	1.18938	-0.175264	2.4453	0.840149	0.931697	0.926219	0.943615	583
		Min	0	3.27451	0.811604	-1.78258	-0.833766	0.624582	0.914256	0.892299	0.901217	57
		SD	0.00401984	0.249558	0.0794725	0.335786	0.780741	0.0527478	0.00553683	0.00820062	0.0133361	149.046
Note. N = number of observations; NA = missing data; M = mean; SD = standard deviation; for skewness (SK), values less than -1 or greater than 1 indicate highly skewed distribution; values from ±1 to ±0.5 show that the distribution is moderately skewed; values from -0.5 and 0.5 indicate a symmetrical distribution. For asymmetry and kurtosis (KU), the values from -2 and +2 are considered acceptabl…

## Sheet: Table 5b. QOLIBRI Self
			Item level					Scale level
Language	Scale	Item	NA (%)	M	SD	SK	KU	Item - total correlation	Cronbach's alpha	Cronbach's alpha if item omitted	Split-half reliability	N
Dutch	Self	Energy	0.00171527	3.44674	1.14661	-0.526138	-0.507862	0.709955	0.915668	0.907358	0.925599	583
		Motivation	0	3.71184	1.05647	-0.76876	0.140935	0.75191		0.90184
		Self-esteem	0.00171527	3.8488	1.07282	-0.883167	0.162488	0.809378		0.895494
		Way you look	0.00171527	3.99141	0.888788	-1.21671	1.91696	0.647079		0.912253
		Achievements	0.0102916	4.06586	1.01849	-1.19457	1.07213	0.736716		0.903421
		Self-perception	0.00343053	3.92427	0.960126	-1.12065	1.27161	0.791406		0.898203
		Own future	0.00343053	3.80895	1.01522	-0.915095	0.522657	0.756235		0.901393
English		Energy	0	3.28125	1.28336	-0.35457	-0.962322	0.703729	0.91959	0.912813	0.940752	224
		Motivation	0	3.5	1.1904	-0.508136	-0.670038	0.757451		0.906693
		Self-esteem	0	3.51339	1.19408	-0.479914	-0.666913	0.816979		0.900516
		Way you look	0	3.50446	1.21278	-0.55095	-0.5693	0.694891		0.913152
		Achievements	0	3.88393	1.16946	-0.830257	-0.218911	0.731268		0.90935
		Self-perception	0	3.58929	1.12894	-0.621435	-0.232637	0.817054		0.90105
		Own future	0	3.57589	1.17277	-0.513903	-0.635877	0.743107		0.908164
Finnish		Energy	0	3.57005	1.17567	-0.44379	-0.675239	0.717112	0.935386	0.932256	0.955869	207
		Motivation	0	3.69082	1.13251	-0.51489	-0.606288	0.782446		0.926105
		Self-esteem	0.00483092	3.81068	1.15107	-0.717228	-0.50666	0.848617		0.919908
		Way you look	0	3.6715	1.12272	-0.521479	-0.644417	0.734582		0.930408
		Achievements	0.00483092	3.96117	1.15545	-0.963258	-0.00424094	0.781072		0.926233
		Self-perception	0	3.73913	1.13615	-0.68587	-0.317642	0.835773		0.921186
		Own future	0	3.7343	1.18728	-0.657102	-0.58096	0.832806		0.921319
French		Energy	0	3.33654	1.05766	-0.205554	-0.530301	0.756348	0.938391	0.93255	0.945065	104
		Motivation	0	3.46154	1.12278	-0.43485	-0.582876	0.826664		0.926183
		Self-esteem	0	3.38462	1.09107	-0.572962	-0.299796	0.823309		0.926491
		Way you look	0	3.43269	1.08623	-0.594036	-0.141398	0.767173		0.931654
		Achievements	0	3.67308	1.09227	-0.795747	-0.102089	0.76979		0.931437
		Self-perception	0	3.36538	1.03396	-0.554769	-0.113101	0.852148		0.924133
		Own future	0.0192308	3.51961	1.05051	-0.482514	-0.411162	0.793031		0.929301
German		Energy	0.038961	3.7027	0.989392	-0.395164	-0.548339	0.777579	0.917535	0.901686	0.923462	77
		Motivation	0	3.79221	1.00443	-0.506373	-0.51001	0.793878		0.899904
		Self-esteem	0	4.06494	1.0303	-0.911221	-0.0623056	0.770096		0.902576
		Way you look	0	4	0.986754	-0.973228	0.643801	0.640593		0.916004
		Achievements	0	4.33766	0.897517	-1.45466	1.89336	0.706571		0.909068
		Self-perception	0	4.09091	0.876323	-0.636361	-0.443459	0.714932		0.908387
		Own future	0	3.98701	0.979977	-0.719726	-0.152509	0.822886		0.896855
Italian		Energy	0	3.53875	1.10444	-0.631828	-0.240395	0.794892	0.93797	0.92853	0.948625	271
		Motivation	0	3.71956	1.0966	-0.875434	0.205338	0.81923		0.926323
		Self-esteem	0	3.60886	1.13617	-0.797039	-0.0768591	0.853069		0.923064
		Way you look	0	3.54982	1.1849	-0.757066	-0.313137	0.805029		0.927798
		Achievements	0	4.22878	0.965738	-1.52436	2.23776	0.6659		0.939337
		Self-perception	0	3.7417	1.07138	-0.915689	0.314374	0.839477		0.924611
		Own future	0	3.51292	1.17647	-0.690272	-0.354753	0.804252		0.927828
Norwegian		Energy	0	3.2834	1.13367	-0.40131	-0.564212	0.783424	0.927491	0.915606	0.938845	247
		Motivation	0	3.51417	1.0663	-0.347348	-0.626146	0.762586		0.917254
		Self-esteem	0	3.74494	0.973075	-0.741129	0.291676	0.82892		0.910927
		Way you look	0.00404858	3.56098	0.948867	-0.688316	0.318382	0.696195		0.923245
		Achievements	0	3.79352	1.05628	-0.696713	-0.115773	0.752571		0.918215
		Self-perception	0	3.72065	0.910027	-0.810549	0.645266	0.827243		0.911906
		Own future	0.00404858	3.78862	1.01621	-0.849214	0.378427	0.758707		0.917478
Spanish		Energy	0	3.43529	1.1024	-0.337016	-0.659728	0.742969	0.927474	0.919137	0.9449	255
		Motivation	0	3.50588	1.01124	-0.493787	-0.371361	0.791113		0.914521
		Self-esteem	0	3.43922	1.0477	-0.453448	-0.378556	0.812982		0.91221
		Way you look	0	3.43529	1.06978	-0.408821	-0.432128	0.741862		0.919103
		Achievements	0	3.70196	1.1107	-0.770099	0.00499578	0.705512		0.922947
		Self-perception	0	3.54118	1.01818	-0.601578	-0.0665136	0.875238		0.906474
		Own future	0	3.34902	1.09029	-0.320694	-0.623042	0.732864		0.920073
Swedish		Energy	0	3.52632	1.18179	-0.571868	-0.617385	0.70747	0.919047	0.91205	0.930794	57
		Motivation	0	3.63158	1.07954	-0.585904	-0.146871	0.707751		0.911053
		Self-esteem	0	3.7193	1.08157	-0.604207	-0.362187	0.79026		0.902503
		Way you look	0	3.64912	0.990873	-0.462756	-0.442917	0.719128		0.90992
		Achievements	0	4.14035	1.10903	-1.04383	-0.0844835	0.714824		0.910487
		Self-perception	0	3.85965	0.953164	-0.332665	-0.943689	0.833027		0.899677
		Own future	0	3.75439	1.09023	-0.895039	0.188353	0.796531		0.901813
Total		M	0.00155951	3.68203	1.07376	-0.679889	-0.109655	0.769486	0.926506	0.915229	0.939323	225
		Max	0.038961	4.33766	1.28336	-0.205554	2.23776	0.875238	0.938391	0.939337	0.955869	583
		Min	0	3.28125	0.876323	-1.52436	-0.962322	0.640593	0.915668	0.895494	0.923462	57
		SD	0.00561148	0.235924	0.0869386	0.26633	0.652752	0.0536569	0.00859854	0.010909	0.0102982	149.046
Note. N = number of observations; NA = missing data; M = mean; SD = standard deviation; for skewness (SK), values less than -1 or greater than 1 indicate highly skewed distribution; values from ±1 to ±0.5 show that the distribution is moderately skewed; values from -0.5 and 0.5 indicate a symmetrical distribution. For asymmetry and kurtosis (KU), the values from -2 and +2 are considered acceptabl…

## Sheet: Table 5c. QOLIBRI Daily Life
			Item level					Scale level
Language	Scale	Item	NA (%)	M	SD	SK	KU	Item - total correlation	Cronbach's alpha	Cronbach's alpha if item omitted	Split-half reliability	N
Dutch	Daily Life and Autonomy	Independence	0.00686106	4.08117	1.10924	-1.24582	0.872495	0.806547	0.932857	0.920404	0.949836	583
		Get out and about	0.00171527	4.29897	1.02295	-1.65144	2.21519	0.764862		0.924567
		Domestic activities	0.00171527	4.1701	1.05784	-1.35227	1.19803	0.801491		0.921157
		Run personal ﬁnances	0.00857633	4.19723	1.07074	-1.505	1.69536	0.711948		0.928966
		Participation in work	0.101201	3.65458	1.32809	-0.788183	-0.533796	0.798938		0.922334
		Social-leisure activities	0.00857633	3.70415	1.25474	-0.823074	-0.285178	0.80095		0.921255
		In charge of life	0.00343053	3.98623	1.07149	-1.17317	0.926605	0.828086		0.918674
English		Independence	0	3.9375	1.20374	-0.95561	-0.127217	0.754998	0.927095	0.917409	0.949089	224
		Get out and about	0	3.91964	1.25379	-0.909135	-0.28041	0.861837		0.906962
		Domestic activities	0	4.02232	1.21073	-1.06878	-2.43424e-05	0.755704		0.917319
		Run personal ﬁnances	0.00446429	4.06726	1.14685	-1.16532	0.438598	0.72432		0.920367
		Participation in work	0.0401786	3.45116	1.48078	-0.481106	-1.19183	0.771151		0.916936
		Social-leisure activities	0.00446429	3.37668	1.4052	-0.354394	-1.18889	0.734103		0.9201
		In charge of life	0.00446429	3.83857	1.25954	-0.813513	-0.461515	0.807128		0.912268
Finnish		Independence	0	4.15942	1.06064	-1.19308	0.593813	0.768348	0.922327	0.91033	0.937432	207
		Get out and about	0	4.18841	1.16929	-1.36457	0.734459	0.787094		0.907666
		Domestic activities	0	4.23671	1.07803	-1.40265	1.15744	0.79739		0.907537
		Run personal ﬁnances	0	4.28502	1.03854	-1.4654	1.43814	0.707519		0.915778
		Participation in work	0.0628019	3.64433	1.63266	-0.664865	-1.25396	0.727759		0.921351
		Social-leisure activities	0	3.72947	1.33811	-0.698739	-0.791116	0.785294		0.907925
		In charge of life	0	4.19324	1.06641	-1.29581	0.887231	0.838331		0.904016
French		Independence	0	3.47115	1.15714	-0.377404	-0.732449	0.737056	0.931019	0.924317	0.940415	104
		Get out and about	0	3.71154	1.17145	-0.724845	-0.248514	0.767283		0.921504
		Domestic activities	0.00961538	3.59223	1.17521	-0.614224	-0.479908	0.798328		0.918545
		Run personal ﬁnances	0.00961538	3.75728	1.1416	-1.00971	0.369268	0.703405		0.927353
		Participation in work	0.0961538	3.26596	1.32125	-0.434954	-1.04531	0.826476		0.916039
		Social-leisure activities	0.0192308	3.43137	1.21468	-0.432359	-0.827189	0.797402		0.91862
		In charge of life	0	3.53846	1.05133	-0.596943	-0.19346	0.835396		0.916135
German		Independence	0.038961	4.27027	0.983387	-1.48779	1.88203	0.780317	0.927346	0.916659	0.952146	77
		Get out and about	0	4.24675	1.17155	-1.69104	1.97238	0.80837		0.912421
		Domestic activities	0	4.16883	1.08097	-1.44306	1.58971	0.750815		0.918227
		Run personal ﬁnances	0	4.16883	1.05634	-1.32571	1.23143	0.635309		0.928257
		Participation in work	0.168831	3.73438	1.40568	-0.779701	-0.74003	0.829543		0.911235
		Social-leisure activities	0.012987	3.67105	1.27946	-0.622772	-0.741608	0.783166		0.915168
		In charge of life	0	4.03896	1.20789	-1.22306	0.464517	0.830697		0.910058
Italian		Independence	0	3.90406	1.1918	-1.05803	0.201721	0.835436	0.941757	0.930226	0.941759	271
		Get out and about	0	3.92989	1.25855	-1.02354	-0.0741841	0.838532		0.929818
		Domestic activities	0	3.91513	1.17228	-1.0453	0.255211	0.789856		0.934224
		Run personal ﬁnances	0	3.92251	1.13753	-1.17238	0.758535	0.734267		0.938878
		Participation in work	0.0110701	3.6306	1.23983	-0.710006	-0.495355	0.824346		0.931121
		Social-leisure activities	0.00738007	3.49442	1.34559	-0.615312	-0.799275	0.823522		0.931588
		In charge of life	0	3.75646	1.18623	-0.903068	-0.0817596	0.808116		0.932627
Norwegian		Independence	0	4.08502	0.96106	-1.09966	0.934798	0.718243	0.89735	0.880993	0.918613	247
		Get out and about	0	4.19433	0.989112	-1.29748	1.28135	0.751495		0.877092
		Domestic activities	0	3.95547	1.145	-1.12707	0.544394	0.725889		0.879252
		Run personal ﬁnances	0	4.20243	0.991588	-1.3327	1.35518	0.608377		0.892242
		Participation in work	0.0121457	3.57787	1.3233	-0.70351	-0.649488	0.69839		0.885585
		Social-leisure activities	0	3.64777	1.13043	-0.577442	-0.449008	0.700599		0.88231
		In charge of life	0.00404858	4	0.956183	-0.892777	0.540238	0.746978		0.878072
Spanish		Independence	0	3.76078	1.12664	-0.740767	-0.276415	0.820737	0.935716	0.923217	0.946361	255
		Get out and about	0	3.95686	1.15446	-1.00208	0.107101	0.826193		0.922574
		Domestic activities	0	3.85098	1.1473	-0.861316	-0.00868165	0.796363		0.925318
		Run personal ﬁnances	0	3.81961	1.14277	-0.8908	0.132727	0.693843		0.934415
		Participation in work	0.0235294	3.43373	1.32768	-0.465295	-0.911104	0.814836		0.924102
		Social-leisure activities	0.00392157	3.40157	1.27152	-0.354738	-0.979984	0.769374		0.928239
		In charge of life	0	3.76471	1.05719	-0.737775	0.0317566	0.837785		0.922374
Swedish		Independence	0.0175439	3.96429	1.24994	-1.25085	0.466234	0.783572	0.917892	0.901631	0.956809	57
		Get out and about	0	4.21053	1.16092	-1.41505	1.01882	0.746682		0.90575
		Domestic activities	0.0175439	4.10714	1.12296	-1.11426	0.313615	0.749101		0.905804
		Run personal ﬁnances	0.0175439	4.23214	1.11177	-1.54695	1.66824	0.722293		0.908344
		Participation in work	0.0526316	3.38889	1.60679	-0.418797	-1.47324	0.726978		0.912536
		Social-leisure activities	0.0175439	3.42857	1.24838	-0.446192	-0.713501	0.750187		0.905094
		In charge of life	0	4.03509	1.22423	-1.1554	0.314226	0.80373		0.899682
Total		Mean	0.0125198	3.86953	1.18505	-0.969747	0.183435	0.77243	0.925929	0.914619	0.943607	225
		Max	0.168831	4.29897	1.63266	-0.354394	2.21519	0.861837	0.941757	0.938878	0.956809	583
		Min	0	3.26596	0.956183	-1.69104	-1.47324	0.608377	0.89735	0.877092	0.918613	57
		SD	0.0287084	0.284783	0.138491	0.360455	0.908956	0.0512668	0.0121982	0.0145116	0.0106261	149.046
Note. N = number of observations; NA = missing data; M = mean; SD = standard deviation; for skewness (SK), values less than -1 or greater than 1 indicate highly skewed distribution; values from ±1 to ±0.5 show that the distribution is moderately skewed; values from -0.5 and 0.5 indicate a symmetrical distribution. For asymmetry and kurtosis (KU), the values from -2 and +2 are considered acceptabl…

## Sheet: Table 5d. QOLIBRI Social
			Item level					Scale level
Language	Scale	Item	NA (%)	M	SD	SK	KU	Item - total correlation	Cronbach's alpha	Cronbach's alpha if item omitted	Split-half reliability	N
Dutch	Social	Affection towards others	0	4.29674	0.905941	-1.51671	2.3386	0.738148	0.862411	0.826116	0.881658	583
		Family members	0.00171527	4.32818	0.86061	-1.57217	2.86911	0.675335		0.837579
		Friends	0.00343053	4.27883	0.885544	-1.50956	2.61904	0.723642		0.829156
		Partner	0.0154374	4.223	1.02793	-1.48433	1.78318	0.690243		0.832763
		Sex life	0.0634648	3.53297	1.34499	-0.600711	-0.836371	0.541229		0.878105
		Attitudes of others	0	4.20926	0.847951	-1.33929	2.41268	0.69105		0.835487
English		Affection towards others	0	4.08482	1.07851	-1.04318	0.330116	0.753408	0.882189	0.853709	0.908469	224
		Family members	0.00446429	4.15695	0.994369	-1.08193	0.43707	0.716128		0.861045
		Friends	0.0178571	4.04091	1.11983	-1.07048	0.267235	0.740239		0.854891
		Partner	0.0178571	3.95	1.27936	-1.00114	-0.194687	0.743436		0.853033
		Sex life	0.0401786	3.1814	1.58546	-0.276614	-1.4994	0.599817		0.889982
		Attitudes of others	0	3.8125	1.11678	-0.686154	-0.363913	0.702806		0.860682
Finnish		Affection towards others	0	4.2029	0.979098	-1.05993	0.280299	0.679299	0.852485	0.820631	0.864508	207
		Family members	0.00966184	4.43415	0.881067	-1.64061	2.26243	0.670993		0.824214
		Friends	0	4.23671	1.00822	-1.35967	1.2782	0.672574		0.821516
		Partner	0.00966184	4.20488	0.998516	-1.41495	1.65718	0.642553		0.827161
		Sex life	0.057971	3.81538	1.25869	-0.839759	-0.405704	0.597655		0.842124
		Attitudes of others	0	4.07246	0.980175	-1.06757	0.71116	0.607096		0.833623
French		Affection towards others	0	4.01923	1.01427	-0.811979	-0.233103	0.778516	0.893673	0.866541	0.94543	104
		Family members	0	4.10577	1.00405	-0.950619	0.0309042	0.725675		0.874273
		Friends	0.00961538	4.02913	0.974743	-0.937936	0.473053	0.711015		0.87676
		Partner	0.0480769	3.81818	1.19833	-0.919501	-0.050849	0.770735		0.865974
		Sex life	0.0865385	3.18947	1.4089	-0.220969	-1.23098	0.629371		0.897613
		Attitudes of others	0.0384615	3.82	1.02868	-0.687591	-0.0204006	0.750934		0.870273
German		Affection towards others	0.0519481	4.31507	1.03919	-1.5231	1.54845	0.804054	0.86786	0.822549	0.89863	77
		Family members	0	4.45455	0.866716	-1.95646	4.39391	0.555187		0.863859
		Friends	0	4.33766	0.926374	-1.68315	2.91714	0.708533		0.841418
		Partner	0.025974	4.26667	1.13105	-1.52189	1.2642	0.696198		0.83988
		Sex life	0.116883	3.42647	1.60518	-0.508965	-1.32859	0.721347		0.85116
		Attitudes of others	0	4.14286	0.969458	-0.966911	0.278453	0.631019		0.851989
Italian		Affection towards others	0	4.2214	0.971284	-1.32139	1.29138	0.665663	0.879761	0.863477	0.894452	271
		Family members	0	4.19926	0.953046	-1.37578	1.82339	0.722296		0.855719
		Friends	0	4	1.04704	-1.23444	1.22467	0.760896		0.847693
		Partner	0.0184502	3.93609	1.24068	-1.16677	0.419929	0.711299		0.855674
		Sex life	0.0258303	3.40909	1.40858	-0.559064	-0.989359	0.638952		0.875456
		Attitudes of others	0	3.90775	0.993858	-0.988504	0.775752	0.703432		0.857599
Norwegian		Affection towards others	0.00404858	4.21138	0.835459	-1.1207	1.16853	0.675026	0.838083	0.802364	0.859718	247
		Family members	0	4.32389	0.83639	-1.07671	0.380037	0.657919		0.805349
		Friends	0	4.22672	0.83448	-0.776091	-0.265374	0.60389		0.814793
		Partner	0.0283401	4.075	1.07199	-1.20376	0.904522	0.6444		0.806057
		Sex life	0.0323887	3.4728	1.26951	-0.675516	-0.49462	0.510654		0.848555
		Attitudes of others	0.00404858	3.93089	0.812718	-0.555599	0.187337	0.713507		0.796573
Spanish		Affection towards others	0	4.11765	0.960787	-1.11057	0.813606	0.708934	0.84285	0.801287	0.885093	255
		Family members	0	4.20784	0.887322	-0.886817	0.0493944	0.620377		0.818878
		Friends	0	3.88235	0.989055	-0.615637	-0.328729	0.653503		0.811178
		Partner	0.00392157	3.94094	1.16625	-0.943098	-0.04605	0.623018		0.818328
		Sex life	0.00784314	3.46245	1.25181	-0.483337	-0.736174	0.533827		0.841824
		Attitudes of others	0	3.84706	0.871769	-0.731118	0.667853	0.660941		0.812525
Swedish		Affection towards others	0	4.33333	0.663684	-0.466764	-0.809747	0.569814	0.757594	0.719291	0.85593	57
		Family members	0.0175439	4.32143	0.896603	-1.54831	2.48065	0.543888		0.712304
		Friends	0.0175439	4.28571	0.755929	-0.754242	-0.0969388	0.418769		0.743075
		Partner	0	4	1.25357	-1.06872	0.0123242	0.618797		0.687338
		Sex life	0.0701754	2.90566	1.37651	-0.268171	-1.3196	0.568391		0.712623
		Attitudes of others	0	4.19298	0.833208	-1.08936	1.80344	0.39206		0.747795
Total		Mean	0.0157284	4.00738	1.04632	-1.0236	0.609345	0.659046	0.85299	0.828886	0.88821	225
		Max	0.116883	4.45455	1.60518	-0.220969	4.39391	0.804054	0.893673	0.897613	0.94543	583
		Min	0	2.90566	0.663684	-1.95646	-1.4994	0.39206	0.757594	0.687338	0.85593	57
		SD	0.0252004	0.339896	0.20309	0.395306	1.25294	0.0844477	0.0383037	0.0457478	0.0267066	149.246
Note. N = number of observations; NA = missing data; M = mean; SD = standard deviation; for skewness (SK), values less than -1 or greater than 1 indicate highly skewed distribution; values from ±1 to ±0.5 show that the distribution is moderately skewed; values from -0.5 and 0.5 indicate a symmetrical distribution. For asymmetry and kurtosis (KU), the values from -2 and +2 are considered acceptabl…

## Sheet: Table 5e. QOLIBRI Emotions
			Item level					Scale level
Language	Scale	Item	NA (%)	M	SD	SK	KU	Item - total correlation	Cronbach's alpha	Cronbach's alpha if item omitted	Split-half reliability	N
Dutch	Emotions	Loneliness	0.00343053	4.00688	1.15965	-1.01993	0.0505638	0.724731	0.866021	0.828396	0.892142	583
		Boredom	0.00171527	4.00344	1.12398	-0.936055	-0.0538583	0.619598		0.854466
		Anxiety	0.00171527	4.13918	1.10368	-1.25	0.771537	0.710896		0.832312
		Depression	0.00171527	3.91581	1.2016	-0.848518	-0.356974	0.778456		0.813788
		Anger/aggression	0.00171527	4.21478	1.07878	-1.37739	1.07901	0.607586		0.856839
English		Loneliness	0	4.12054	1.20117	-1.23579	0.474619	0.678623	0.850882	0.81708	0.859063	224
		Boredom	0	3.72768	1.34329	-0.692035	-0.798778	0.573755		0.843485
		Anxiety	0	3.71429	1.37191	-0.786701	-0.672446	0.73247		0.800561
		Depression	0	3.70982	1.29528	-0.661122	-0.759265	0.763669		0.793054
		Anger/aggression	0	3.92411	1.35546	-0.992445	-0.396221	0.574576		0.843548
Finnish		Loneliness	0	4.45411	0.845646	-1.67816	2.63501	0.562057	0.821227	0.801941	0.870862	207
		Boredom	0.00483092	4.21845	0.980716	-1.24728	1.03985	0.582213		0.795031
		Anxiety	0	4.21256	1.03494	-1.16223	0.387661	0.719426		0.753635
		Depression	0	4.07729	1.1251	-1.0263	-0.0388041	0.707822		0.756367
		Anger/aggression	0	4.24638	1.06679	-1.50165	1.49386	0.517478		0.815365
French		Loneliness	0.0384615	3.97	1.28279	-0.911151	-0.536646	0.734405	0.886167	0.859467	0.89618	104
		Boredom	0.0384615	3.63	1.33072	-0.531906	-1.00488	0.659393		0.876588
		Anxiety	0.0288462	3.69307	1.30952	-0.565133	-0.946862	0.770666		0.85091
		Depression	0.0288462	3.72277	1.40797	-0.720024	-0.891453	0.794353		0.844713
		Anger/aggression	0.0288462	3.83168	1.24955	-0.840762	-0.38118	0.668113		0.87412
German		Loneliness	0.038961	4.43243	1.04791	-1.90219	2.84594	0.749237	0.856467	0.806134	0.887025	77
		Boredom	0	4.33766	1.03378	-1.75434	2.5378	0.565486		0.852994
		Anxiety	0	4.37662	1.03922	-1.61829	1.7243	0.68701		0.82262
		Depression	0	4.22078	1.13118	-1.40186	0.952971	0.744394		0.806702
		Anger/aggression	0	4.38961	0.98883	-1.792	2.6571	0.614404		0.840756
Italian		Loneliness	0.00738007	4.10409	1.20181	-1.12472	0.0498035	0.690162	0.859843	0.82848	0.882458	271
		Boredom	0.00369004	3.72963	1.30948	-0.761272	-0.619154	0.618085		0.845429
		Anxiety	0.00738007	3.71375	1.33964	-0.630377	-0.920075	0.744167		0.812866
		Depression	0.00738007	3.66914	1.37888	-0.671394	-0.870844	0.77224		0.804772
		Anger/aggression	0.00738007	3.71375	1.32845	-0.723931	-0.734555	0.569739		0.857688
Norwegian		Loneliness	0	4.37652	0.954203	-1.53399	1.72388	0.746895	0.850287	0.796373	0.8752	247
		Boredom	0	4.07692	1.00312	-0.875325	-0.0437607	0.595848		0.837408
		Anxiety	0.00404858	4.36179	0.936343	-1.39534	1.00799	0.648188		0.822787
		Depression	0	4.17409	0.994935	-1.042	0.169011	0.730217		0.800252
		Anger/aggression	0	4.38866	0.912177	-1.57447	2.01575	0.587647		0.837844
Spanish		Loneliness	0.00784314	3.66798	1.20533	-0.496748	-0.8193	0.584525	0.855155	0.846095	0.885367	255
		Boredom	0.00392157	3.40551	1.22431	-0.251616	-1.10369	0.70127		0.816872
		Anxiety	0.00392157	3.22047	1.23143	-0.0178726	-1.14582	0.745717		0.80509
		Depression	0.00392157	3.06299	1.25265	0.0739384	-1.08883	0.692562		0.818938
		Anger/aggression	0.00392157	3.18504	1.31321	-0.102237	-1.21734	0.625469		0.83735
Swedish		Loneliness	0	4.36842	0.899039	-1.05935	-0.213886	0.623449	0.862653	0.848731	0.882375	57
		Boredom	0	4.08772	0.968812	-0.865699	-0.24556	0.646277		0.842811
		Anxiety	0	4.12281	1.11915	-1.28845	0.972382	0.779289		0.807521
		Depression	0	4.05263	1.12474	-0.988807	0.0553652	0.823202		0.794751
		Anger/aggression	0	4.42105	1.06817	-1.82764	2.36461	0.555235		0.865952
Total		Mean	0.00618519	3.98206	1.15279	-1.01357	0.247752	0.6738	0.856522	0.825975	0.881186	225
		Max	0.038961	4.45411	1.40797	0.0739384	2.84594	0.823202	0.886167	0.876588	0.89618	583
		Min	0	3.06299	0.845646	-1.90219	-1.21734	0.517478	0.821227	0.753635	0.859063	57
		SD	0.0113509	0.351428	0.151553	0.479529	1.19972	0.0790622	0.0162926	0.0275753	0.0108256	149.529
Note. N = number of observations; NA = missing data; M = mean; SD = standard deviation; for skewness (SK), values less than -1 or greater than 1 indicate highly skewed distribution; values from ±1 to ±0.5 show that the distribution is moderately skewed; values from -0.5 and 0.5 indicate a symmetrical distribution. For asymmetry and kurtosis (KU), the values from -2 and +2 are considered acceptabl…

[truncated: 13 more sheets: Table 5f. QOLIBRI Physical, Table 6. QOLIBRI-OS, Table 7a. SF-36v2 PF, Table 7b. SF-36v2 RP, Table 7c. SF-36v2 BP, Table 7d. SF-36v2 GH, Table 7e. SF-36v2 VT, Table 7f. SF-36v2 SF, Table 7g. SF-36v2 RE, Table 7h. SF-36v2 MH, Table 7i. SF-36v2 PCS, Table 7j. SF-36v2 MCS, Table 8. SF-12v2]
