# Supplementary material for: Psychometric Characteristics of the Patient-Reported Outcome Measures Applied in the CENTER-TBI Study
Source: J Clin Med. 2021 May 28;10(11):2396. doi: 10.3390/jcm10112396 (PMC8199160; doi:10.3390/jcm10112396)
Supplement: Supplementary file 1 [file jcm-10-02396-s001.zip › OS_3_Factorial_validity.xlsx]

## Sheet: Table 1. GAD-7
Language	Item	λ	SE	N
Dutch	Feeling nervous, anxious or on edge	0.885273	0.015272	584
	Not being able to stop or control worrying	0.95948	0.00829694
	Worrying too much about different things	0.963039	0.00720211			min	0.681572
	Having trouble relaxing	0.887036	0.0151628			max	0.963039
	Being so restless that it is hard to sit still	0.823147	0.0231604
	Becoming easily annoyed or irritable	0.828091	0.0202519
	Feeling afraid, as if something awful might happen	0.74971	0.0290739
	M	0.870825	0.0169171
	SD	0.0770311	0.00787782
English	Feeling nervous, anxious or on edge	0.887355	0.0246129	214
	Not being able to stop or control worrying	0.932656	0.0170111
	Worrying too much about different things	0.908076	0.0208167
	Having trouble relaxing	0.849939	0.0298966
	Being so restless that it is hard to sit still	0.799771	0.0420615
	Becoming easily annoyed or irritable	0.725823	0.04472
	Feeling afraid, as if something awful might happen	0.856715	0.0359576
	M	0.851476	0.0307252
	SD	0.0702058	0.0106148
Finnish	Feeling nervous, anxious or on edge	0.945767	0.0227926	207
	Not being able to stop or control worrying	0.891453	0.0281024
	Worrying too much about different things	0.824793	0.0384714
	Having trouble relaxing	0.761839	0.0431679
	Being so restless that it is hard to sit still	0.836335	0.0445346
	Becoming easily annoyed or irritable	0.766816	0.0397479
	Feeling afraid, as if something awful might happen	0.681572	0.0628069
	M	0.815511	0.0399462
	SD	0.0879823	0.0128503
Italian	Feeling nervous, anxious or on edge	0.890277	0.0188906	265
	Not being able to stop or control worrying	0.942746	0.0123987
	Worrying too much about different things	0.955013	0.0142543
	Having trouble relaxing	0.884054	0.0196072
	Being so restless that it is hard to sit still	0.839019	0.0312566
	Becoming easily annoyed or irritable	0.82814	0.028124
	Feeling afraid, as if something awful might happen	0.7774	0.0366646
	M	0.873807	0.023028
	SD	0.0636572	0.00911422
Norwegian	Feeling nervous, anxious or on edge	0.860178	0.0277953	253
	Not being able to stop or control worrying	0.924167	0.0180063
	Worrying too much about different things	0.899358	0.0202815
	Having trouble relaxing	0.912112	0.0205466
	Being so restless that it is hard to sit still	0.711913	0.0455362
	Becoming easily annoyed or irritable	0.682503	0.0471496
	Feeling afraid, as if something awful might happen	0.859211	0.036178
	M	0.835634	0.0307848
	SD	0.0980323	0.0122601
Spanish	Feeling nervous, anxious or on edge	0.805338	0.0261382	253
	Not being able to stop or control worrying	0.889475	0.021285
	Worrying too much about different things	0.838889	0.0221485
	Having trouble relaxing	0.889203	0.0196367
	Being so restless that it is hard to sit still	0.831616	0.0332564
	Becoming easily annoyed or irritable	0.798642	0.0296383
	Feeling afraid, as if something awful might happen	0.748197	0.0449337
	M	0.828766	0.0281481
	SD	0.0506565	0.00884735
Note. M = mean, SD = standard deviation, λ = standardized item loading, SE = standard error, N = number of cases, values in bold respresent item loadings (λ) above .50.

## Sheet: Table 2. PHQ-9
Language	Item	λ	SE	N
Dutch	Little interest or pleasure in doing things	0.871473	0.0171815	587
	Feeling down, depressed, or hopeless	0.906746	0.0151525
	Trouble falling or staying asleep, or sleeping too much	0.714934	0.0272652			min	0.577108
	Feeling tired or having little energy	0.817409	0.0200395			max	0.935942
	Poor appetite or overeating	0.793961	0.0254348
	Feeling bad about yourself	0.815153	0.025855
	Trouble concentrating on things	0.673769	0.0325074
	Moving or speaking so slowly	0.662968	0.0419222
	Thoughts that you would be better off dead or of hurting yourself	0.861196	0.0278566
	M	0.790845	0.0259127
	SD	0.088042	0.00815584
English	Little interest or pleasure in doing things	0.886355	0.0250046	214
	Feeling down, depressed, or hopeless	0.903437	0.0252573
	Trouble falling or staying asleep, or sleeping too much	0.624717	0.0500994
	Feeling tired or having little energy	0.806972	0.0327306
	Poor appetite or overeating	0.753003	0.0403323
	Feeling bad about yourself	0.824268	0.0330455
	Trouble concentrating on things	0.723679	0.0435791
	Moving or speaking so slowly	0.713305	0.0549577
	Thoughts that you would be better off dead or of hurting yourself	0.798042	0.0500939
	M	0.781531	0.0394556
	SD	0.0880353	0.0110752
Finnish	Little interest or pleasure in doing things	0.836864	0.0329232	206
	Feeling down, depressed, or hopeless	0.855949	0.032802
	Trouble falling or staying asleep, or sleeping too much	0.719434	0.0469639
	Feeling tired or having little energy	0.893437	0.028778
	Poor appetite or overeating	0.634825	0.0553935
	Feeling bad about yourself	0.815007	0.0382214
	Trouble concentrating on things	0.783819	0.0442605
	Moving or speaking so slowly	0.755662	0.0538757
	Thoughts that you would be better off dead or of hurting yourself	0.731313	0.0506371
	M	0.780701	0.0426506
	SD	0.0796965	0.00985551
Italian	Little interest or pleasure in doing things	0.831957	0.0258001	265
	Feeling down, depressed, or hopeless	0.890809	0.0233199
	Trouble falling or staying asleep, or sleeping too much	0.65905	0.0464231
	Feeling tired or having little energy	0.807516	0.02698
	Poor appetite or overeating	0.726137	0.0437376
	Feeling bad about yourself	0.787045	0.0365163
	Trouble concentrating on things	0.758663	0.0381467
	Moving or speaking so slowly	0.712864	0.0511769
	Thoughts that you would be better off dead or of hurting yourself	0.835802	0.0401409
	M	0.778871	0.0369157
	SD	0.07192	0.00974364
Norwegian	Little interest or pleasure in doing things	0.873675	0.0234546	254
	Feeling down, depressed, or hopeless	0.935942	0.0162433
	Trouble falling or staying asleep, or sleeping too much	0.7017	0.0434008
	Feeling tired or having little energy	0.766345	0.0364986
	Poor appetite or overeating	0.727986	0.0432993
	Feeling bad about yourself	0.883147	0.0265137
	Trouble concentrating on things	0.787147	0.0359105
	Moving or speaking so slowly	0.699331	0.0493973
	Thoughts that you would be better off dead or of hurting yourself	0.723276	0.052884
	M	0.788728	0.0364002
	SD	0.0879244	0.0122939
Spanish	Little interest or pleasure in doing things	0.90047	0.0215409	253
	Feeling down, depressed, or hopeless	0.930584	0.0183583
	Trouble falling or staying asleep, or sleeping too much	0.648397	0.0451502
	Feeling tired or having little energy	0.805897	0.0265874
	Poor appetite or overeating	0.577108	0.0562202
	Feeling bad about yourself	0.770297	0.0398014
	Trouble concentrating on things	0.81349	0.0315721
	Moving or speaking so slowly	0.758928	0.0477417
	Thoughts that you would be better off dead or of hurting yourself	0.726462	0.0545152
	M	0.770181	0.0379431
	SD	0.111805	0.0140634
Note. M = mean, SD = standard deviation, λ = standardized item loading, SE = standard error, N = number of cases, values in bold respresent item loadings (λ) above .50.

## Sheet: Table 3. PCL-5
Language	DSM-5 Cluster	Item	λ	SE	N
Dutch	B	Unwanted memories of the stressful experience	0.862393	0.0186656	586
		Disturbing dreams of the stressful experience	0.876897	0.0222989
		Feeling or acting as if the stressful experience were actually happening again	0.8742	0.0206741
		Feeling very upset	0.949733	0.0126429
		Having strong physical reactions	0.887739	0.0212424
		M	0.890192	0.0191048
		SD	0.0344835	0.00384652
	C	Avoiding memories, thoughts, or feelings	0.886023	0.0214061
		Avoiding external reminders	0.883856	0.0219054
		M	0.88494	0.0216558				B	min	0.843014
		SD	0.00153224	0.000353032					max	0.909822
	D	Trouble remembering important parts	0.651082	0.0337255
		Having strong negative beliefs about yourself, other people, or the world	0.832728	0.0236614				C	min	0.88494
		Blaming yourself or someone else	0.707437	0.0355246					max	0.910684
		Having strong negative feelings	0.88622	0.0187247
		Loss of interest in activities	0.809122	0.0218192				D	min	0.754264
		Feeling distant or cut off	0.828634	0.0217506					max	0.812985
		Trouble experiencing positive feelings	0.852226	0.020242
		M	0.79535	0.025064				E	min	0.728079
		SD	0.0843887	0.00672505					max	0.787821
	E	Irritable behaviour, angry outbursts, or acting aggressively	0.759982	0.0272728
		Taking too many risks or doing things that could cause you harm	0.661528	0.0486238
		Being “super alert” or watchful or on guard	0.666995	0.0321879
		Feeling jumpy or easily startled	0.820167	0.0245737
		Having difficulty concentrating	0.770455	0.025884
		Trouble falling or staying asleep	0.689345	0.0299882
		M	0.728079	0.0314217
		SD	0.0647369	0.00886937
English	B	Unwanted memories of the stressful experience	0.849226	0.0293466	213
English		Disturbing dreams of the stressful experience	0.949257	0.0273434
English		Feeling or acting as if the stressful experience were actually happening again	0.92432	0.0254117
English		Feeling very upset	0.832236	0.0316669
English		Having strong physical reactions	0.93284	0.0224949
	M	M	0.897576	0.0272527
	SD	SD	0.0530019	0.00353213
English	C	Avoiding memories, thoughts, or feelings	0.914969	0.0280891
English		Avoiding external reminders	0.906399	0.0284997
	M	M	0.910684	0.0282944
	SD	SD	0.00606016	0.000290322
English	D	Trouble remembering important parts	0.492603	0.0635711
English		Having strong negative beliefs about yourself, other people, or the world	0.862153	0.0255702
English		Blaming yourself or someone else	0.743898	0.0454271
English		Having strong negative feelings	0.831679	0.034456
English		Loss of interest in activities	0.802028	0.0322568
English		Feeling distant or cut off	0.851245	0.0233426
English		Trouble experiencing positive feelings	0.85658	0.0282052
	M	M	0.777169	0.0361184
	SD	SD	0.132092	0.0141131
English	E	Irritable behaviour, angry outbursts, or acting aggressively	0.732125	0.0429144
English		Taking too many risks or doing things that could cause you harm	0.623004	0.0618639
English		Being “super alert” or watchful or on guard	0.784845	0.0392987
English		Feeling jumpy or easily startled	0.82982	0.0407094
English		Having difficulty concentrating	0.804809	0.0311714
English		Trouble falling or staying asleep	0.689636	0.0474021
	M	M	0.74404	0.0438933
	SD	SD	0.0780609	0.0102889
Italian	B	Unwanted memories of the stressful experience	0.894175	0.0182732	261
Italian		Disturbing dreams of the stressful experience	0.841554	0.0257353
Italian		Feeling or acting as if the stressful experience were actually happening again	0.832137	0.0289687
Italian		Feeling very upset	0.946309	0.0197817
Italian		Having strong physical reactions	0.853105	0.0285048
		M	0.873456	0.0242528
		SD	0.0471062	0.0049564
Italian	C	Avoiding memories, thoughts, or feelings	0.942903	0.0175059
Italian		Avoiding external reminders	0.949791	0.0132511
		M	0.946347	0.0153785
		SD	0.00487042	0.00300864
Italian	D	Trouble remembering important parts	0.588913	0.0491579
Italian		Having strong negative beliefs about yourself, other people, or the world	0.799037	0.033534
Italian		Blaming yourself or someone else	0.713304	0.0433041
Italian		Having strong negative feelings	0.894308	0.0229922
Italian		Loss of interest in activities	0.760242	0.0341688
Italian		Feeling distant or cut off	0.844789	0.0276076
Italian		Trouble experiencing positive feelings	0.811219	0.0329677
		M	0.773116	0.0348189
		SD	0.0996846	0.00889736
Italian	E	Irritable behaviour, angry outbursts, or acting aggressively	0.812984	0.0330767
Italian		Taking too many risks or doing things that could cause you harm	0.647698	0.0446414
Italian		Being “super alert” or watchful or on guard	0.741214	0.0342127
Italian		Feeling jumpy or easily startled	0.898885	0.0269837
Italian		Having difficulty concentrating	0.734229	0.0394602
Italian		Trouble falling or staying asleep	0.663338	0.0420324
		M	0.749725	0.0367345
		SD	0.0942711	0.0065243
Norwegian	B	Unwanted memories of the stressful experience	0.897371	0.0235923	263
Norwegian		Disturbing dreams of the stressful experience	0.919134	0.0332399
Norwegian		Feeling or acting as if the stressful experience were actually happening again	0.938796	0.0259702
Norwegian		Feeling very upset	0.895603	0.0243831
Norwegian		Having strong physical reactions	0.898209	0.0309368
		M	0.909822	0.0276245
		SD	0.01883	0.00424282
Norwegian	C	Avoiding memories, thoughts, or feelings	0.925827	0.0217157
Norwegian		Avoiding external reminders	0.869801	0.0333927
		M	0.897814	0.0275542
		SD	0.0396169	0.00825686
Norwegian	D	Trouble remembering important parts	0.376874	0.0664479
Norwegian		Having strong negative beliefs about yourself, other people, or the world	0.862783	0.0316862
Norwegian		Blaming yourself or someone else	0.612263	0.0553628
Norwegian		Having strong negative feelings	0.920011	0.0325331
Norwegian		Loss of interest in activities	0.806194	0.0383065
Norwegian		Feeling distant or cut off	0.910679	0.0238739
Norwegian		Trouble experiencing positive feelings	0.791045	0.0380312
		M	0.754264	0.0408917
		SD	0.195938	0.0148414
Norwegian	E	Irritable behaviour, angry outbursts, or acting aggressively	0.794571	0.0332647
Norwegian		Taking too many risks or doing things that could cause you harm	0.643277	0.0616108
Norwegian		Being “super alert” or watchful or on guard	0.740026	0.0459727
Norwegian		Feeling jumpy or easily startled	0.888916	0.0301485
Norwegian		Having difficulty concentrating	0.839918	0.0249427
Norwegian		Trouble falling or staying asleep	0.76409	0.0363648
		M	0.778466	0.0387174
		SD	0.0850827	0.0132301
Spanish	B	Unwanted memories of the stressful experience	0.843014	0.0246694	254
Spanish		Disturbing dreams of the stressful experience	0.852106	0.0335696
Spanish		Feeling or acting as if the stressful experience were actually happening again	0.843405	0.0284997
Spanish		Feeling very upset	0.850703	0.0271899
Spanish		Having strong physical reactions	0.933521	0.0196741
		M	0.86455	0.0267206
		SD	0.0387768	0.0051028
Spanish	C	Avoiding memories, thoughts, or feelings	0.894649	0.0257257
Spanish		Avoiding external reminders	0.902817	0.0246949
		M	0.898733	0.0252103
		SD	0.00577531	0.000728866
Spanish	D	Trouble remembering important parts	0.555728	0.0539486
Spanish		Having strong negative beliefs about yourself, other people, or the world	0.754777	0.0408128
Spanish		Blaming yourself or someone else	0.762967	0.037787
Spanish		Having strong negative feelings	0.938964	0.0220829
Spanish		Loss of interest in activities	0.844028	0.0268797
Spanish		Feeling distant or cut off	0.89654	0.0192796
Spanish		Trouble experiencing positive feelings	0.937894	0.0203265
		M	0.812985	0.0315882
		SD	0.136314	0.0130023
Spanish	E	Irritable behaviour, angry outbursts, or acting aggressively	0.793225	0.0361296
Spanish		Taking too many risks or doing things that could cause you harm	0.651949	0.0589002
Spanish		Being “super alert” or watchful or on guard	0.81075	0.0280006
Spanish		Feeling jumpy or easily startled	0.865071	0.025668
Spanish		Having difficulty concentrating	0.81384	0.0319663
Spanish		Trouble falling or staying asleep	0.792093	0.0331988
		M	0.787821	0.0356439
		SD	0.0716645	0.0119878
Note. DSM-5 cluster: B = Intrusion, C = Avoidance, D = Negative alterations in cognitions and mood, E = Arousal; M = mean, SD = standard deviation, λ = standardized item loading, SE = standard error, N = number of cases, model for the Finnish sample did not converge, values in bold respresent item loadings (λ) above .50.

## Sheet: Table 4. RPQ
Language	Item	λ	SE	N
Dutch	Headaches	0.649231	0.0276867	597
	Dizziness	0.654723	0.0284911		min	0.412677
	Nausea	0.643386	0.040802		max	0.919971
	Noise Sensitivity	0.738988	0.0228998
	Sleep Disturbance	0.664679	0.026106
	Fatigue	0.796256	0.017487
	Irritable	0.834616	0.015106
	Depressed	0.849577	0.0144892
	Frustrated	0.879467	0.0121699
	Forgetful	0.86047	0.011437
	Poor Concentration	0.917626	0.00795907
	Longer To Think	0.893532	0.00971237
	Blurred Vision	0.675831	0.0275442
	Light Sensitivity	0.732295	0.0264178
	Double Vision	0.6427	0.0377917
	Restless	0.861437	0.0141012
	M	0.768426	0.0212626
	SD	0.103019	0.00993187
English	Headaches	0.629012	0.0445188	223
English	Dizziness	0.672594	0.044675
English	Nausea	0.748743	0.0608516
English	Noise Sensitivity	0.728199	0.0382508
English	Sleep Disturbance	0.60117	0.0457769
English	Fatigue	0.720106	0.0374631
English	Irritable	0.835861	0.0239223
English	Depressed	0.770378	0.0299662
English	Frustrated	0.857029	0.0236498
English	Forgetful	0.870761	0.0187419
English	Poor Concentration	0.919971	0.0127078
English	Longer To Think	0.919165	0.0126545
English	Blurred Vision	0.684125	0.047618
English	Light Sensitivity	0.62427	0.0572357
English	Double Vision	0.556749	0.0517443
English	Restless	0.743276	0.0380481
	M	0.742588	0.0367391
	SD	0.113179	0.0150945
Finnish	Headaches	0.412677	0.0565733	213
Finish	Dizziness	0.694863	0.0401999
Finish	Nausea	0.636568	0.0583235
Finish	Noise Sensitivity	0.756311	0.0410149
Finish	Sleep Disturbance	0.607478	0.0478922
Finish	Fatigue	0.846498	0.023307
Finish	Irritable	0.810309	0.0306226
Finish	Depressed	0.760842	0.0371441
Finish	Frustrated	0.896168	0.0194312
Finish	Forgetful	0.743858	0.0355789
Finish	Poor Concentration	0.866434	0.022233
Finish	Longer To Think	0.860147	0.0248095
Finish	Blurred Vision	0.772499	0.0375754
Finish	Light Sensitivity	0.741832	0.0419805
Finish	Double Vision	0.701489	0.0610517
Finish	Restless	0.831435	0.03157
	M	0.746213	0.0380817
	SD	0.120977	0.012917
Italian	Headaches	0.553067	0.0459708	268
Italian	Dizziness	0.522863	0.0495787
Italian	Nausea	0.571867	0.0612468
Italian	Noise Sensitivity	0.74266	0.0341547
Italian	Sleep Disturbance	0.667859	0.0353034
Italian	Fatigue	0.686422	0.0332829
Italian	Irritable	0.795702	0.0248066
Italian	Depressed	0.808276	0.0251953
Italian	Frustrated	0.766994	0.0279089
Italian	Forgetful	0.796578	0.0227542
Italian	Poor Concentration	0.90841	0.0146558
Italian	Longer To Think	0.8458	0.0195853
Italian	Blurred Vision	0.681644	0.0394855
Italian	Light Sensitivity	0.73058	0.0352809
Italian	Double Vision	0.606994	0.0523556
Italian	Restless	0.710516	0.041698
	M	0.712265	0.035204
	SD	0.109374	0.0127618
Norwegian	Headaches	0.699461	0.0399551	263
Norwegian	Dizziness	0.681896	0.0432052
Norwegian	Nausea	0.679994	0.0645162
Norwegian	Noise Sensitivity	0.762722	0.0363232
Norwegian	Sleep Disturbance	0.637726	0.0432944
Norwegian	Fatigue	0.795299	0.0274881
Norwegian	Irritable	0.800114	0.0269888
Norwegian	Depressed	0.726172	0.0381656
Norwegian	Frustrated	0.853841	0.0213
Norwegian	Forgetful	0.846895	0.0223716
Norwegian	Poor Concentration	0.91154	0.015479
Norwegian	Longer To Think	0.87398	0.0216454
Norwegian	Blurred Vision	0.698144	0.0433768
Norwegian	Light Sensitivity	0.665977	0.0498932
Norwegian	Double Vision	0.493365	0.0766013
Norwegian	Restless	0.778363	0.033609
	M	0.744093	0.0377633
	SD	0.105668	0.0162752
Spanish	Headaches	0.59817	0.0435467	254
Spanish	Dizziness	0.585602	0.051454
Spanish	Nausea	0.670416	0.0737824
Spanish	Noise Sensitivity	0.746327	0.037843
Spanish	Sleep Disturbance	0.710506	0.0365132
Spanish	Fatigue	0.750563	0.033297
Spanish	Irritable	0.726747	0.0360499
Spanish	Depressed	0.776686	0.0296738
Spanish	Frustrated	0.79303	0.0306269
Spanish	Forgetful	0.790078	0.0245091
Spanish	Poor Concentration	0.904672	0.0189215
Spanish	Longer To Think	0.78932	0.0327914
Spanish	Blurred Vision	0.75685	0.0410487
Spanish	Light Sensitivity	0.767232	0.0381321
Spanish	Double Vision	0.683777	0.0601516
Spanish	Restless	0.794169	0.0371385
	M	0.740259	0.0390925
	SD	0.078879	0.0134134
Note. M = mean, SD = standard deviation, λ = standardized item loading, SE = standard error, N = number of cases, values in bold respresent standardized item loadings (λ) above .50.

## Sheet: Table 5a. QOLIBRI Cognition
Language	Scale	Item	λ	SE	N
Dutch	Cognition	Concentrate	0.832553	0.0172657	583
		Express yourself	0.810707	0.0206449
		Remember	0.834163	0.016073			min	0.738677
		Plan and problem solve	0.916749	0.0123165			max	0.921184
		Decisions	0.898767	0.0136543
		Find way	0.810833	0.0229228
		Speed of thinking	0.882898	0.0140636
		M	0.855238	0.02
		SD	0.0435068	0
Italian		Concentrate	0.875756	0.0207317	271
		Express yourself	0.826177	0.0242829
		Remember	0.776449	0.0281278
		Plan and problem solve	0.86215	0.0220244
		Decisions	0.915679	0.0164924
		Find way	0.829744	0.0255958
		Speed of thinking	0.921184	0.0143847
		M	0.858163	0.02
		SD	0.0518219	0
Norwegian		Concentrate	0.8419	0.0236047	247
		Express yourself	0.81242	0.0251698
		Remember	0.823442	0.0230752
		Plan and problem solve	0.907073	0.0168689
		Decisions	0.901951	0.0165886
		Find way	0.754238	0.0340788
		Speed of thinking	0.901075	0.02
		M	0.848871	0.02
		SD	0.0576042	0.01
Spanish		Concentrate	0.850705	0.0226838	255
		Express yourself	0.824182	0.0266149
		Remember	0.787622	0.0290607
		Plan and problem solve	0.844705	0.0241235
		Decisions	0.891733	0.0202518
		Find way	0.738677	0.0353294
		Speed of thinking	0.855925	0.0209395
		M	0.82765	0.03
		SD	0.0504298	0.01
Note. M = mean, SD = standard deviation, λ = standardized item loading, SE = standard error, N = number of cases, models for the English and Finnish samples did not converge, values in bold respresent standardized item loadings (λ) above .50.

## Sheet: Table 5b. QOLIBRI Self
Language	Scale	Item	λ	SE	N
Dutch	Self	Energy	0.852345	0.0157944	583
		Motivation	0.847521	0.0160151
		Self-esteem	0.922256	0.0112354			min	0.74925
		Way you look	0.750821	0.0225512			max	0.930605
		Achievements	0.843396	0.016348
		Self-perception	0.890705	0.0131938
		Own future	0.889787	0.014708
		M	0.85669	0.0156923
		SD	0.054832	0.0035276
Italian		Energy	0.88358	0.0171785	271
		Motivation	0.900357	0.0160875
		Self-esteem	0.908339	0.0129365
		Way you look	0.844722	0.0185168
		Achievements	0.789581	0.0316731
		Self-perception	0.889609	0.0184788
		Own future	0.856549	0.0211425
		M	0.867534	0.0194305
		SD	0.041241	0.00595782
Norwegian		Energy	0.872077	0.0200889	247
		Motivation	0.835247	0.0252676
		Self-esteem	0.900921	0.0157588
		Way you look	0.74925	0.0303622
		Achievements	0.848769	0.0224512
		Self-perception	0.926637	0.0145907
		Own future	0.886788	0.018129
		M	0.859955	0.0209498
		SD	0.0577104	0.00556138
Spanish		Energy	0.850877	0.0212599	255
		Motivation	0.879079	0.0182134
		Self-esteem	0.873293	0.0176754
		Way you look	0.838192	0.0202822
		Achievements	0.798721	0.0249262
		Self-perception	0.930605	0.0128378
		Own future	0.828518	0.0229781
		M	0.857041	0.019739
		SD	0.0423667	0.00396273
Note. M = mean, SD = standard deviation, λ = standardized item loading, SE = standard error, N = number of cases, models for the English and Finnish samples did not converge, values in bold respresent standardized item loadings (λ) above .50.

## Sheet: Table 5c. QOLIBRI Daily Life
Language	Scale	Item	λ	SE	N
Dutch	Daily Life and Autonomy	Independence	0.891347	0.013929	583
		Get out and about	0.875726	0.0163359
		Domestic activities	0.860584	0.017139			min	0.761219
		Run personal ﬁnances	0.83991	0.0193352			max	0.958941
		Participation in work	0.877808	0.015113
		Social-leisure activities	0.900229	0.0143592
		In charge of life	0.958941	0.00963124
		M	0.886364	0.0151204
		SD	0.0376241	0.00303992
Italian		Independence	0.901006	0.0141166	271
		Get out and about	0.875166	0.0188319
		Domestic activities	0.822034	0.0241413
		Run personal ﬁnances	0.807609	0.0276822
		Participation in work	0.894541	0.0175858
		Social-leisure activities	0.901389	0.0161245
		In charge of life	0.934198	0.0159884
		M	0.876563	0.0192101
		SD	0.0458054	0.00491118
Norwegian		Independence	0.761219	0.0332267	247
		Get out and about	0.80152	0.030689
		Domestic activities	0.840807	0.0268656
		Run personal ﬁnances	0.765033	0.0345867
		Participation in work	0.787868	0.0310236
		Social-leisure activities	0.800645	0.0281702
		In charge of life	0.890182	0.0260225
		M	0.806753	0.0300835
		SD	0.0453787	0.00321239
Spanish		Independence	0.859677	0.0195769	255
		Get out and about	0.897839	0.0180784
		Domestic activities	0.835854	0.0239898
		Run personal ﬁnances	0.774046	0.0288108
		Participation in work	0.872967	0.0210897
		Social-leisure activities	0.880308	0.0185463
		In charge of life	0.954175	0.0122441
		M	0.867838	0.0203337
		SD	0.0554114	0.00516552
Note. M = mean, SD = standard deviation, λ = standardized item loading, SE = standard error, N = number of cases, models for the English and Finnish samples did not converge, values in bold respresent standardized item loadings (λ) above .50.

## Sheet: Table 5d. QOLIBRI Social
Language	Scale	Item	λ	SE	N
Dutch	Social	Affection towards others	0.902837	0.017801	583
		Family members	0.789873	0.0243721			min	0.646916
		Friends	0.873617	0.0197943			max	0.921762
		Partner	0.767154	0.0270271
		Sex life	0.730843	0.0296631
		Attitudes of others	0.873969	0.0186718
		M	0.823049	0.0228882
		SD	0.0696319	0.00486749
Italian		Affection towards others	0.87168	0.0288964	271
		Family members	0.787901	0.033205
		Friends	0.903762	0.0211923
		Partner	0.737282	0.0352326
		Sex life	0.820264	0.0294617
		Attitudes of others	0.830618	0.0286791
		M	0.825251	0.0294445
		SD	0.0591724	0.00482968
Norwegian		Affection towards others	0.850287	0.032117	247
		Family members	0.797253	0.0339601
		Friends	0.742472	0.0391228
		Partner	0.67414	0.0411374
		Sex life	0.646916	0.0463631
		Attitudes of others	0.921762	0.0260464
		M	0.772138	0.0364578
		SD	0.105157	0.00721932
Spanish		Affection towards others	0.824251	0.032484	255
		Family members	0.726675	0.0401278
		Friends	0.775605	0.0352918
		Partner	0.757238	0.0424835
		Sex life	0.796646	0.0406742
		Attitudes of others	0.784198	0.0334357
		M	0.777435	0.0374162
		SD	0.0334496	0.0042031
Note. M = mean, SD = standard deviation, λ = standardized item loading, SE = standard error, N = number of cases, models for the English and Finnish samples did not converge, values in bold respresent standardized item loadings (λ) above .50.

## Sheet: Table 5e. QOLIBRI Emotions
Language	Scale	Item	λ	SE	N
Dutch	Emotions	Loneliness	0.8357	0.020665	583
		Boredom	0.776086	0.0284977			min	0.625915
		Anxiety	0.837667	0.0204463			max	0.972597
		Depression	0.910955	0.0143992
		Anger/aggression	0.746662	0.0286617
		M	0.821414	0.022534
		SD	0.0634985	0.00606505
Italian		Loneliness	0.834043	0.0379218	271
		Boredom	0.7623	0.0411821
		Anxiety	0.819143	0.031095
		Depression	0.972597	0.0248237
		Anger/aggression	0.625915	0.0532587
		M	0.8028	0.0376563
		SD	0.125502	0.0107664
Norwegian		Loneliness	0.803686	0.0424159	247
		Boredom	0.697764	0.0457927
		Anxiety	0.825689	0.0416772
		Depression	0.889607	0.0341948
		Anger/aggression	0.772688	0.0490333
		M	0.797887	0.0426228
		SD	0.0704962	0.00554775
Spanish		Loneliness	0.798687	0.0453084	255
		Boredom	0.741749	0.0430672
		Anxiety	0.821949	0.0336145
		Depression	0.904771	0.0321428
		Anger/aggression	0.649671	0.0465744
		M	0.783365	0.0401414
		SD	0.094959	0.00676794
Note. M = mean, SD = standard deviation, λ = standardized item loading, SE = standard error, N = number of cases, models for the English and Finnish samples did not converge, values in bold respresent standardized item loadings (λ) above .50.

## Sheet: Table 5f. QOLIBRI Physical
Language	Scale	Item	λ	SE	N
Dutch	Physical	Slowness/clumsy	0.861275	0.024882	583
		Other injuries	0.594533	0.0359124			min	0.594533
		Pain	0.717651	0.0297232			max	0.91692
		See/hear	0.619417	0.0387244
		TBI effects	0.829235	0.0255271
		M	0.724422	0.0309538
		SD	0.12006	0.00618061
Italian		Slowness/clumsy	0.881036	0.0339333	271
		Other injuries	0.751198	0.0346842
		Pain	0.755397	0.0379279
		See/hear	0.695065	0.0457814
		TBI effects	0.870288	0.0301292
		M	0.790597	0.0364912
		SD	0.0813135	0.00588763
Norwegian		Slowness/clumsy	0.799011	0.0517979	247
		Other injuries	0.636401	0.0539655
		Pain	0.79071	0.0419765
		See/hear	0.626448	0.0580929
		TBI effects	0.89241	0.0314759
		M	0.748996	0.0474617
		SD	0.11457	0.010721
Spanish		Slowness/clumsy	0.91692	0.0332555	255
		Other injuries	0.62942	0.0502176
		Pain	0.734325	0.0427922
		See/hear	0.729402	0.0417061
		TBI effects	0.79171	0.0366747
		M	0.760355	0.0409292
		SD	0.105208	0.00646789
Note. M = mean, SD = standard deviation, λ = standardized item loading, SE = standard error, N = number of cases, models for the English and Finnish samples did not converge, values in bold respresent standardized item loadings (λ) above .50.

[truncated: 12 more sheets: Table 6. QOLIBRI-OS, Table 7a. SF-36v2 PF, Table 7b. SF-36v2 RP, Table 7c. SF-36v2 BP, Table 7d. SF-36v2 GH, Table 7e. SF-36v2 VT, Table 7f. SF-36v2 SF, Table 7g. SF-36v2 RE, Table 7h. SF-36v2 MH, Table 7i. SF-36v2 PCS, Table 7j. SF-36v2 MCS, Table 8. SF-12v2]
